# Supplementary material for: Asymmetric Mannich reaction: highly enantioselective synthesis of 3-amino-oxindoles via chiral squaramide based H-bond donor catalysis
Source: Royal Society of Chemistry journal article supplement (doi:10.1039/c6ra16877a), 2016-01-01
Supplement: c6ra16877a1.pdf [file c6ra16877a1.pdf]

## Asymmetric Mannich Reaction: Highly Enantioselective Synthesis of 3-Amino-oxindoles via Chiral Squaramide Based *H*-bond Donor Catalysis

Kadiyala Srinivasa Rao,<sup>a</sup> Pambala Ramesh,<sup>a</sup> L. Raju Chowhan<sup>b</sup> and Rajiv Trivedi\*<sup>a</sup>

<sup>a</sup> *Inorganic and Physical Chemistry Division, CSIR-Indian Institute of Chemical Technology, Uppal Road, Tarnaka, Hyderabad - 500007, India.*

E-mail: [trivedi@iict.res.in](mailto:trivedi@iict.res.in), [rtrajiv401@gmail.com](mailto:rtrajiv401@gmail.com); Phone: +91 40 27191667; Fax: +91 40 27160921.

<sup>b</sup> *School of Chemical Sciences, Central University of Gujarat, Gandhinagar-382030, India.*

### List of Contents

1. General method
2. General procedure for the enantioselective Mannich Reactions
3. <sup>1</sup>H NMR, <sup>13</sup>C NMR spectra of products **4a-g** and **5a-p**
4. HPLC chromatogram of product **4** and **5**
5. X-ray structure report for product **5g**

## 1) General method

All reactions were carried out in an inert atmosphere unless otherwise indicated, following standard syringe septa techniques. Chemicals were purchased from Aldrich and used as received. Solvents used for reactions were dried before use according to standard procedures where needed. Product purification by Flash chromatography was carried out with silica gel (60-120 mesh). Technical grade solvents were used for chromatography and distilled prior to use. NMR spectra were recorded in Fourier transform mode.  $^1\text{H}$  and  $^{13}\text{C}$  NMR spectra were recorded with Bruker-Avance 300 MHz, Varian Inova 400 MHz, Varian Inova 400 MHz spectrometers using trimethylsilane as an internal standard in  $\text{CDCl}_3$ ,  $\text{CD}_3\text{OD}$  and  $\text{DMSO-d}_6$  solvents. Multiplicities in the  $^1\text{H}$  NMR spectra are described as: s = singlet, d = doublet, t = triplet, q = quartet, qt = quintet, m = multiplet, br = broad; coupling constants are reported in Hz. IR spectra were recorded on a Thermo Nicolet Nexus 670 spectrometer and reported in  $\text{cm}^{-1}$ . Mass spectra were recorded with a Waters 2695 for low (MS) and Thermo Scientific Exactive spectrometer for HRMS. Melting points were recorded on a Toshniwal melting point apparatus. Enantiomeric excesses were determined by using HPLC analysis with Daicel Chiralpak AD-H or IC columns, as indicated. The squaramide organocatalysts **1a-c**<sup>la,b</sup>, **1d-e**<sup>lc</sup> and **1f-i**<sup>ld</sup> were prepared following the literature procedures.

## 2) General Procedure for the Enantioselective Mannich Reactions

To a solution of ketimine **2** (0.25 mmol) in  $\text{CH}_2\text{Cl}_2$  (1.5 ml) was added squaramide bifunctional catalyst **1g** (5 mg, 0.0075 mmol, 3 mol %) and the mixture was stirred for 5 min under  $\text{N}_2$  atmosphere. Then 1,3-dicarbonyl compound **3** (0.3 mmol) was added to the mixture. Upon consumption of ketimine substrate (monitored by TLC), the reaction mixture was concentrated and purified by silica gel column chromatography to afford the conjugate addition products **4** (or) **5**.

**Compound 4a:** White solid; Yield 99%;  $[\alpha]_D^{30} = -11.6$  ( $c = 0.5$  in  $\text{CHCl}_3$ ); IR (KBr)  $\nu_{\text{max}}$  ( $\text{cm}^{-1}$ ) 3427, 2924, 1732, 1711, 1614, 1493, 1367, 1258, 1160, 1088, 1023, 752;  $^1\text{H-NMR}$  (300 MHz,  $\text{CDCl}_3$ ),  $\delta$  (ppm) 7.34-7.25 (m, 2H), 7.02 (t,  $J = 7.5$  Hz, 1H), 6.83 (d,  $J = 7.8$  Hz, 1H), 6.49 (s, 1H), 4.09 (s, 1H), 3.24 (s, 3H), 2.29 (s, 3H), 2.17 (s, 3H), 1.26 (s, 9H);  $^{13}\text{C}$  NMR (75 MHz,  $\text{CDCl}_3$ ),  $\delta$  (ppm) 201.7, 201.3, 174.0, 153.7, 143.3, 129.6, 128.1, 123.5, 122.8, 108.4, 80.3, 68.4, 62.6, 32.2, 32.1, 28.0, 26.5; ESI-MS:  $m/z$ : 383 ( $\text{M}+\text{Na}$ )<sup>+</sup>, HR-MS calcd for  $\text{C}_{19}\text{H}_{24}\text{N}_2\text{O}_5\text{Na}$ : 383.1577 [ $\text{M}+\text{Na}$ ]<sup>+</sup>, found: 383.1571; HPLC (IC, 20% iPrOH in Hexanes, 1 mL/min, 254 nm):  $t_{\text{major}} = 24.1$  min,  $t_{\text{minor}} = 19.7$  min, >99% ee.

**Compound 4b:** White solid; Yield 90%;  $[\alpha]_D^{30} = +6.5$  ( $c = 0.5$  in  $\text{CHCl}_3$ ); IR (KBr)  $\nu_{\text{max}}$  ( $\text{cm}^{-1}$ ) 3363, 2975, 1725, 1669, 1620, 1472, 1398, 1363, 1165, 1060, 757;  $^1\text{H-NMR}$  (300 MHz,  $\text{CDCl}_3$ ),  $\delta$  (ppm) 8.50 (s, 1H), 7.29-7.16 (m, 2H), 6.98 (t,  $J = 7.5$  Hz, 1H), 6.79 (d,  $J = 7.5$  Hz, 1H), 6.73 (s, 1H), 4.12 (s, 1H), 2.34 (s, 3H), 2.16 (s, 3H), 1.32 (s, 9H);  $^{13}\text{C}$  NMR (75 MHz,  $\text{CDCl}_3$ ),  $\delta$  (ppm) 201.3, 201.0, 175.8, 154.0, 140.6, 129.5, 123.8, 122.8, 110.6, 80.7, 67.8, 63.1, 32.5, 32.4,

28.1; ESI-MS:  $m/z$ : 369 ( $M+Na$ )<sup>+</sup>, HR-MS calcd for  $C_{18}H_{22}N_2O_5Na$ : 369.1421 [ $M+Na$ ]<sup>+</sup>, found: 369.1410; HPLC (IC, 20% iPrOH in Hexanes, 1 mL/min, 254 nm):  $t_{major}$  = 11.3 min,  $t_{minor}$  = 14.1 min, 86% ee.

**Compound 4c:** White solid; Yield 92%;  $[\alpha]^{30}_D$  = -29.7 ( $c$  = 0.5 in  $CHCl_3$ ); IR (KBr)  $\nu_{max}$  ( $cm^{-1}$ ) 3411, 2978, 1716, 1611, 1488, 1467, 1363, 1279, 1248, 1164, 755;  $^1H$ -NMR (300 MHz,  $CDCl_3$ ),  $\delta$  (ppm) 7.33-7.27 (m, 2H), 7.01 (t,  $J$  = 7.6 Hz, 1H), 6.84 (d,  $J$  = 7.7 Hz, 1H), 6.39 (s, 1H), 4.13 (s, 1H), 3.96-3.84 (m, 1H), 3.72-3.60 (m, 1H), 2.26 (s, 3H), 2.19 (s, 3H), 1.33-1.24 (m, 12H);  $^{13}C$  NMR (75 MHz,  $CDCl_3$ ),  $\delta$  (ppm) 201.6, 201.5, 173.6, 153.8, 142.5, 129.5, 128.4, 123.9, 122.6, 108.5, 80.4, 68.5, 62.5, 35.1, 32.2, 32.1, 29.6, 28.1, 12.3; ESI-MS:  $m/z$ : 397 ( $M+Na$ )<sup>+</sup>, HR-MS calcd for  $C_{20}H_{26}N_2O_5Na$ : 397.1734 [ $M+Na$ ]<sup>+</sup>, found: 397.1721; HPLC (IC, 30% iPrOH in Hexanes, 1 mL/min, 254 nm):  $t_{major}$  = 14.1 min,  $t_{minor}$  = 9.2 min, 92% ee.

**Compound 4d:** White solid; Yield 96%;  $[\alpha]^{30}_D$  = -9.3 ( $c$  = 0.5 in  $CHCl_3$ ); IR (KBr)  $\nu_{max}$  ( $cm^{-1}$ ) 3383, 2974, 1730, 1708, 1613, 1496, 1362, 1278, 1249, 1165, 748;  $^1H$ -NMR (300 MHz,  $CDCl_3$ ),  $\delta$  (ppm) 7.41 (d,  $J$  = 7.6 Hz, 2H), 7.35 (t,  $J$  = 7.6 Hz, 2H), 7.28 (t,  $J$  = 7.6 Hz, 2H), 7.18 (t,  $J$  = 7.7 Hz, 1H), 6.98 (t,  $J$  = 7.6 Hz, 1H), 6.72 (d,  $J$  = 7.7 Hz, 1H), 6.58 (s, 1H), 5.05 (d,  $J$  = 15.1 Hz, 1H), 4.83 (s, 1H), 4.07 (s, 1H), 2.31 (s, 3H), 2.16 (s, 3H), 1.31 (s, 9H);  $^{13}C$  NMR (75 MHz,  $CDCl_3$ ),  $\delta$  (ppm) 201.6, 201.3, 174.2, 153.8, 142.5, 135.5, 129.4, 128.7, 127.6, 127.5, 123.6, 122.9, 109.5, 80.4, 68.5, 62.7, 44.3, 32.3, 32.2, 28.1; ESI-MS:  $m/z$ : 459 ( $M+Na$ )<sup>+</sup>, HR-MS calcd for  $C_{25}H_{28}N_2O_5Na$ : 459.1890 [ $M+Na$ ]<sup>+</sup>, found: 459.1875; HPLC (IC, 5% iPrOH in Hexanes, 0.5 mL/min, 210 nm):  $t_{major}$  = 105.6 min,  $t_{minor}$  = 98.3 min, 99% ee.

**Compound 4e:** White solid; Yield 85%;  $[\alpha]^{30}_D$  = -6.6 ( $c$  = 0.1 in  $CHCl_3$ ); IR (KBr)  $\nu_{max}$  ( $cm^{-1}$ ) 3404, 2979, 1766, 1708, 1471, 1368, 1337, 1273, 1168, 759;  $^1H$ -NMR (300 MHz,  $CDCl_3$ ),  $\delta$  (ppm) 8.24 (d,  $J$  = 8.2 Hz, 1H), 7.36 (t,  $J$  = 7.4, 8.2 Hz, 1H), 7.26 (d,  $J$  = 7.4 Hz, 1H), 7.18 (t,  $J$  = 7.4, 7.6 Hz, 1H), 6.64 (s, 1H), 4.05 (s, 1H), 2.70 (s, 3H), 2.24 (s, 3H), 2.18 (s, 3H), 1.26 (s, 9H);  $^{13}C$  NMR (75 MHz,  $CDCl_3$ ),  $\delta$  (ppm) 201.8, 200.7, 175.0, 170.6, 153.6, 140.0, 130.0, 127.5, 125.4, 122.5, 116.8, 81.2, 69.5, 63.0, 32.1, 32.0, 27.9, 26.6; ESI-MS:  $m/z$ : 411 ( $M+Na$ )<sup>+</sup>, HR-MS calcd for  $C_{20}H_{24}N_2O_6Na$ : 411.1532 [ $M+Na$ ]<sup>+</sup>, found: 411.1518; HPLC (IC, 20% iPrOH in Hexanes, 1 mL/min, 225 nm):  $t_{major}$  = 6.8 min,  $t_{minor}$  = 10.3 min, 33% ee.

**Compound 4f:** White solid; Yield 91%;  $[\alpha]^{30}_D$  = -36.8 ( $c$  = 0.5 in  $CHCl_3$ ); IR (KBr)  $\nu_{max}$  ( $cm^{-1}$ ) 3448, 2986, 1729, 1710, 1611, 1490, 1363, 1276, 1168, 756;  $^1H$ -NMR (300 MHz,  $CDCl_3$ ),  $\delta$  (ppm) 7.33-7.22 (m, 2H), 7.01 (t,  $J$  = 7.3, 7.5 Hz, 1H), 6.83 (d,  $J$  = 7.7 Hz, 1H), 6.47 (s, 1H), 5.98-5.81 (m, 1H), 5.38 (d,  $J$  = 16.4 Hz, 1H), 5.26 (d,  $J$  = 10.3 Hz, 1H), 4.50 (d,  $J$  = 15.3 Hz, 1H), 4.23 (d,  $J$  = 14.7 Hz, 1H), 4.12 (s, 1H), 2.27 (s, 3H), 2.19 (s, 3H), 1.29 (s, 9H);  $^{13}C$  NMR (75 MHz,  $CDCl_3$ ),  $\delta$  (ppm) 201.6, 201.4, 173.8, 153.8, 142.5, 131.2, 129.4, 128.1, 123.7, 122.8, 117.8, 109.3, 80.4, 68.4, 62.6, 42.7, 32.3, 32.1, 28.1; ESI-MS:  $m/z$ : 409 ( $M+Na$ )<sup>+</sup>, HR-MS calcd for  $C_{21}H_{26}N_2O_5Na$ : 409.0716 [ $M+Na$ ]<sup>+</sup>, found: 409.0678; HPLC (IC, 15% iPrOH in Hexanes, 1 mL/min, 254 nm):  $t_{major}$  = 23.2 min,  $t_{minor}$  = 18.9 min, 96% ee.

**Compound 4g:** White solid; Yield 93%;  $[\alpha]^{30}_{\text{D}} = -43.6$  ( $c = 0.5$  in  $\text{CHCl}_3$ ); IR (KBr)  $\nu_{\text{max}}$  ( $\text{cm}^{-1}$ ) 3440, 3266, 2978, 1730, 1710, 1612, 1489, 1363, 1278, 1259, 1168, 764, 707;  $^1\text{H-NMR}$  (300 MHz,  $\text{CDCl}_3$ ),  $\delta$  (ppm) 7.36-7.29 (m, 2H), 7.09-7.04 (m, 2H), 6.50 (s, 1H), 4.81 (dd,  $J = 2.4, 17.7$  Hz, 1H), 4.27 (dd,  $J = 2.4, 17.7$  Hz, 1H), 4.13 (s, 1H), 2.30 (t,  $J = 2.4$  Hz, 1H), 2.29 (s, 3H), 2.18 (s, 3H), 1.28 (s, 9H);  $^{13}\text{C NMR}$  (75 MHz,  $\text{CDCl}_3$ ),  $\delta$  (ppm) 201.1, 173.1, 153.8, 141.4, 129.6, 128.0, 124.0, 123.3, 109.4, 80.5, 76.6, 72.6, 68.1, 62.5, 32.3, 32.1, 29.7, 28.0; ESI-MS:  $m/z$ : 407 ( $\text{M}+\text{Na}$ ) $^+$ , HR-MS calcd for  $\text{C}_{21}\text{H}_{24}\text{N}_2\text{O}_5\text{Na}$ : 407.1577 [ $\text{M}+\text{Na}$ ] $^+$ , found: 407.1560; HPLC (IC, 20% *i*PrOH in Hexanes, 1 mL/min, 254 nm):  $t_{\text{major}} = 17.1$  min,  $t_{\text{minor}} = 15.5$  min, 98% ee.

**Compound 5a:** White solid; Yield 94%;  $[\alpha]^{30}_{\text{D}} = -13.8$  ( $c = 0.5$  in  $\text{CHCl}_3$ ); IR (KBr)  $\nu_{\text{max}}$  ( $\text{cm}^{-1}$ ) 3408, 2925, 1718, 1614, 1498, 1361, 1255, 1164, 1098, 1059, 812, 756;  $^1\text{H-NMR}$  (300 MHz,  $\text{CDCl}_3$ ),  $\delta$  (ppm) 7.13-7.06 (m, 2H), 6.72 (d,  $J = 7.9$  Hz, 1H), 6.51 (s, 1H), 4.07 (s, 1H), 3.22 (s, 3H), 2.30 (s, 6H), 2.17 (s, 3H), 1.27 (s, 9H);  $^{13}\text{C NMR}$  (75 MHz,  $\text{CDCl}_3$ ),  $\delta$  (ppm) 201.8, 201.4, 174.0, 153.8, 141.0, 132.5, 129.8, 128.2, 124.3, 108.2, 80.3, 68.6, 62.7, 32.2, 32.1, 29.6, 28.0, 26.6, 21.1; ESI-MS:  $m/z$ : 397 ( $\text{M}+\text{Na}$ ) $^+$ ; HPLC (IC, 30% *i*PrOH in Hexanes, 1 mL/min, 254 nm):  $t_{\text{major}} = 22.0$  min,  $t_{\text{minor}} = 15.0$  min, 96% ee.

**Compound 5b:** White solid; Yield 97%;  $[\alpha]^{30}_{\text{D}} = -23.2$  ( $c = 0.5$  in  $\text{CHCl}_3$ ); IR (KBr)  $\nu_{\text{max}}$  ( $\text{cm}^{-1}$ ) 3421, 2925, 1727, 1604, 1497, 1463, 1362, 1286, 1164, 1123, 1033, 809;  $^1\text{H-NMR}$  (300 MHz,  $\text{CDCl}_3$ ),  $\delta$  (ppm) 6.95-6.78 (m, 2H), 6.73 (d,  $J = 8.5$  Hz, 1H), 6.50 (s, 1H), 4.09 (s, 1H), 3.76 (s, 3H), 3.22 (s, 3H), 2.30 (s, 3H), 2.18 (s, 3H), 1.28 (s, 9H);  $^{13}\text{C NMR}$  (75 MHz,  $\text{CDCl}_3$ ),  $\delta$  (ppm) 201.5, 201.2, 173.7, 156.1, 153.7, 136.7, 129.4, 113.8, 111.1, 108.8, 80.3, 68.4, 63.0, 55.8, 32.2, 32.0, 29.6, 28.0, 26.6; ESI-MS:  $m/z$ : 413 ( $\text{M}+\text{Na}$ ) $^+$ ; HPLC (IC, 30% *i*PrOH in Hexanes, 1 mL/min, 254 nm):  $t_{\text{major}} = 33.2$  min,  $t_{\text{minor}} = 16.2$  min, 96% ee.

**Compound 5c:** White solid; Yield 92%;  $[\alpha]^{30}_{\text{D}} = -16.5$  ( $c = 0.5$  in  $\text{CHCl}_3$ ); IR (KBr)  $\nu_{\text{max}}$  ( $\text{cm}^{-1}$ ) 3431, 2981, 1735, 1707, 1622, 1495, 1361, 1275, 1164, 1123, 1059, 1022, 865, 814;  $^1\text{H-NMR}$  (300 MHz,  $\text{CDCl}_3$ ),  $\delta$  (ppm) 7.10 (dd,  $J = 2.6, 7.9$  Hz, 1H), 7.04-6.98 (m, 1H), 6.76 (dd,  $J = 4.1, 8.5$  Hz, 1H), 6.43 (s, 1H), 4.12 (s, 1H), 3.24 (s, 3H), 2.30 (s, 3H), 2.19 (s, 3H), 1.30 (s, 9H);  $^{13}\text{C NMR}$  (75 MHz,  $\text{CDCl}_3$ ),  $\delta$  (ppm) 201.2, 201.1, 173.8, 160.1, 158.2, 153.7, 139.4, 115.9, 115.7, 112.3, 112.1, 109.0, 80.6, 68.2, 62.7, 32.3, 31.9, 28.0, 26.7; ESI-MS:  $m/z$ : 401 ( $\text{M}+\text{Na}$ ) $^+$ ; HPLC (IC, 30% *i*PrOH in Hexanes, 1 mL/min, 254 nm):  $t_{\text{major}} = 12.3$  min,  $t_{\text{minor}} = 9.0$  min, 95% ee.

**Compound 5d:** White solid; Yield 95%;  $[\alpha]^{30}_{\text{D}} = -36.6$  ( $c = 0.5$  in  $\text{CHCl}_3$ ); IR (KBr)  $\nu_{\text{max}}$  ( $\text{cm}^{-1}$ ) 3407, 2924, 1737, 1703, 1610, 1487, 1423, 1359, 1267, 1168, 1055, 1022, 819;  $^1\text{H-NMR}$  (300 MHz,  $\text{CDCl}_3$ ),  $\delta$  (ppm) 7.33-7.25 (m, 2H), 6.77 (d,  $J = 9.1$  Hz, 1H), 6.46 (s, 1H), 4.10 (s, 1H), 3.23 (s, 3H), 2.30 (s, 3H), 2.19 (s, 3H), 1.30 (s, 9H);  $^{13}\text{C NMR}$  (75 MHz,  $\text{CDCl}_3$ ),  $\delta$  (ppm) 201.1, 173.6, 153.6, 142.0, 129.7, 129.5, 128.2, 124.3, 109.4, 80.6, 68.2, 62.4, 32.2, 32.0, 28.0, 26.6; ESI-MS:  $m/z$ : 417 ( $\text{M}+\text{Na}$ ) $^+$ ; HPLC (IC, 30% *i*PrOH in Hexanes, 1 mL/min, 230 nm):  $t_{\text{major}} = 12.1$  min,  $t_{\text{minor}} = 8.5$  min, 95% ee.

**Compound 5e:** White solid; Yield 91%;  $[\alpha]^{30}_D = -36.4$  ( $c = 0.5$  in  $\text{CHCl}_3$ ); IR (KBr)  $\nu_{\text{max}}$  ( $\text{cm}^{-1}$ ) 3403, 2980, 1736, 1694, 1607, 1487, 1423, 1357, 1266, 1167, 1055, 1022, 818;  $^1\text{H-NMR}$  (300 MHz,  $\text{CDCl}_3$ ),  $\delta$  (ppm) 7.46-7.40 (m, 2H), 6.72 (d,  $J = 8.7$  Hz, 1H), 6.45 (s, 1H), 4.09 (s, 1H), 3.23 (s, 3H), 2.30 (s, 3H), 2.19 (s, 3H), 1.30 (s, 9H);  $^{13}\text{C NMR}$  (75 MHz,  $\text{CDCl}_3$ ),  $\delta$  (ppm) 201.2, 201.1, 173.5, 153.7, 142.5, 132.4, 130.1, 127.0, 115.5, 110.0, 80.7, 68.3, 62.4, 32.3, 32.0, 28.0, 26.7; ESI-MS:  $m/z$ : 463 ( $\text{M}+\text{Na}$ ) $^+$ ; HPLC (IC, 30%  $i\text{PrOH}$  in Hexanes, 1 mL/min, 230 nm):  $t_{\text{major}} = 12.6$  min,  $t_{\text{minor}} = 8.7$  min, 95% ee.

**Compound 5f:** White solid; Yield 93%;  $[\alpha]^{30}_D = -39.7$  ( $c = 0.5$  in  $\text{CHCl}_3$ ); IR (KBr)  $\nu_{\text{max}}$  ( $\text{cm}^{-1}$ ) 3389, 2977, 1738, 1689, 1603, 1483, 1421, 1357, 1262, 1168, 1055, 1022, 816;  $^1\text{H-NMR}$  (300 MHz,  $\text{CDCl}_3$ ),  $\delta$  (ppm) 7.63 (dd,  $J = 1.6, 8.1$  Hz, 1H), 7.57 (d,  $J = 1.6$  Hz, 1H), 6.62 (d,  $J = 8.2$  Hz, 1H), 6.45 (s, 1H), 4.06 (s, 1H), 3.22 (s, 3H), 2.29 (s, 3H), 2.19 (s, 3H), 1.30 (s, 9H);  $^{13}\text{C NMR}$  (75 MHz,  $\text{CDCl}_3$ ),  $\delta$  (ppm) 201.2, 201.1, 173.3, 153.6, 143.2, 138.4, 132.3, 130.3, 110.5, 85.2, 80.7, 68.2, 62.2, 32.3, 32.0, 29.6, 28.0, 26.6; ESI-MS:  $m/z$ : 509 ( $\text{M}+\text{Na}$ ) $^+$ ; HPLC (IC, 20%  $i\text{PrOH}$  in Hexanes, 1 mL/min, 254 nm):  $t_{\text{major}} = 21.4$  min,  $t_{\text{minor}} = 15.3$  min, 95% ee.

**Compound 5g:** White solid; Yield 99%;  $[\alpha]^{30}_D = +22.7$  ( $c = 0.5$  in  $\text{CHCl}_3$ ); IR (KBr)  $\nu_{\text{max}}$  ( $\text{cm}^{-1}$ ) 3413, 2924, 1738, 1706, 1604, 1459, 1361, 1252, 1167, 1107, 1055, 1024, 775;  $^1\text{H-NMR}$  (300 MHz,  $\text{CDCl}_3$ ),  $\delta$  (ppm) 7.41 (d,  $J = 8.2$  Hz, 1H), 7.19 (d,  $J = 7.4$  Hz, 1H), 6.86 (t,  $J = 7.3, 8.2$  Hz, 1H), 6.57 (s, 1H), 4.02 (s, 1H), 3.62 (s, 3H), 2.29 (s, 3H), 2.16 (s, 3H), 1.29 (s, 9H);  $^{13}\text{C NMR}$  (75 MHz,  $\text{CDCl}_3$ ),  $\delta$  (ppm) 201.4, 200.8, 174.6, 153.6, 140.6, 135.2, 131.4, 124.0, 122.4, 102.8, 80.7, 68.2, 62.2, 32.5, 31.8, 30.2, 29.6, 29.3, 28.0; ESI-MS:  $m/z$ : 463 ( $\text{M}+\text{Na}$ ) $^+$ ; HPLC (IC, 40%  $i\text{PrOH}$  in Hexanes, 1 mL/min, 254 nm):  $t_{\text{major}} = 11.6$  min,  $t_{\text{minor}} = 9.9$  min, 96% ee.

**Compound 5h:** White solid; Yield 89%;  $[\alpha]^{30}_D = +37.1$  ( $c = 0.5$  in  $\text{CHCl}_3$ ); IR (KBr)  $\nu_{\text{max}}$  ( $\text{cm}^{-1}$ ) 3415, 2977, 1736, 1613, 1520, 1492, 1335, 1297, 1165, 1114, 1070, 755;  $^1\text{H-NMR}$  (300 MHz,  $\text{CDCl}_3$ ),  $\delta$  (ppm) 8.34-8.18 (m, 2H), 6.93 (d,  $J = 8.6$  Hz, 1H), 6.45 (s, 1H), 4.15 (s, 1H), 3.32 (s, 3H), 2.28 (s, 3H), 2.23 (s, 3H), 1.31 (s, 9H);  $^{13}\text{C NMR}$  (75 MHz,  $\text{CDCl}_3$ ),  $\delta$  (ppm) 201.1, 200.8, 174.5, 153.7, 149.3, 143.5, 133.0, 132.1, 128.5, 126.7, 119.7, 108.0, 81.2, 68.4, 61.8, 32.1, 31.8, 28.1, 27.0; ESI-MS:  $m/z$ : 428 ( $\text{M}+\text{Na}$ ) $^+$ ; HPLC (IC, 30%  $i\text{PrOH}$  in Hexanes, 1 mL/min, 254 nm):  $t_{\text{major}} = 15.4$  min,  $t_{\text{minor}} = 9.8$  min, 92% ee.

**Compound 5i:** White solid; Yield 98%;  $[\alpha]^{30}_D = -18.6$  ( $c = 0.5$  in  $\text{CHCl}_3$ ); IR (KBr)  $\nu_{\text{max}}$  ( $\text{cm}^{-1}$ ) 3412, 2925, 1721, 1620, 1495, 1362, 1255, 1218, 1162, 1059, 1026, 758;  $^1\text{H-NMR}$  (300 MHz,  $\text{CDCl}_3$ ),  $\delta$  (ppm) 7.24-7.16 (m, 2H), 6.82 (d,  $J = 8.4$  Hz, 1H), 6.44 (s, 1H), 4.11 (s, 1H), 3.25 (s, 3H), 2.28 (s, 3H), 2.18 (s, 3H), 1.29 (s, 9H);  $^{13}\text{C NMR}$  (75 MHz,  $\text{CDCl}_3$ ),  $\delta$  (ppm) 201.1, 201.0, 174.0, 153.7, 144.7, 142.2, 129.5, 122.8, 118.1, 109.0, 80.8, 68.0, 62.5, 32.2, 32.0, 31.8, 29.6, 29.3, 28.0, 26.7; ESI-MS:  $m/z$ : 467 ( $\text{M}+\text{Na}$ ) $^+$ ; HPLC (IC, 40%  $i\text{PrOH}$  in Hexanes, 1 mL/min, 254 nm):  $t_{\text{major}} = 6.3$  min,  $t_{\text{minor}} = 5.4$  min, 97% ee.

**Compound 5j:** White solid; Yield 78%;  $[\alpha]^{30}_D = +8.9$  ( $c = 0.1$  in  $\text{CHCl}_3$ ); IR (KBr)  $\nu_{\text{max}}$  ( $\text{cm}^{-1}$ ) 3362, 2924, 1721, 1694, 1601, 1508, 1454, 1350, 1319, 1254, 1154, 1114, 1039, 805;  $^1\text{H-NMR}$

(300 MHz, CDCl<sub>3</sub>),  $\delta$  (ppm) 7.16 (d,  $J = 8.7$  Hz, 1H), 6.85 (d,  $J = 8.8$  Hz, 1H), 6.36 (s, 1H), 4.47 (s, 1H), 3.63 (s, 3H), 2.31 (s, 3H), 2.08 (s, 3H), 1.29 (s, 9H); <sup>13</sup>C NMR (75 MHz, CDCl<sub>3</sub>),  $\delta$  (ppm) 203.3, 202.0, 173.6, 153.0, 142.3, 133.1, 128.0, 124.0, 114.6, 80.7, 66.0, 62.6, 32.2, 31.8, 31.4, 30.1, 29.6, 29.3, 28.0; ESI-MS:  $m/z$ : 451 (M+Na)<sup>+</sup>; HPLC (IC, 35% iPrOH in Hexanes, 1 mL/min, 254 nm):  $t_{\text{major}} = 12.8$  min,  $t_{\text{minor}} = 9.6$  min, 94% ee.

**Compound 5k:** White solid; Yield 90%;  $[\alpha]_{\text{D}}^{30} = -23.7$  ( $c = 0.5$  in CHCl<sub>3</sub>); IR (KBr)  $\nu_{\text{max}}$  (cm<sup>-1</sup>) 3291, 2924, 1755, 1725, 1613, 1523, 1466, 1381, 1244, 1163, 1015, 751; <sup>1</sup>H-NMR (300 MHz, CDCl<sub>3</sub>),  $\delta$  (ppm) 7.37 (d,  $J = 7.3$  Hz, 1H), 7.31 (t,  $J = 7.7$  Hz, 1H), 7.03 (t,  $J = 7.6$  Hz, 1H), 6.83 (d,  $J = 7.7$  Hz, 1H), 6.32 (s, 1H), 3.96 (s, 1H), 3.70 (s, 3H), 3.69 (s, 3H), 3.25 (s, 3H), 1.27 (s, 9H); <sup>13</sup>C NMR (75 MHz, CDCl<sub>3</sub>),  $\delta$  (ppm) 173.8, 166.3, 166.0, 153.7, 144.0, 129.6, 127.6, 123.8, 122.6, 108.2, 80.3, 60.7, 55.2, 53.0, 28.0, 26.6; ESI-MS:  $m/z$ : 415 (M+Na)<sup>+</sup>; HPLC (IC, 30% iPrOH in Hexanes, 1 mL/min, 254 nm):  $t_{\text{major}} = 18.4$  min,  $t_{\text{minor}} = 13.9$  min, 97% ee.

**Compound 5l:** White solid; Yield 93%;  $[\alpha]_{\text{D}}^{30} = -23.5$  ( $c = 0.5$  in CHCl<sub>3</sub>); IR (KBr)  $\nu_{\text{max}}$  (cm<sup>-1</sup>) 3433, 2981, 1724, 1682, 1610, 1451, 1372, 1348, 1287, 1246, 1162, 1026, 758, 692; <sup>1</sup>H-NMR (300 MHz, CDCl<sub>3</sub>),  $\delta$  (ppm) 7.87 (d,  $J = 7.3$  Hz, 2H), 7.68 (d,  $J = 7.3$  Hz, 2H), 7.56-7.51 (m, 1H), 7.48 (t,  $J = 7.3, 7.4$  Hz, 2H), 7.41 (t,  $J = 7.4, 8.2$  Hz, 2H), 7.35 (t,  $J = 7.4, 8.2$  Hz, 2H), 7.27-7.23 (m, 1H), 6.96 (t,  $J = 8.1$  Hz, 1H), 6.79 (s, 1H), 6.75 (d,  $J = 7.6$  Hz, 1H), 5.87 (s, 1H), 2.98 (s, 3H), 1.26 (s, 9H); <sup>13</sup>C NMR (75 MHz, CDCl<sub>3</sub>),  $\delta$  (ppm) 192.5, 192.2, 174.2, 153.8, 143.0, 136.6, 136.4, 133.7, 129.2, 128.8, 128.6, 128.4, 125.4, 122.8, 108.1, 80.1, 63.8, 57.1, 29.6, 28.0, 26.1; ESI-MS:  $m/z$ : 507 (M+Na)<sup>+</sup>; HPLC (AD-H, 30% iPrOH in Hexanes, 1 mL/min, 254 nm):  $t_{\text{major}} = 10.2$  min,  $t_{\text{minor}} = 9.2$  min, 96% ee.

**Compound 5m:** White solid; Yield 91%;  $[\alpha]_{\text{D}}^{30} = -25.5$  ( $c = 0.5$  in CHCl<sub>3</sub>); IR (KBr)  $\nu_{\text{max}}$  (cm<sup>-1</sup>) 3428, 2925, 1710, 1609, 1491, 1370, 1341, 1280, 1158, 1055, 1027, 765; <sup>1</sup>H-NMR (300 MHz, CDCl<sub>3</sub>),  $\delta$  (ppm) 7.39 (d,  $J = 7.3$  Hz, 0.5H), 7.31 (t,  $J = 7.7$  Hz, 1.5H), 7.02 (t,  $J = 7.7$  Hz, 1H), 6.83 (d,  $J = 7.8$  Hz, 1H), 6.36 (s, 0.5H), 6.29 (s, 0.5H), 4.08 (s, 0.5H), 3.96 (s, 0.5H), 3.71 (s, 1.5H), 3.68 (s, 1.5H), 3.25 (s, 1.5H), 3.24 (s, 1.5H), 2.26 (s, 1.5H), 2.17 (s, 1.5H), 1.27 (s, 9H); <sup>13</sup>C NMR (75 MHz, CDCl<sub>3</sub>),  $\delta$  (ppm) 200.0, 174.1, 166.5, 153.6, 143.9, 129.6, 127.8, 123.9, 122.7, 108.3, 80.3, 61.6, 60.4, 52.9, 32.1, 31.1, 29.6, 28.0, 26.6; ESI-MS:  $m/z$ : 399 (M+Na)<sup>+</sup>; HPLC (IC, 30% iPrOH in Hexanes, 1.0 mL/min, 254 nm): major diastereomer:  $t_{\text{major}} = 28.5$  min,  $t_{\text{minor}} = 15.6$  min, 97% ee, minor diastereomer:  $t_{\text{major}} = 34.1$  min,  $t_{\text{minor}} = 17.3$  min, 95% ee.

**Compound 5n:** White solid; Yield 95%;  $[\alpha]_{\text{D}}^{30} = -40.1$  ( $c = 0.5$  in CHCl<sub>3</sub>); IR (KBr)  $\nu_{\text{max}}$  (cm<sup>-1</sup>) 3415, 2978, 1722, 1612, 1494, 1369, 1250, 1166, 1093, 1022, 755; <sup>1</sup>H-NMR (300 MHz, CDCl<sub>3</sub>),  $\delta$  (ppm) 7.42 (d,  $J = 7.4$  Hz, 0.5H), 7.31 (dd,  $J = 7.9, 16.6$  Hz, 1.5H), 7.02 (t,  $J = 7.4$  Hz, 1H), 6.83 (d,  $J = 7.8$  Hz, 1H), 6.42 (s, 0.5H), 6.34 (s, 0.5H), 4.17-4.09 (m, 2.5H), 3.97 (s, 0.5H), 3.24 (s, 3H), 2.27 (s, 1.5H), 2.18 (s, 1.5H), 1.26 (s, 9H), 1.16 (t,  $J = 7.1$  Hz, 3H); <sup>13</sup>C NMR (75 MHz, CDCl<sub>3</sub>),  $\delta$  (ppm) 200.6, 174.0, 166.0, 153.5, 144.0, 129.5, 128.0, 123.8, 122.5, 108.1, 80.1, 62.0, 60.6, 32.0, 31.0, 29.5, 28.0, 26.4, 13.7; ESI-MS:  $m/z$ : 413 (M+Na)<sup>+</sup>; HPLC (AD-H, 5% iPrOH in

Hexanes, 1.0 mL/min, 254 nm): major diastereomer:  $t_{\text{major}} = 54.7$  min,  $t_{\text{minor}} = 52.7$  min, 99% ee, minor diastereomer:  $t_{\text{major}} = 40.9$  min,  $t_{\text{minor}} = 29.7$  min, 97% ee.

**Compound 5o:** White solid; Yield 92%;  $[\alpha]_{\text{D}}^{30} = -48.2$  ( $c = 0.4$  in  $\text{CHCl}_3$ ); IR (KBr)  $\nu_{\text{max}}$  ( $\text{cm}^{-1}$ ) 3433, 2980, 1715, 1611, 1498, 1368, 1282, 1253, 1162, 1130, 1025, 756;  $^1\text{H-NMR}$  (300 MHz,  $\text{CDCl}_3$ ),  $\delta$  (ppm) 7.46 (d,  $J = 7.5$  Hz, 0.5H), 7.35 (d,  $J = 7.5$  Hz, 0.5H), 7.30 (t,  $J = 7.7$  Hz, 1H), 7.02 (t,  $J = 7.5$  Hz, 1H), 6.81 (d,  $J = 7.7$  Hz, 1H), 6.36 (s, 0.5H), 6.26 (s, 0.5H), 3.97 (s, 0.5H), 3.86 (s, 0.5H), 3.24 (s, 3H), 2.28 (s, 1.5H), 2.21 (s, 1.5H), 1.31 (s, 9H), 1.27 (s, 9H);  $^{13}\text{C NMR}$  (75 MHz,  $\text{CDCl}_3$ ),  $\delta$  (ppm) 201.3, 174.1, 164.9, 153.6, 143.9, 129.4, 124.6, 124.0, 122.6, 122.5, 108.1, 83.4, 80.2, 63.0, 62.3, 61.7, 31.6, 30.8, 28.1, 27.5, 26.5; ESI-MS:  $m/z$ : 441 ( $\text{M}+\text{Na}$ ) $^+$ ; HPLC (IC, 25% iPrOH in Hexanes, 1.0 mL/min, 254 nm): major diastereomer:  $t_{\text{major}} = 23.5$  min,  $t_{\text{minor}} = 12.4$  min, 89% ee, minor diastereomer:  $t_{\text{major}} = 31.2$  min,  $t_{\text{minor}} = 17.1$  min, 90% ee.

**Compound 5p:** White solid; Yield 96%;  $[\alpha]_{\text{D}}^{30} = -62.7$  ( $c = 0.5$  in  $\text{CHCl}_3$ ); IR (KBr)  $\nu_{\text{max}}$  ( $\text{cm}^{-1}$ ) 3403, 2925, 1713, 1674, 1611, 1455, 1353, 1254, 1171, 1025, 754, 691;  $^1\text{H-NMR}$  (300 MHz,  $\text{CDCl}_3$ ),  $\delta$  (ppm) 7.76 (d,  $J = 7.3$  Hz, 2H), 7.56 (t,  $J = 7.3$  Hz, 1H), 7.41 (t,  $J = 7.7$  Hz, 2H), 7.26-7.23 (m, 1H), 7.18 (d,  $J = 7.4$  Hz, 1H), 7.03 (s, 1H), 6.91 (t,  $J = 7.4$  Hz, 1H), 6.78 (d,  $J = 7.7$  Hz, 1H), 4.80 (s, 1H), 3.12 (s, 3H), 2.37 (s, 3H), 1.27 (s, 9H);  $^{13}\text{C NMR}$  (75 MHz,  $\text{CDCl}_3$ ),  $\delta$  (ppm) 200.9, 194.1, 173.9, 153.7, 143.1, 136.5, 134.2, 129.4, 128.8, 128.6, 123.9, 122.8, 108.2, 80.3, 63.5, 31.3, 28.0, 26.4; ESI-MS:  $m/z$ : 445 ( $\text{M}+\text{Na}$ ) $^+$ ; HPLC (IC, 25% iPrOH in Hexanes, 1.0 mL/min, 254 nm): major diastereomer:  $t_{\text{major}} = 35.8$  min,  $t_{\text{minor}} = 15.7$  min, 95% ee, minor diastereomer:  $t_{\text{major}} = 13.0$  min,  $t_{\text{minor}} = 11.6$  min, 82% ee.

## References:

1) (a) J. P. Malerich, K. Hagihara and V. H. Rawal, *J. Am. Chem. Soc.*, 2008, **130**, 14416; (b) W. Yang and D. -M. Du, *Org. Lett.*, 2010, **12**, 5450; (c) K. S. Rao, R. Trivedi and M. L. Kantam, *Synlett*, 2015, **26**, 221; (d) K. S. Rao, P. Ramesh, R. Trivedi and M. L. Kantam, *Tetrahedron Lett.*, 2016, **57**, 1227.

### 3) $^1\text{H}$ NMR, $^{13}\text{C}$ NMR spectra of products 4a-g and 5a-p

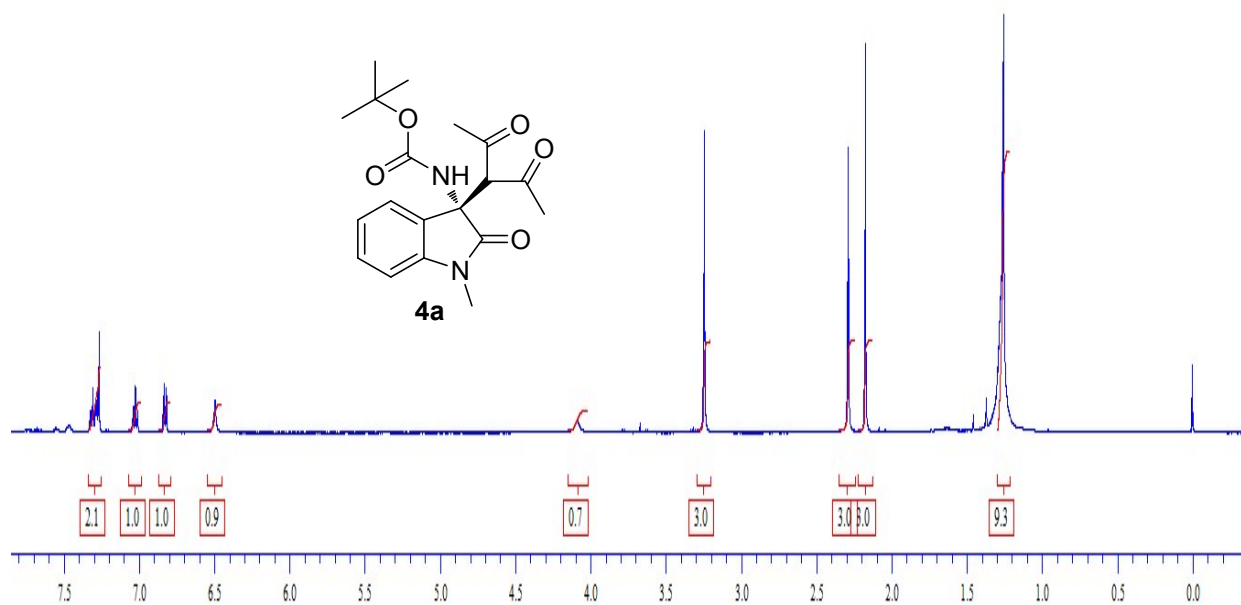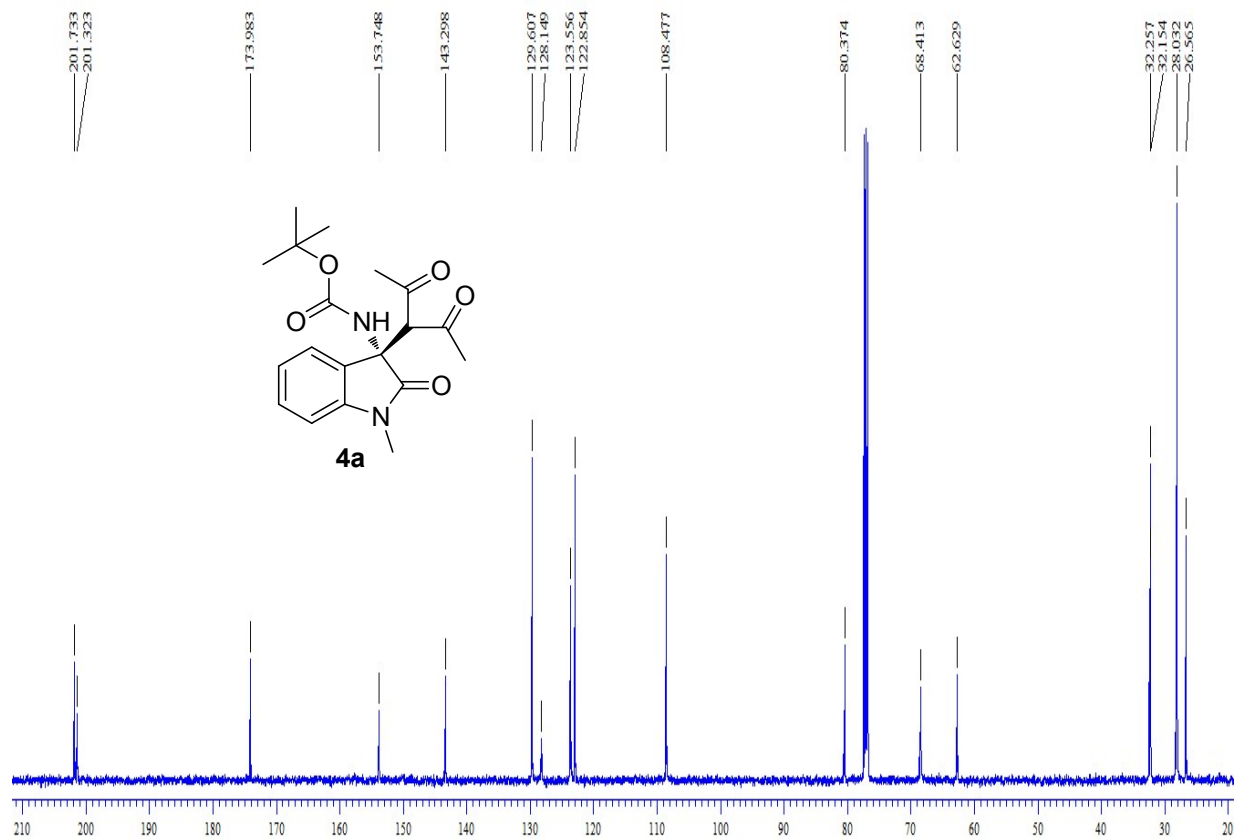



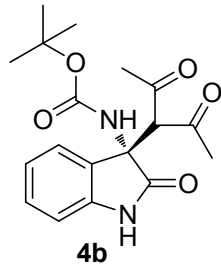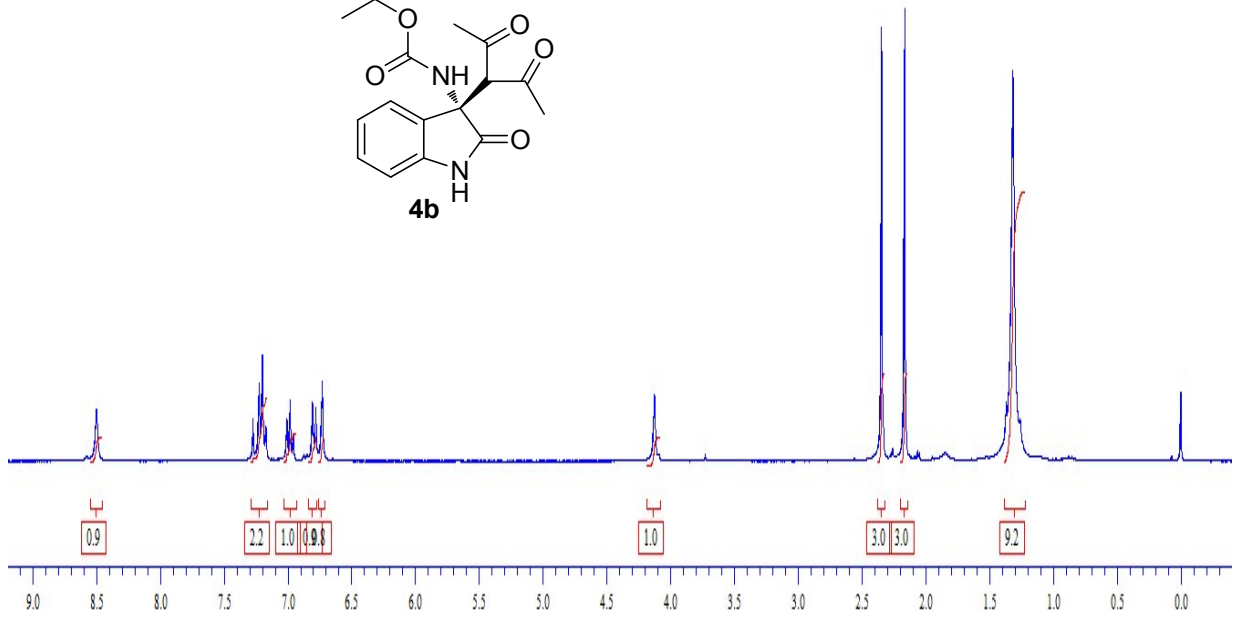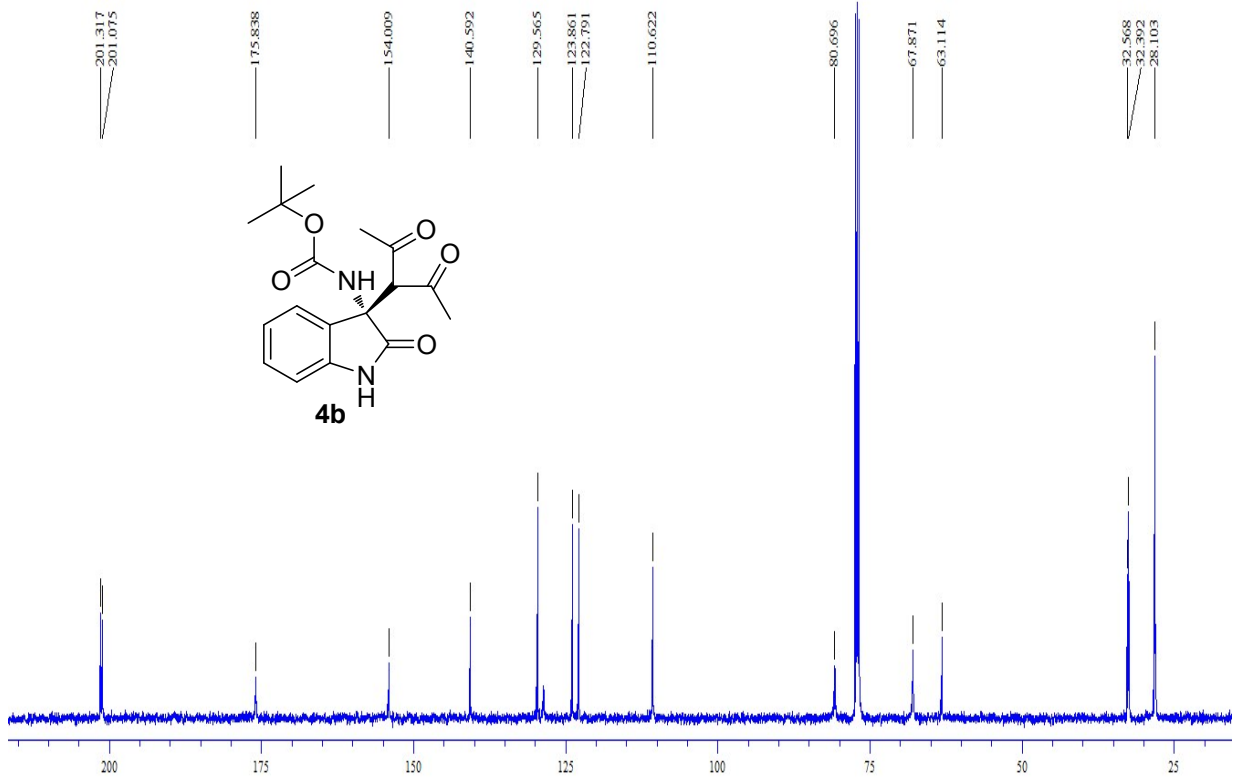

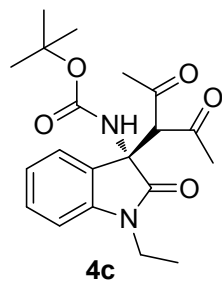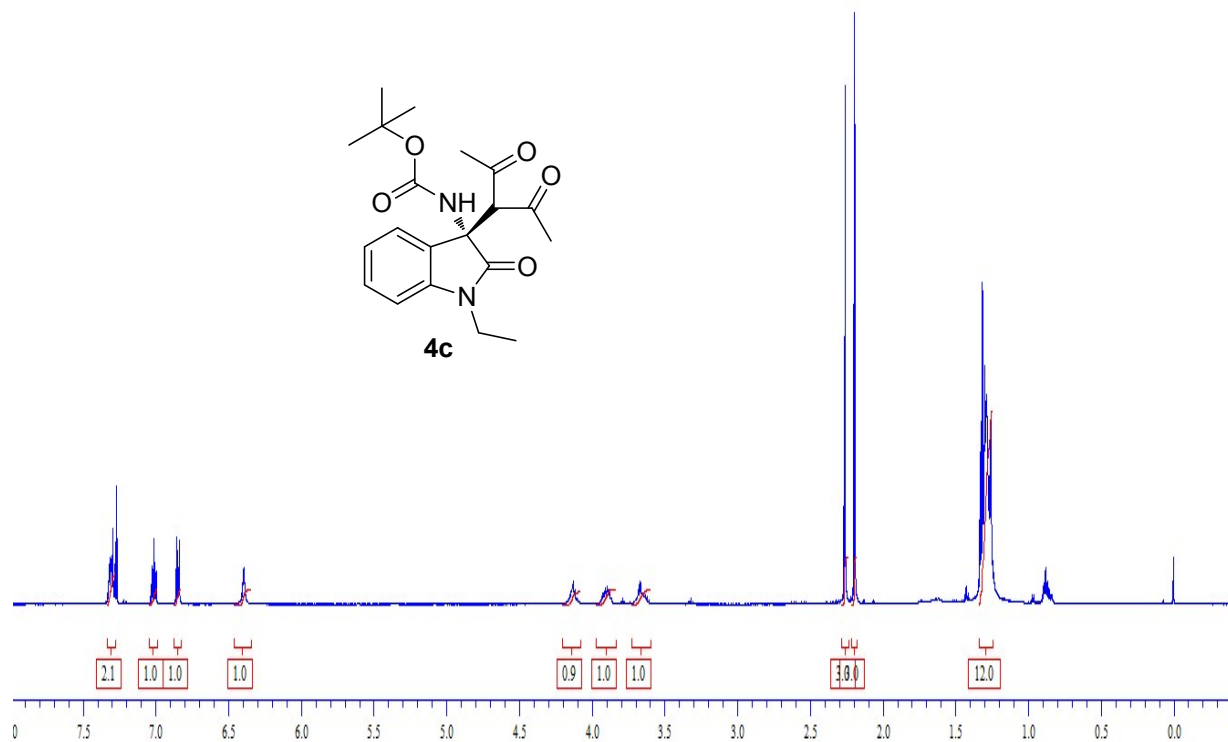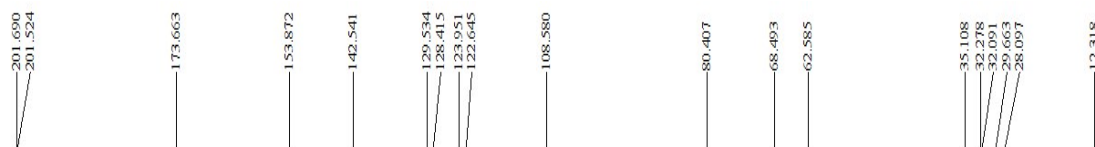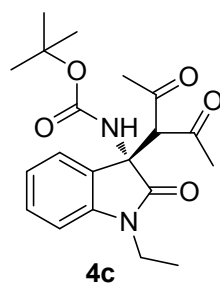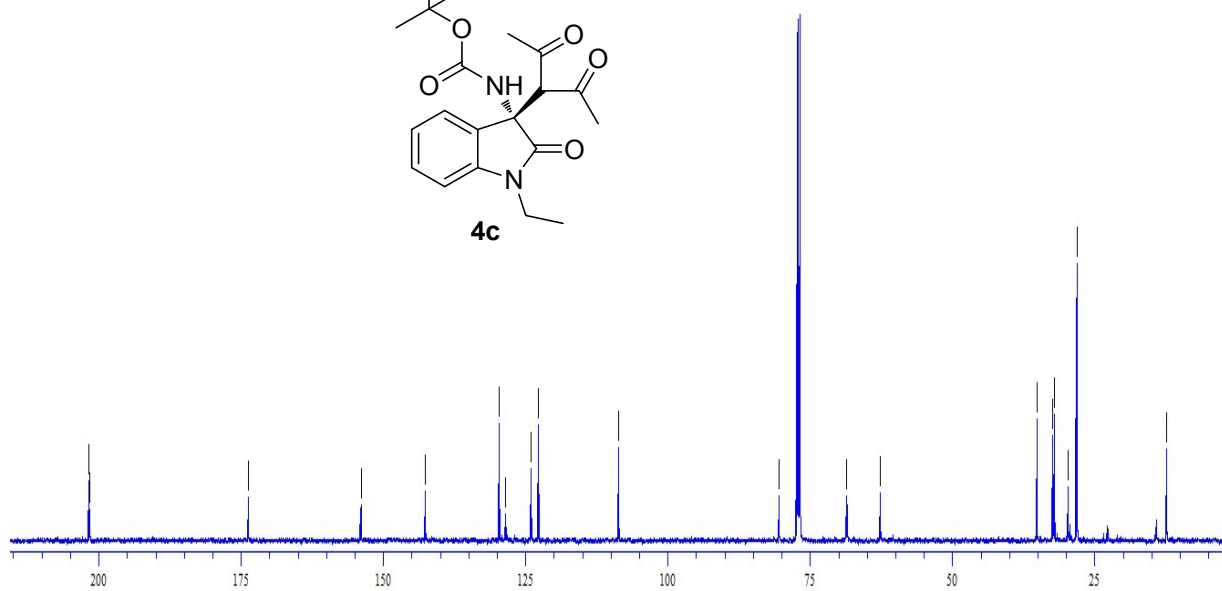

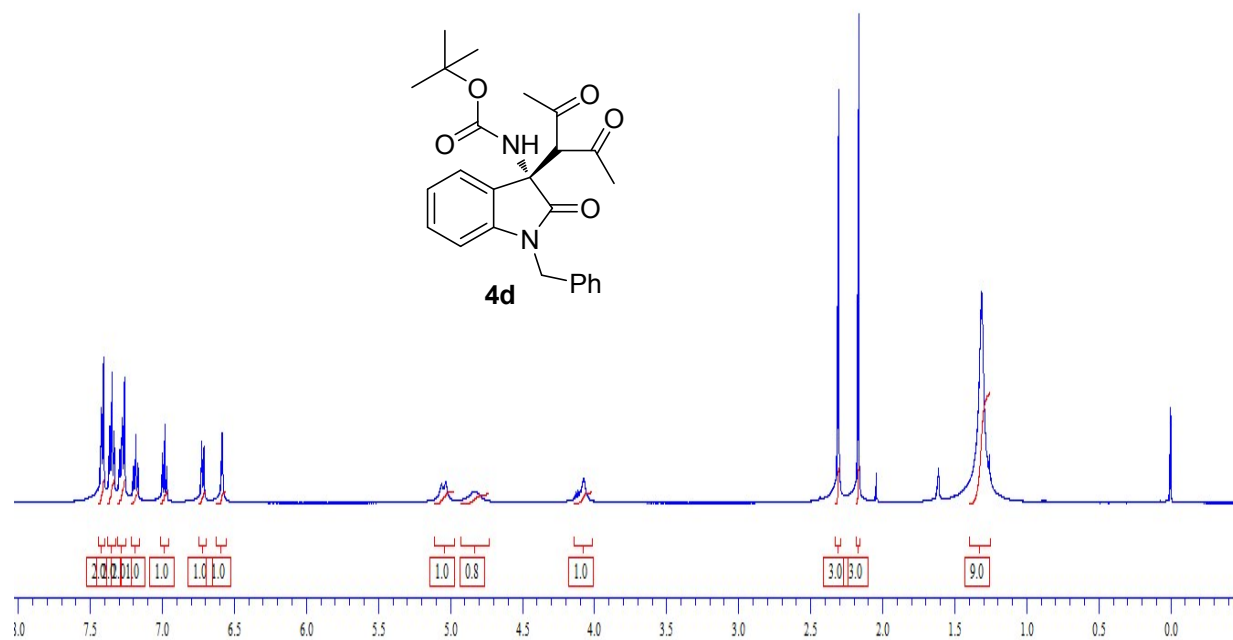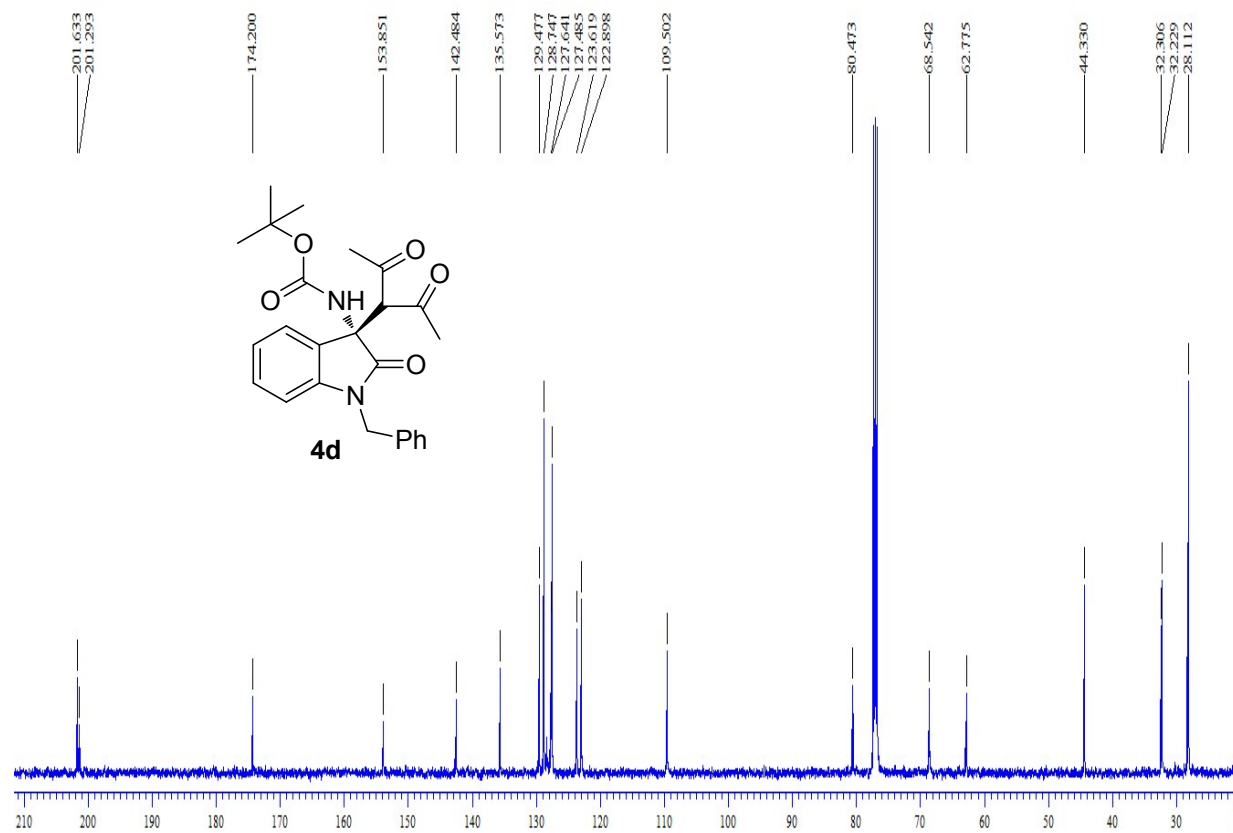

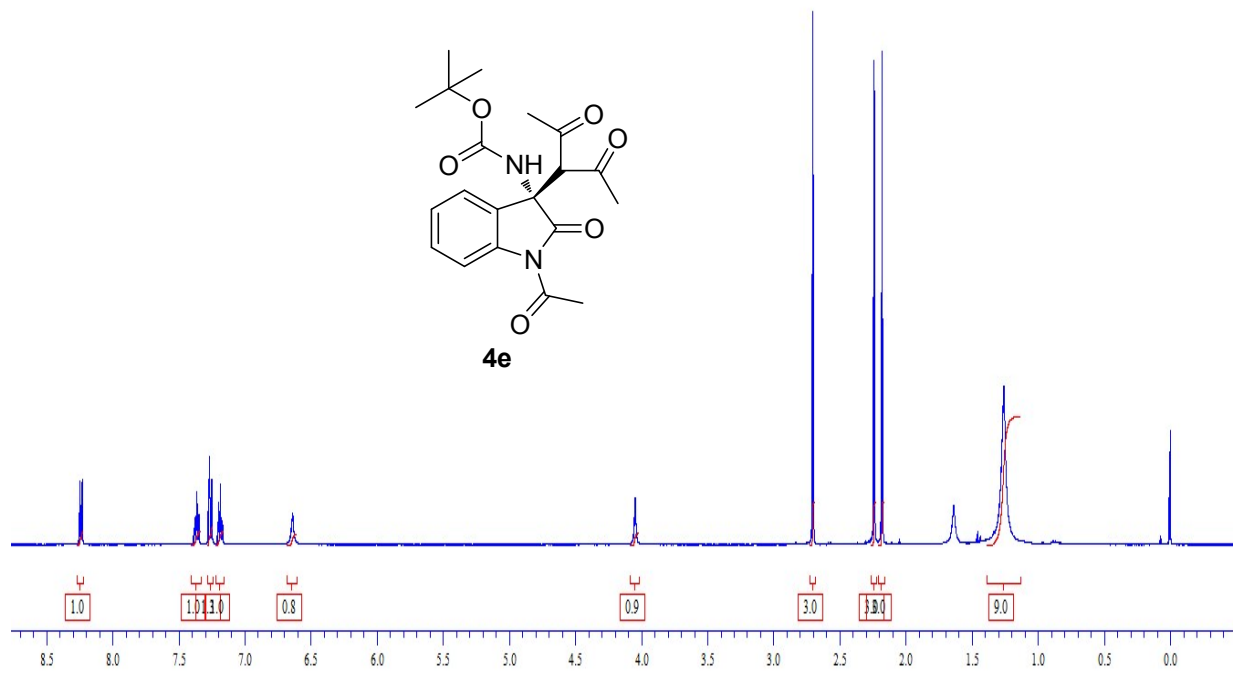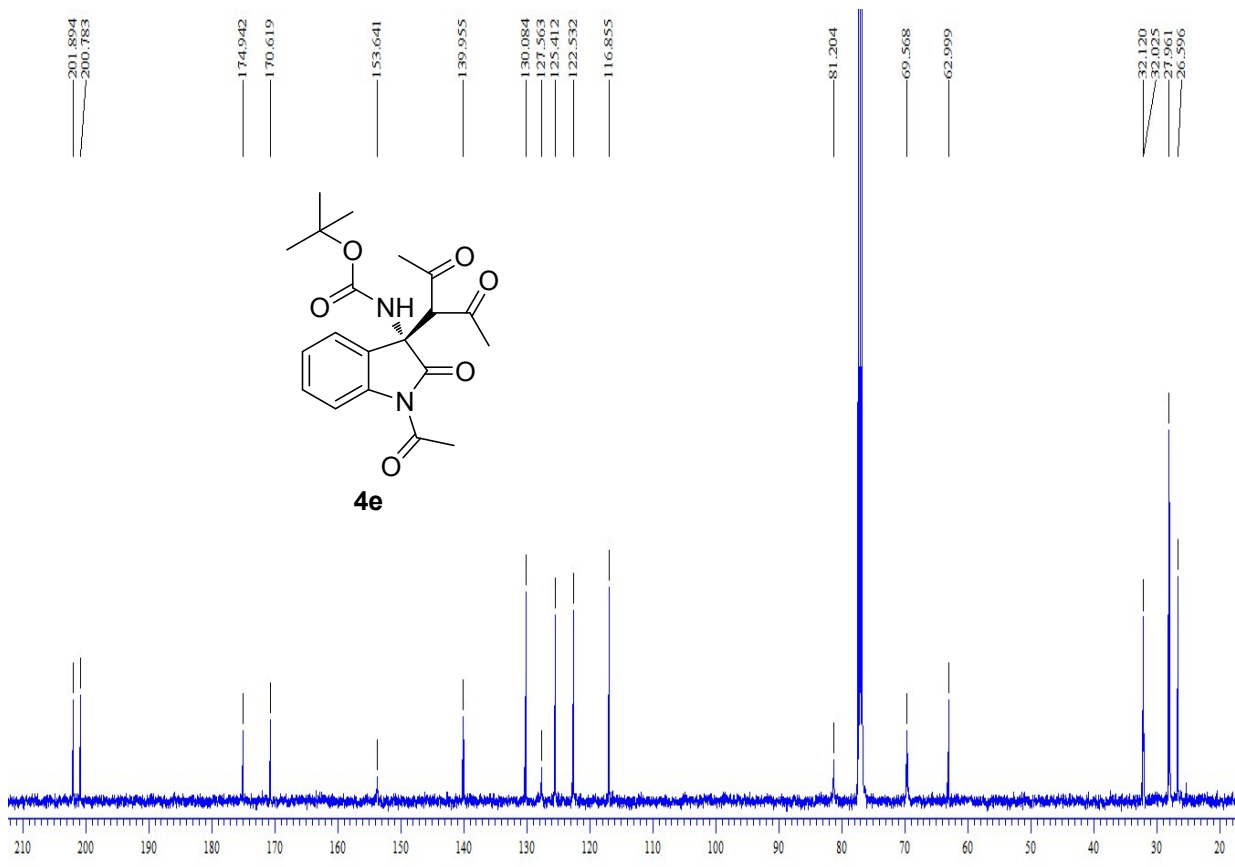

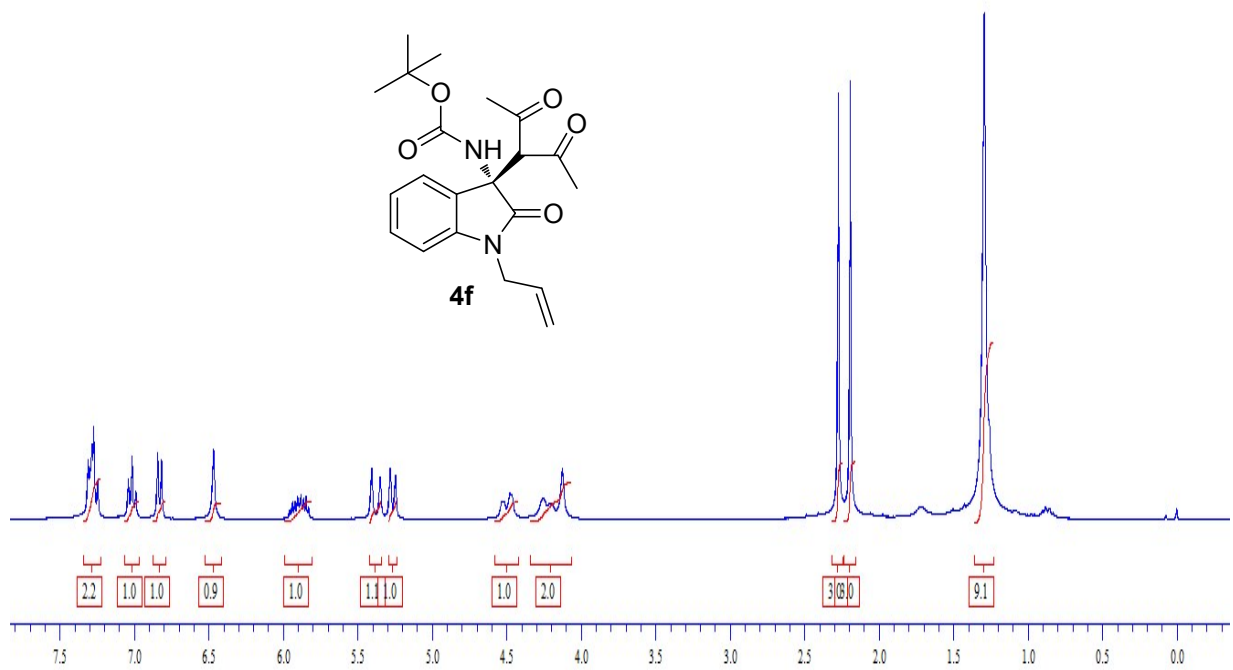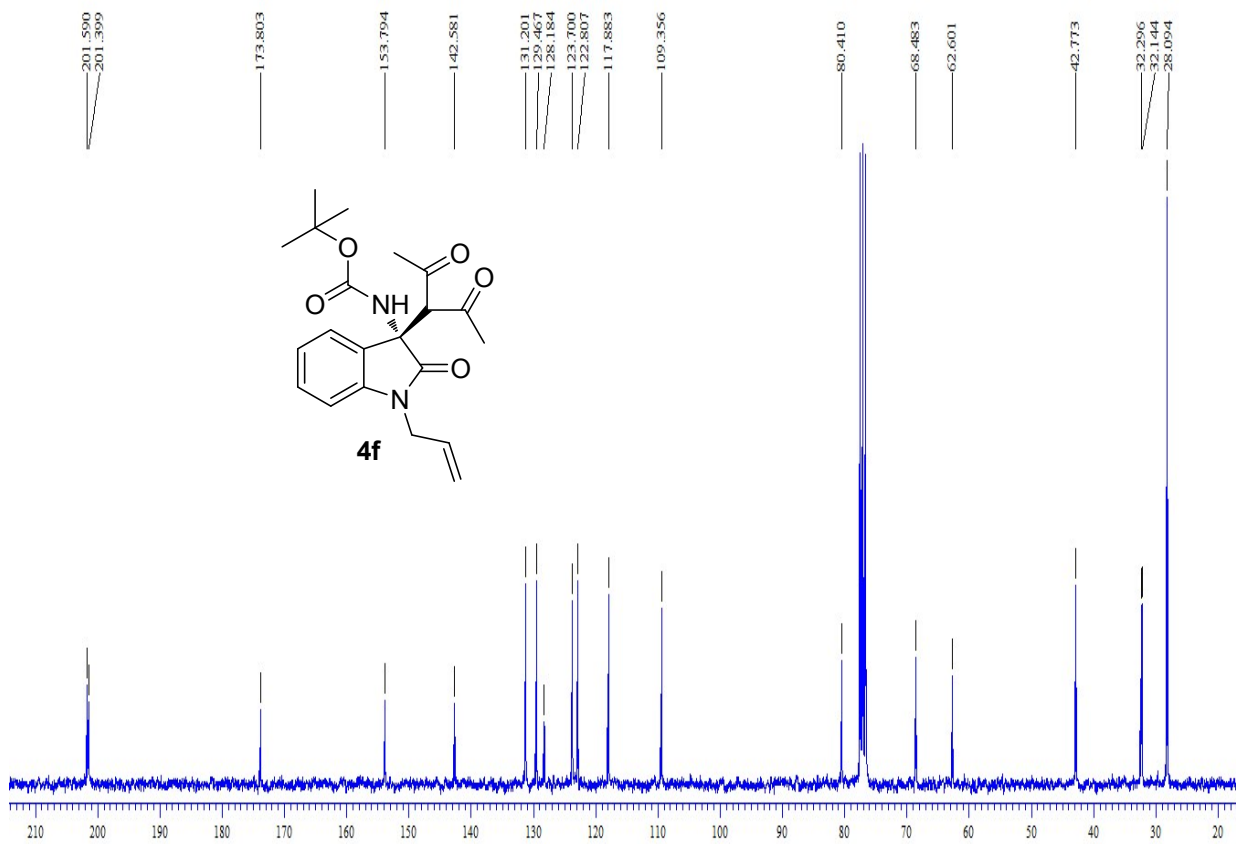

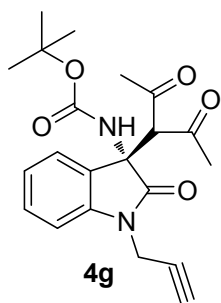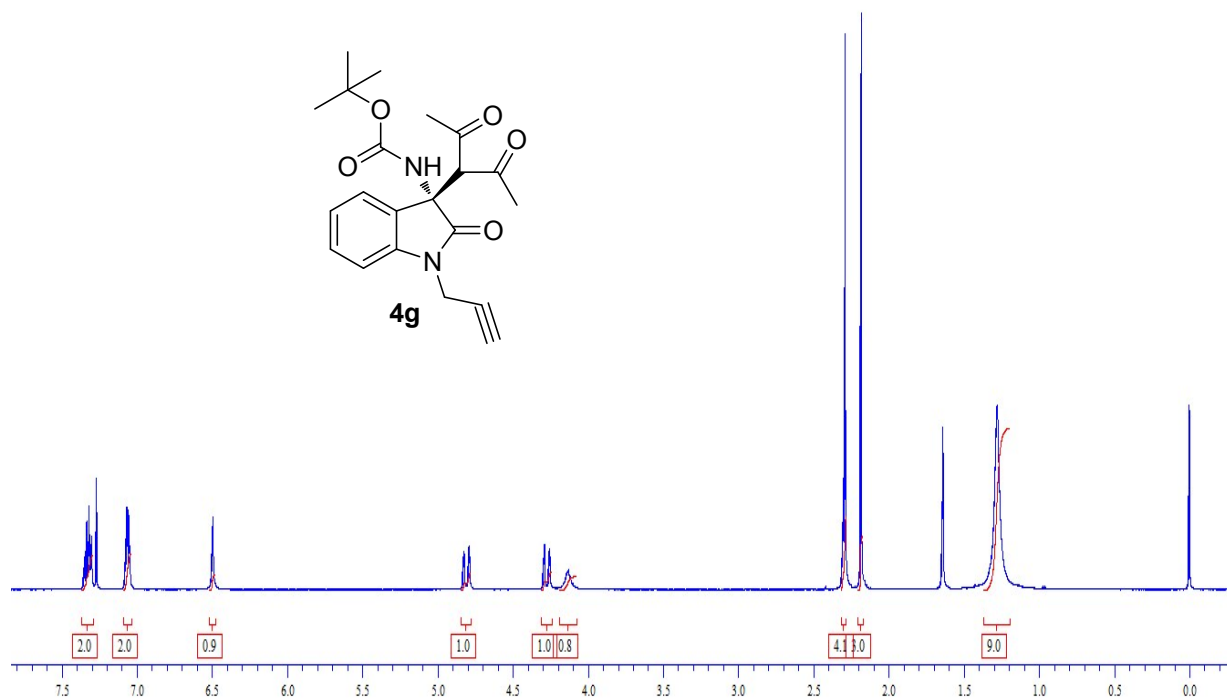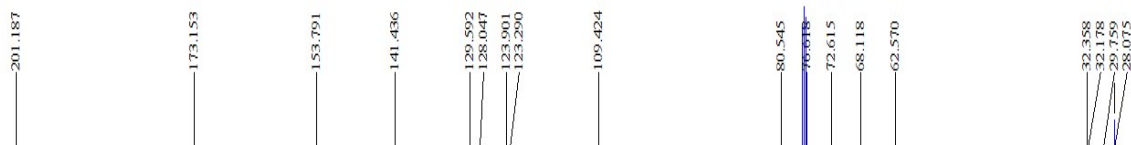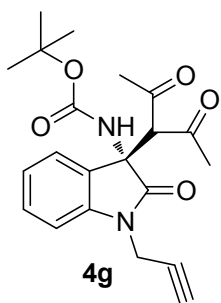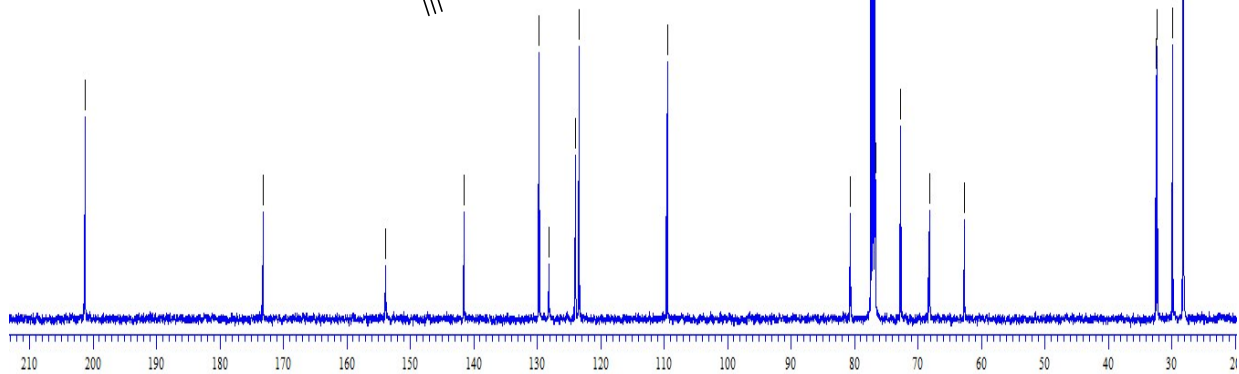

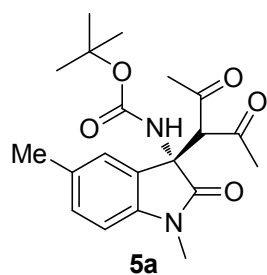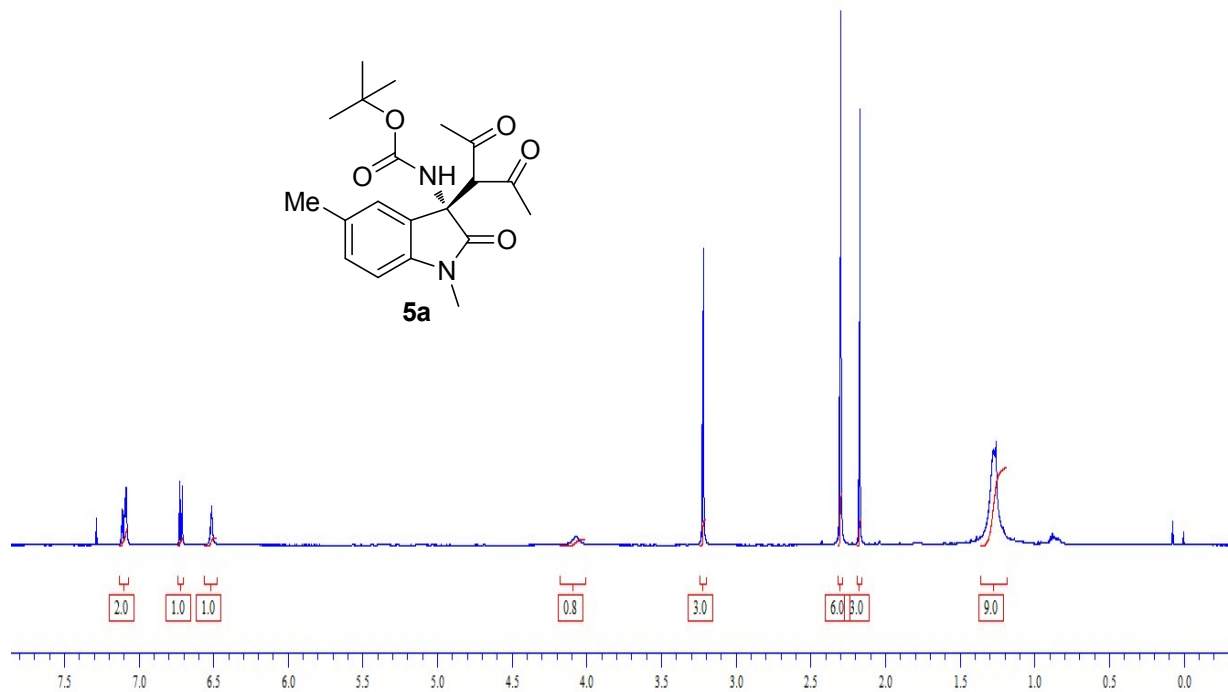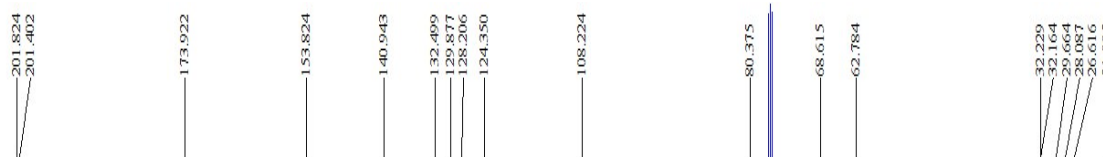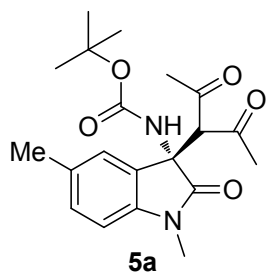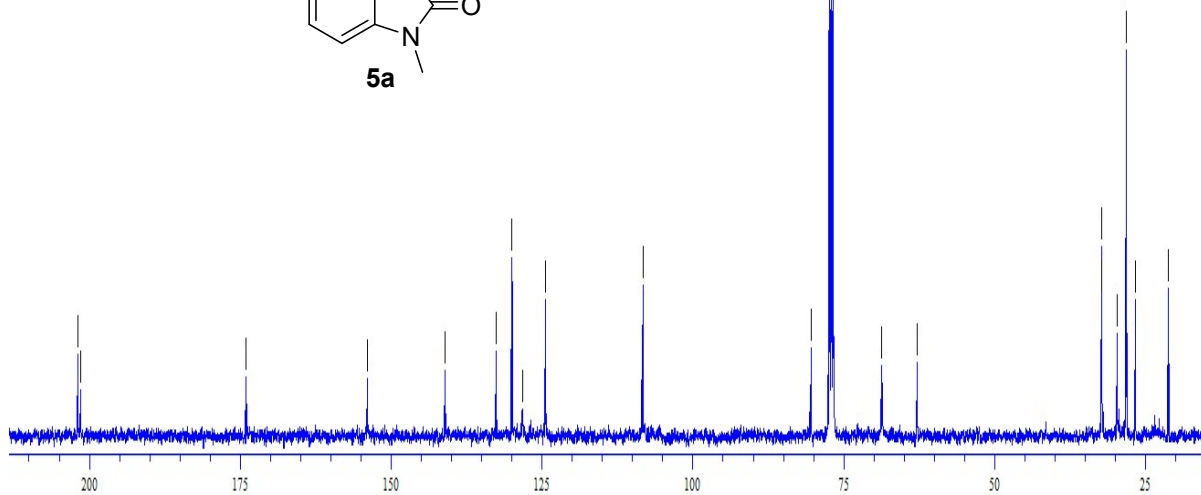

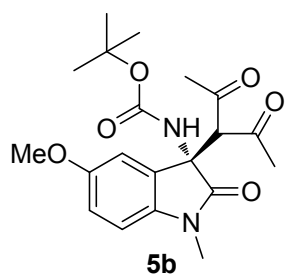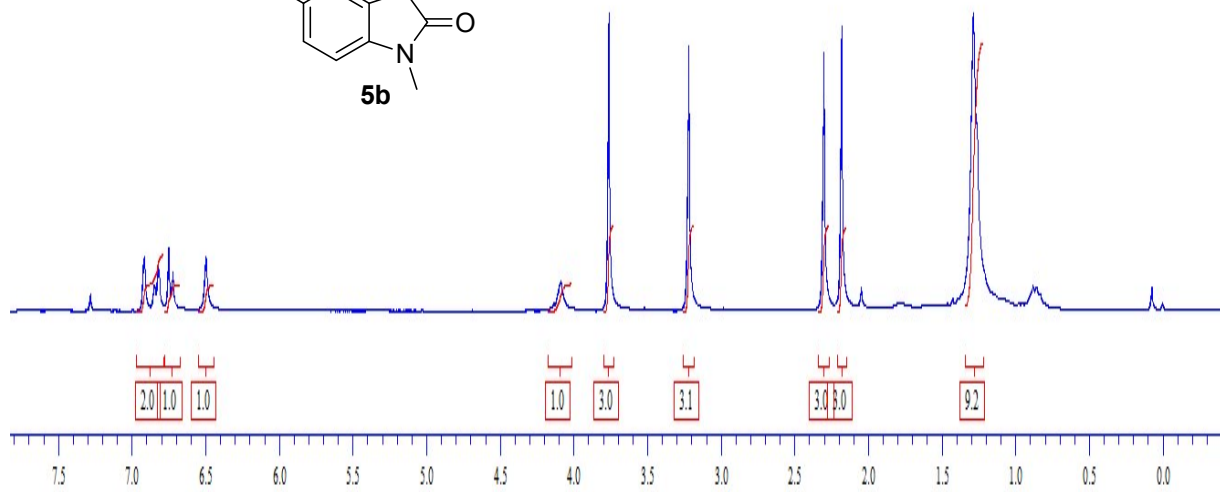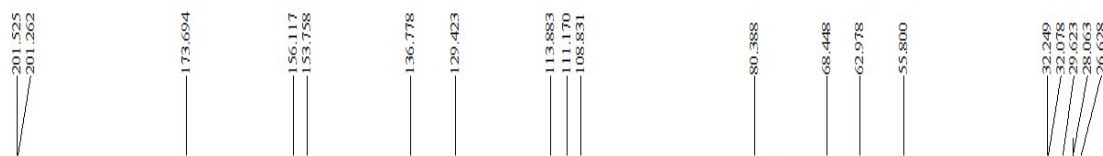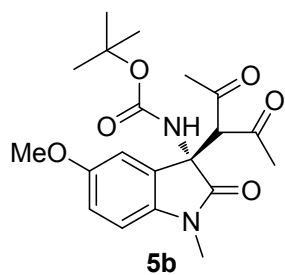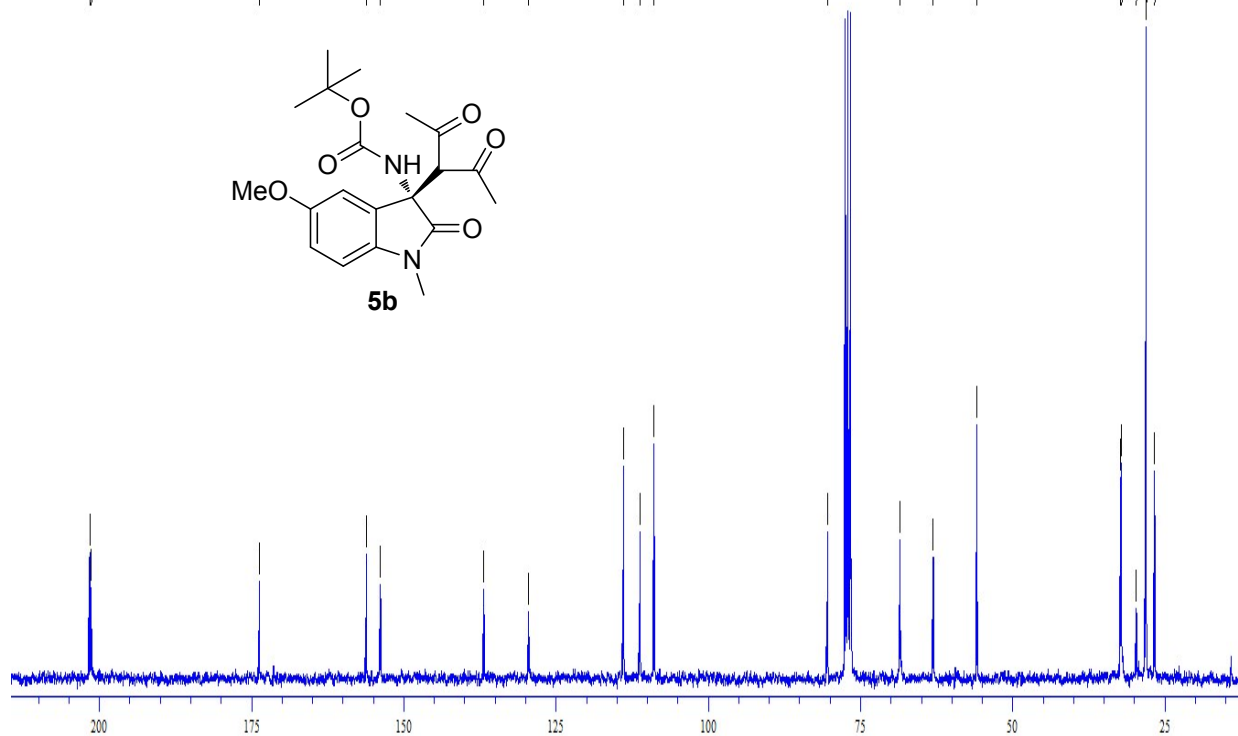



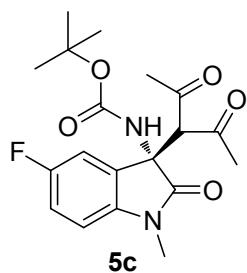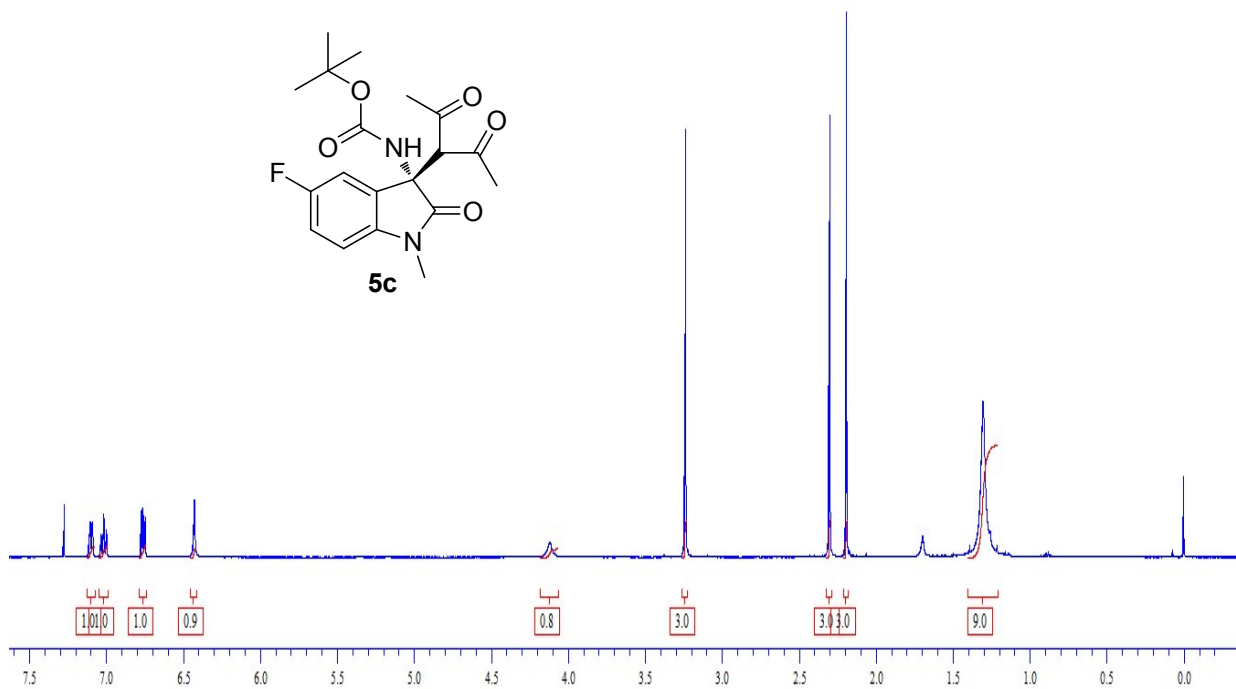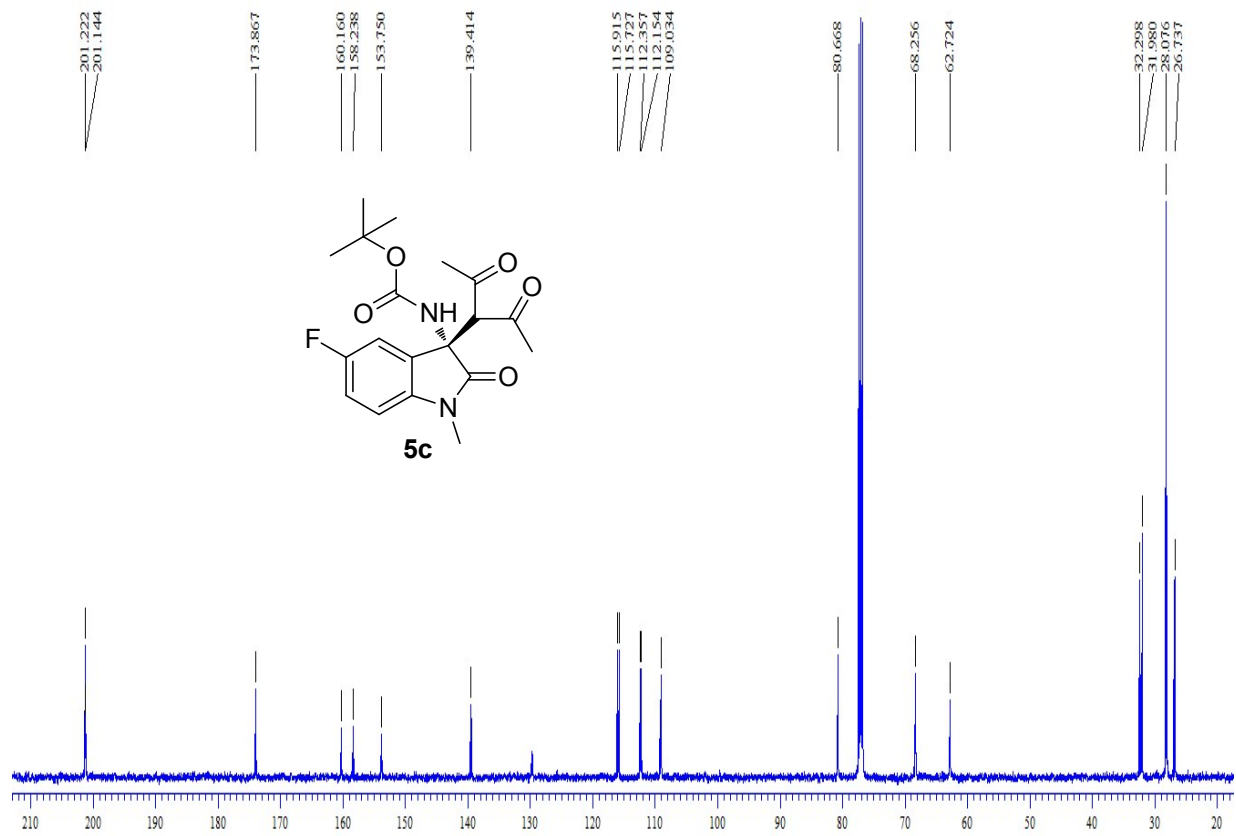

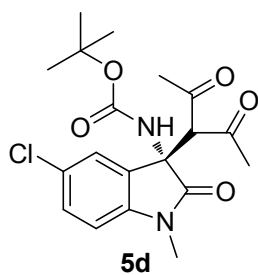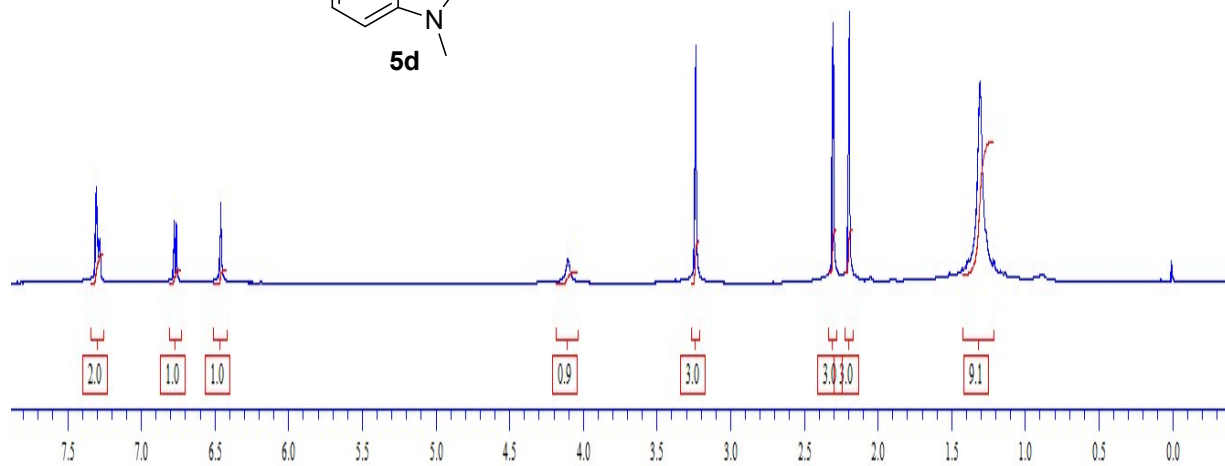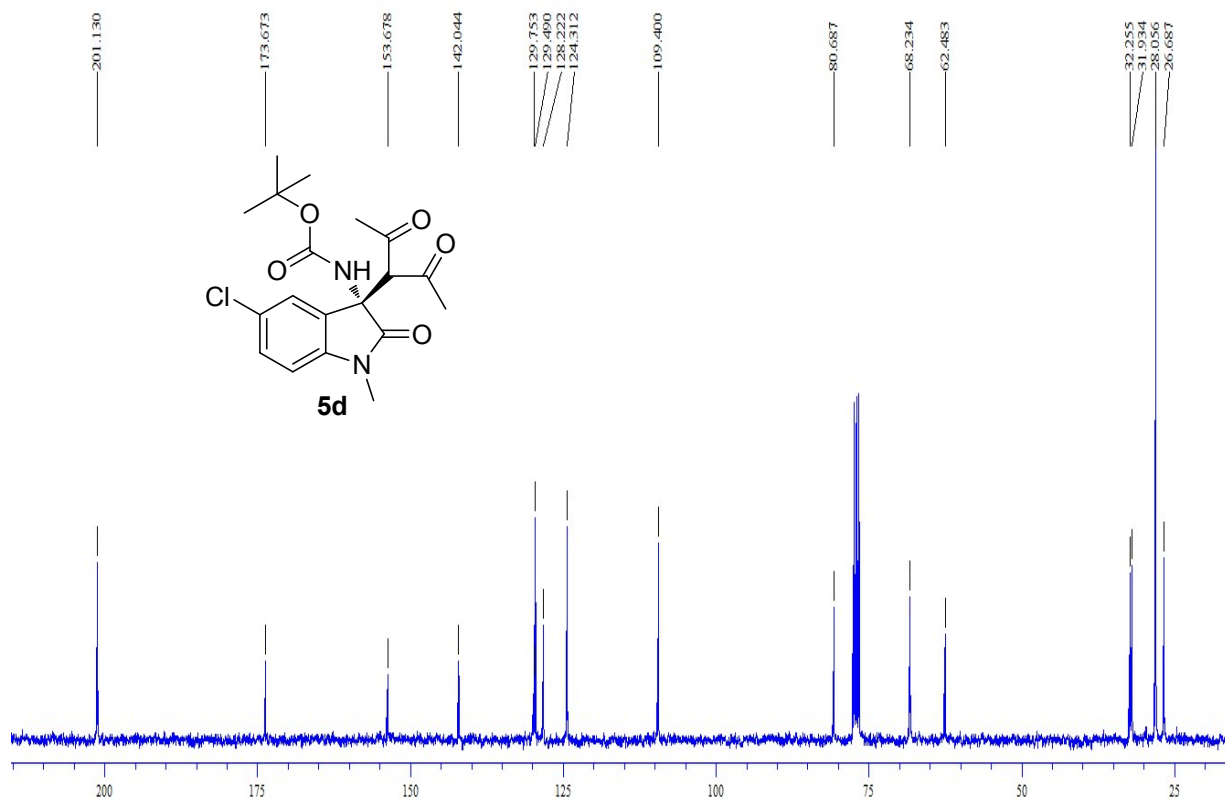

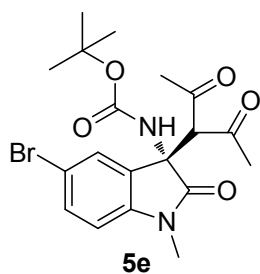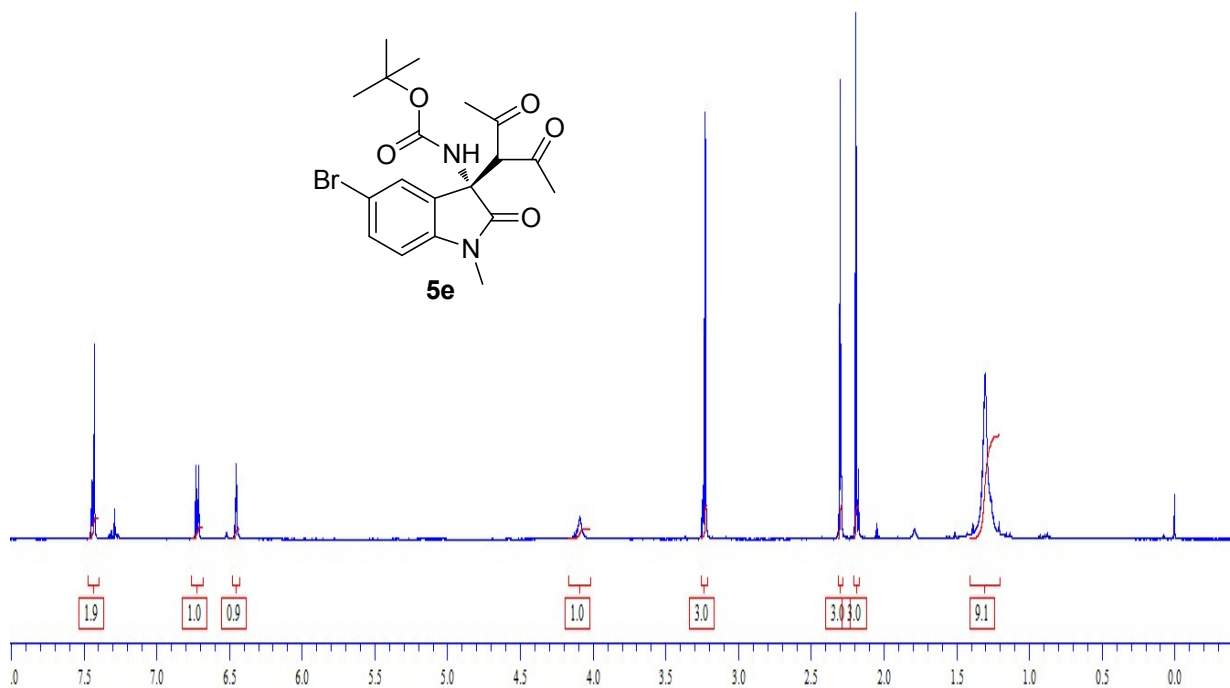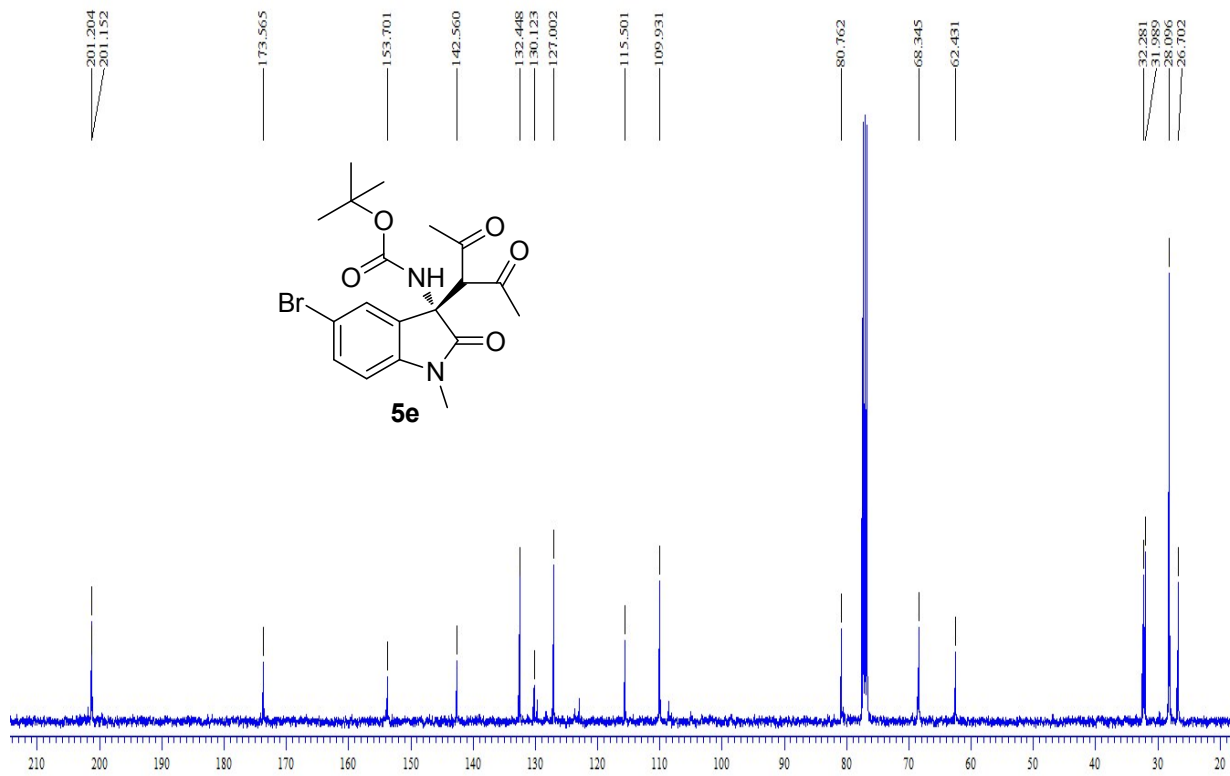

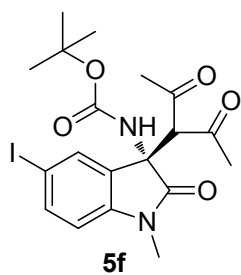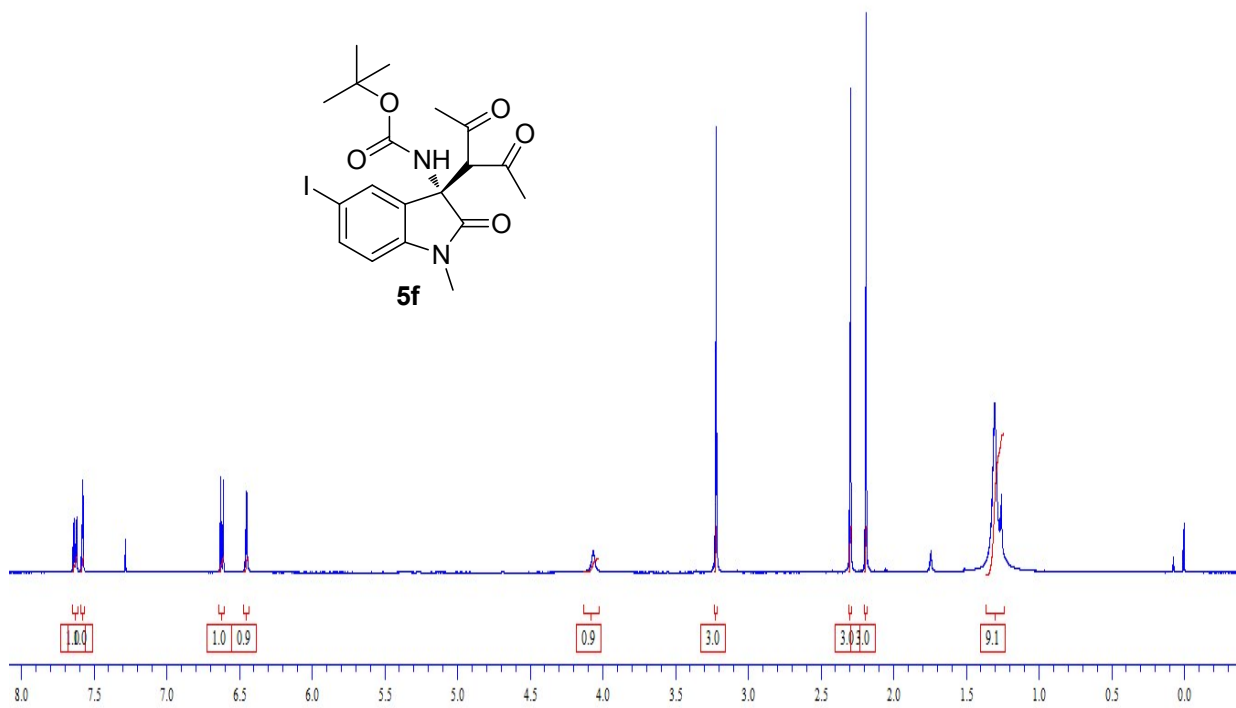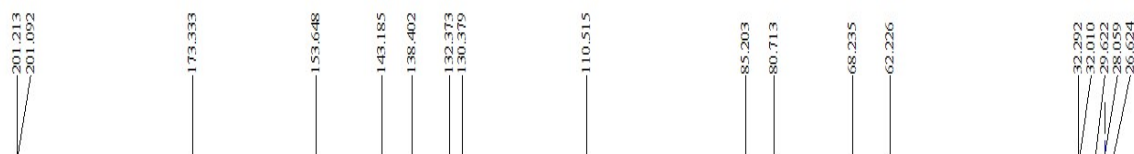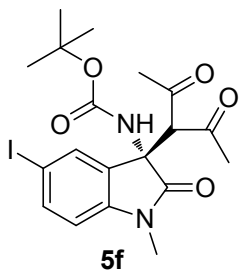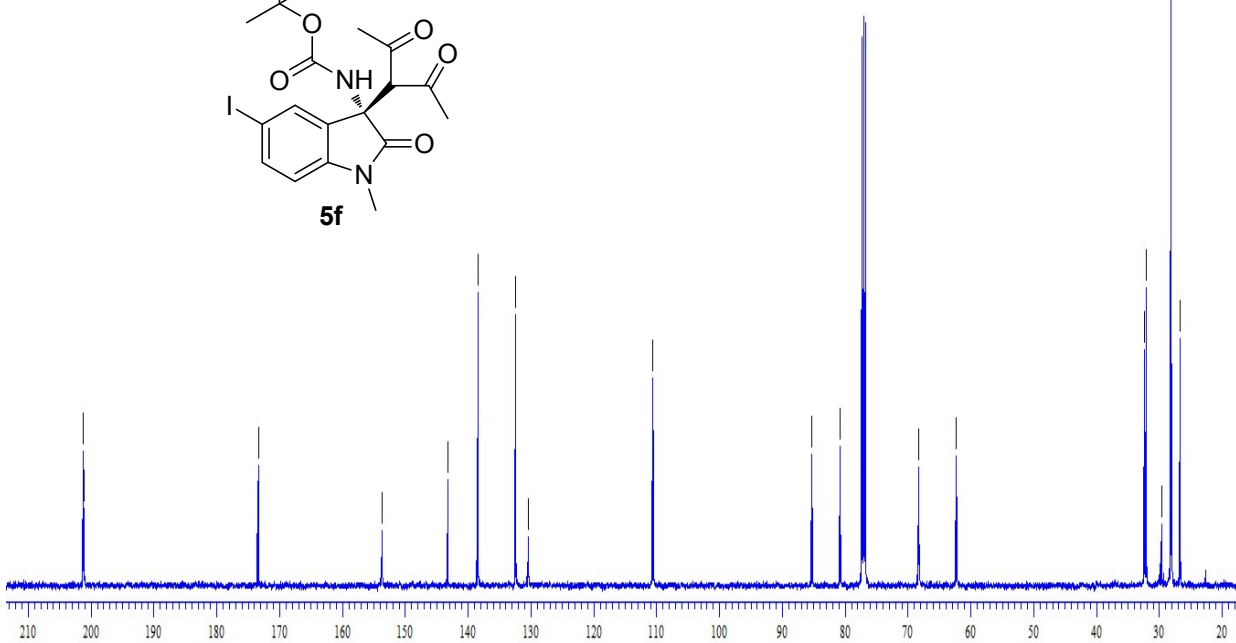

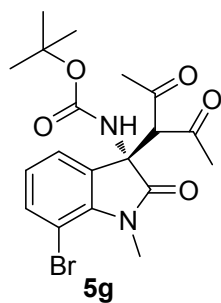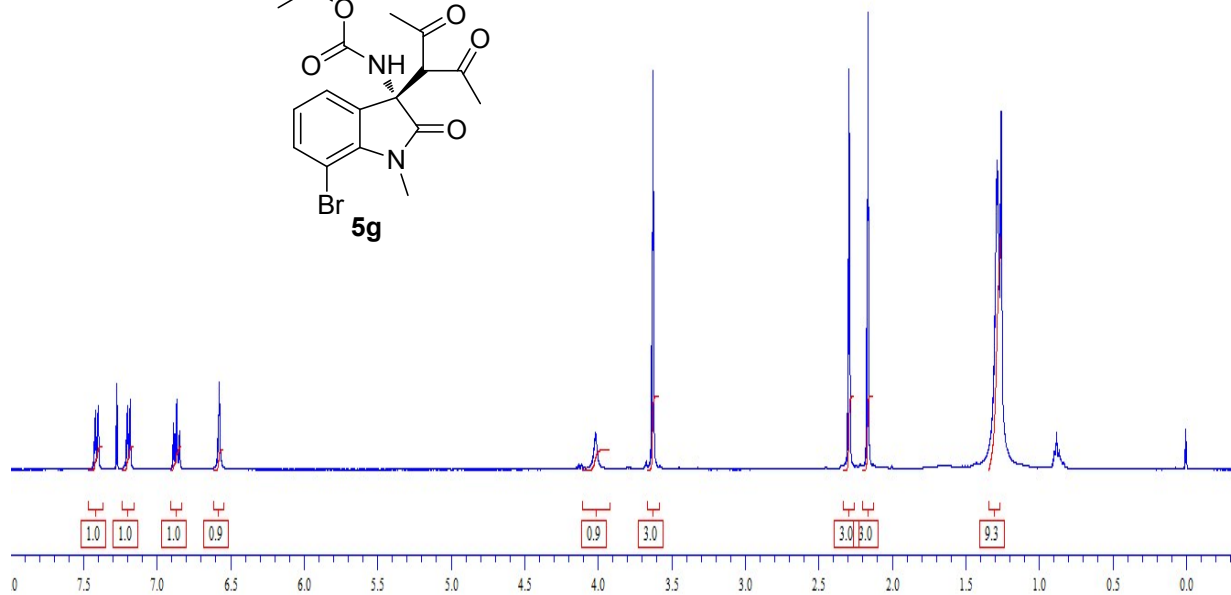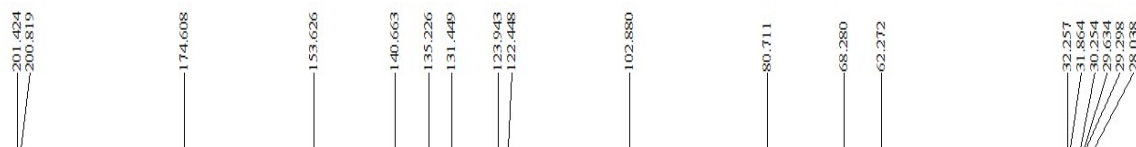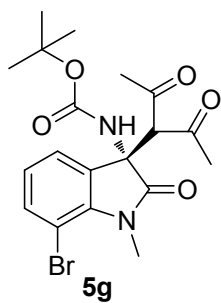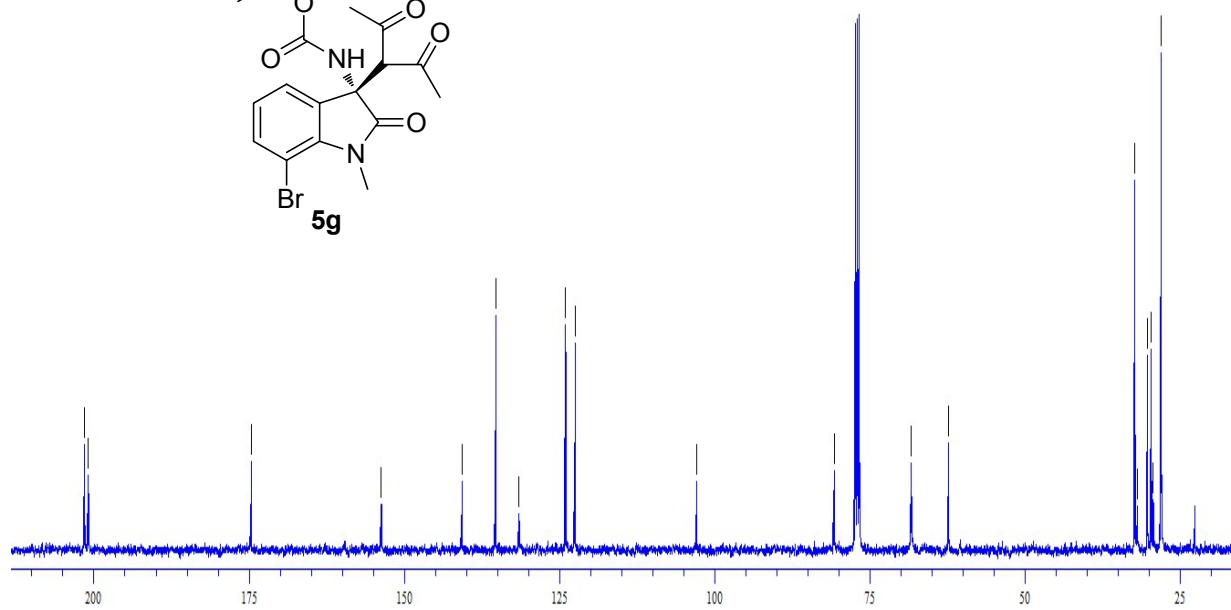

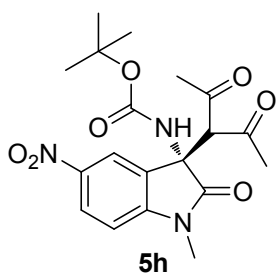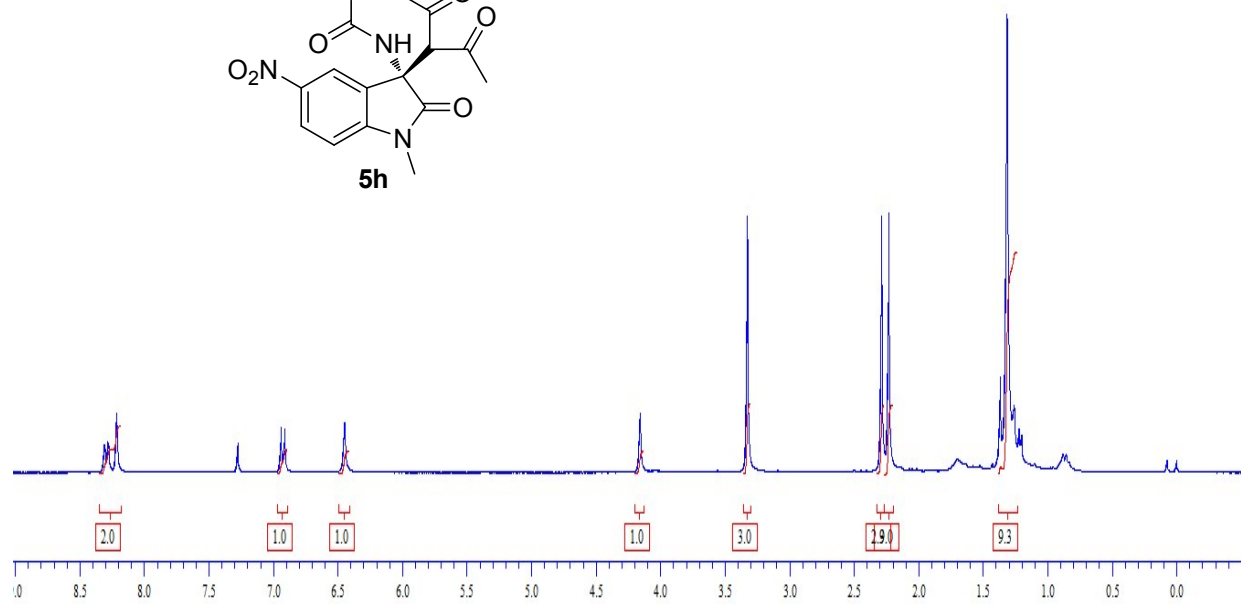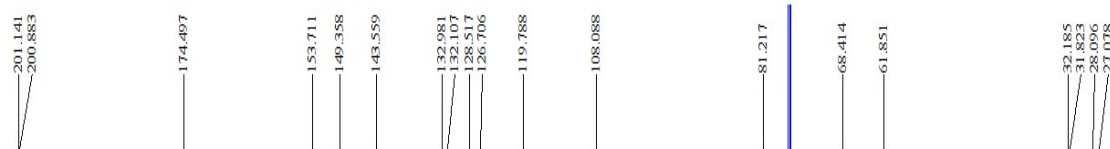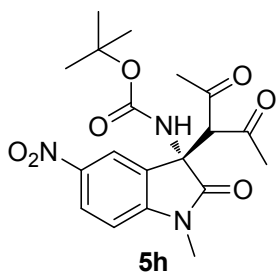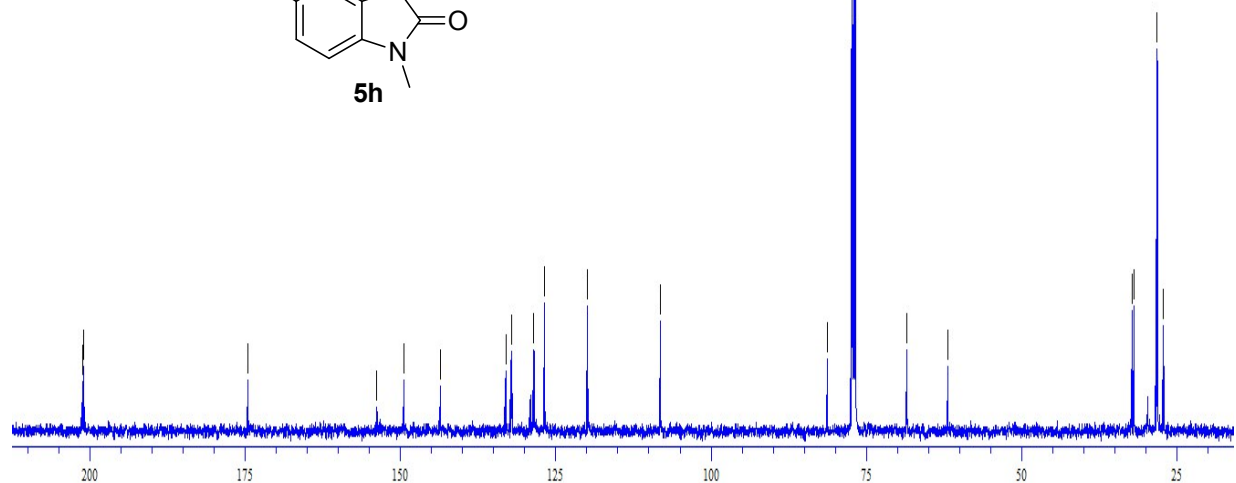

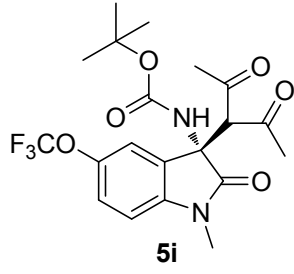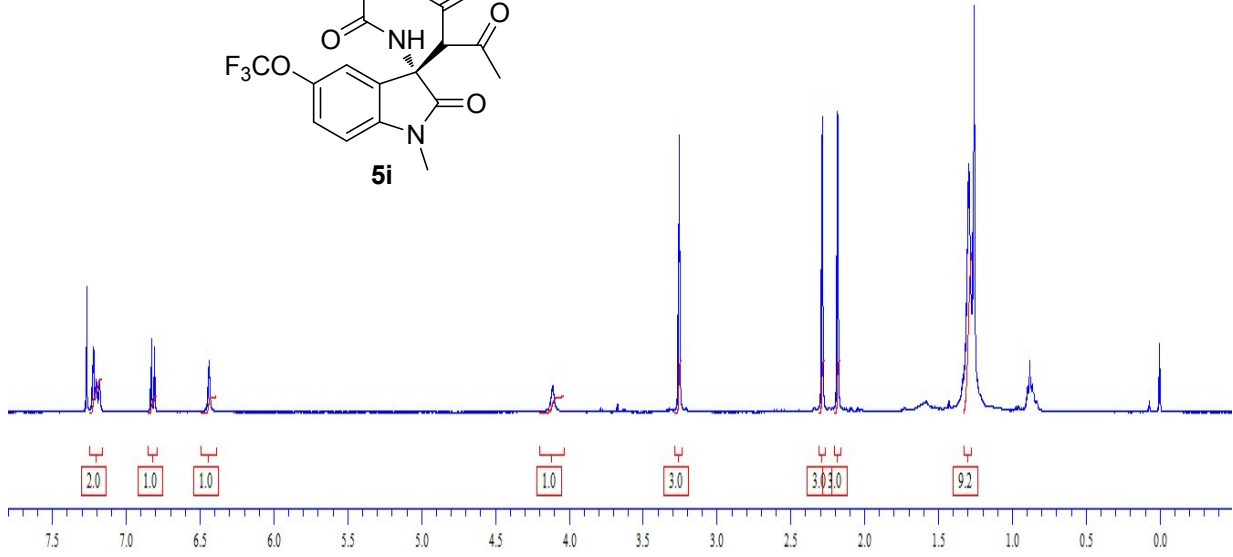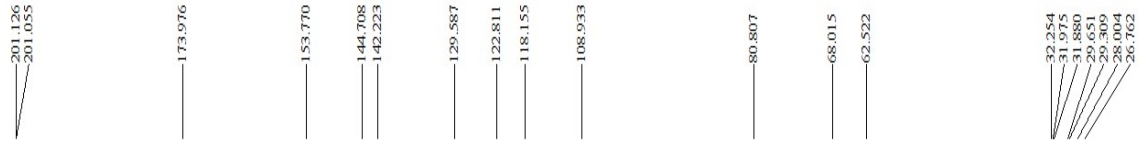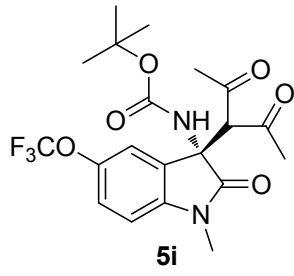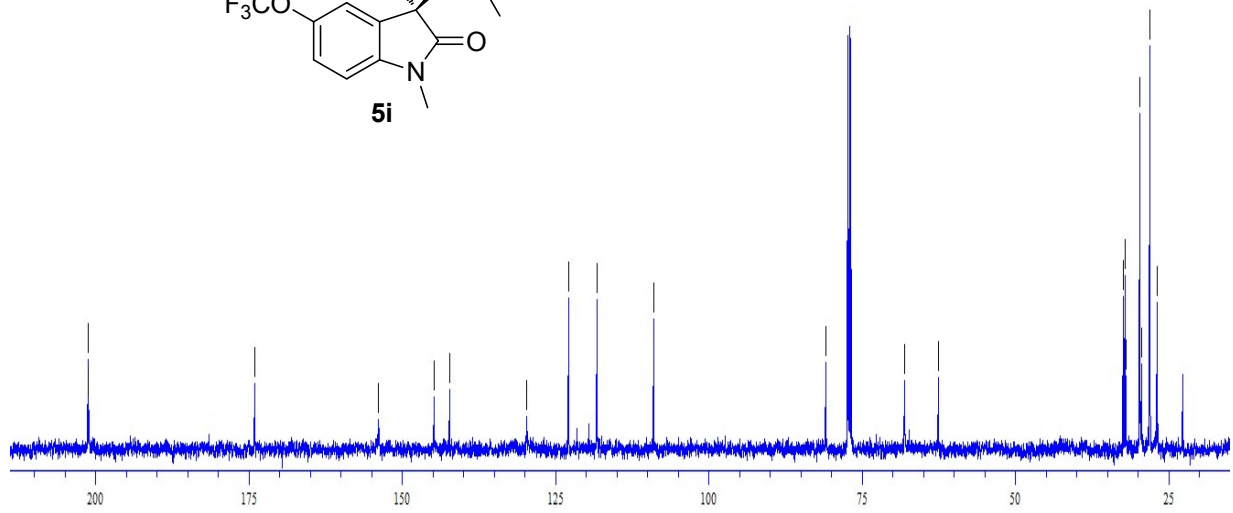

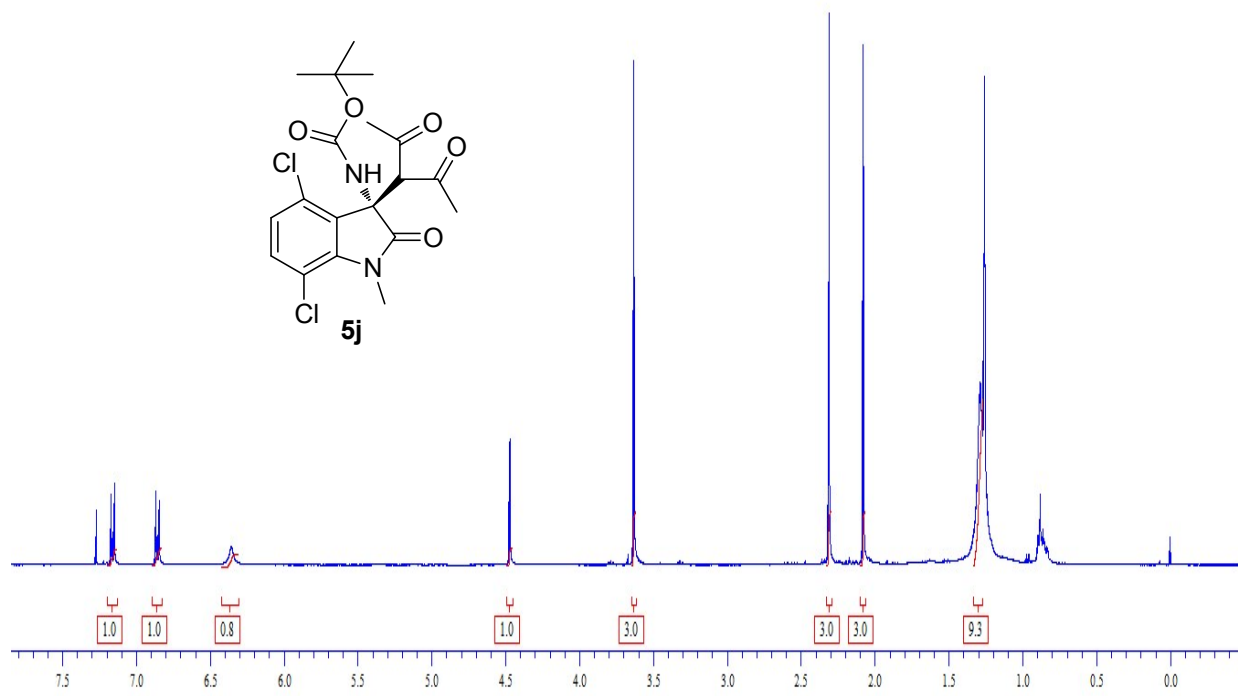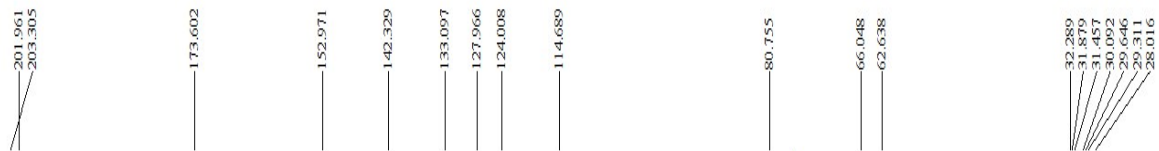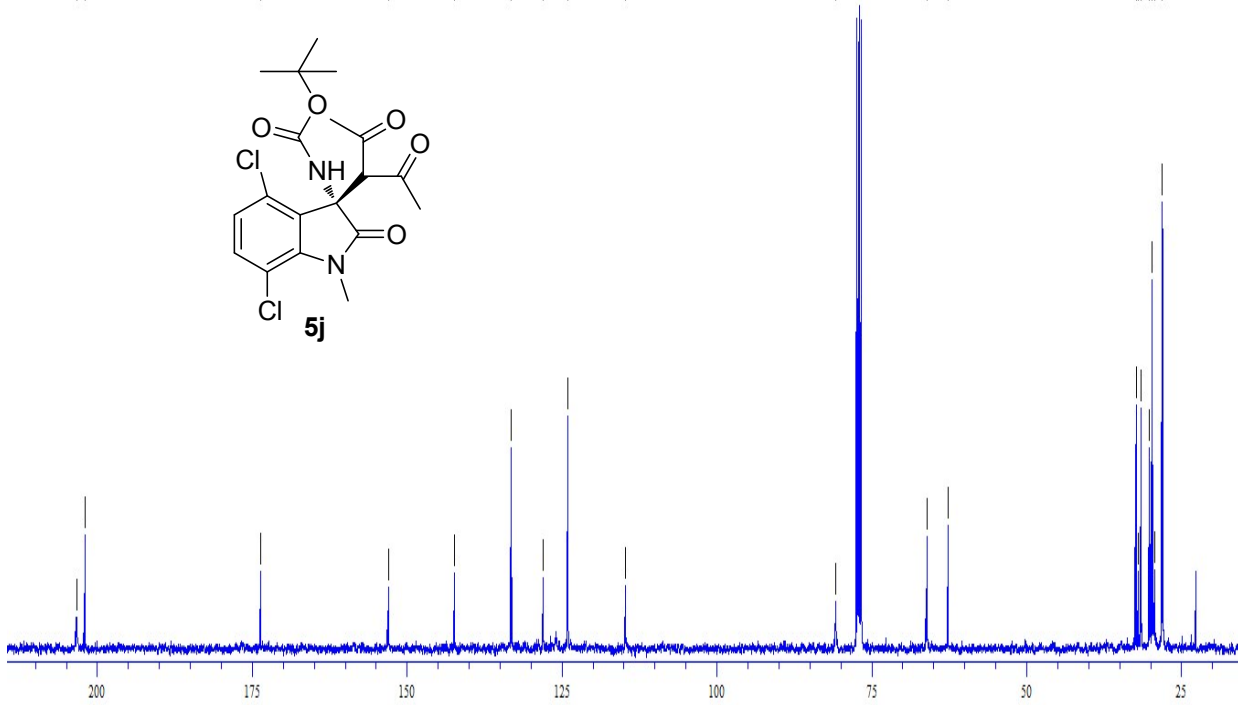



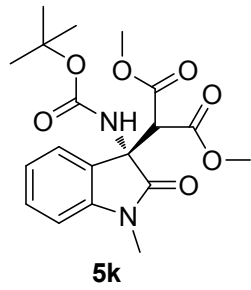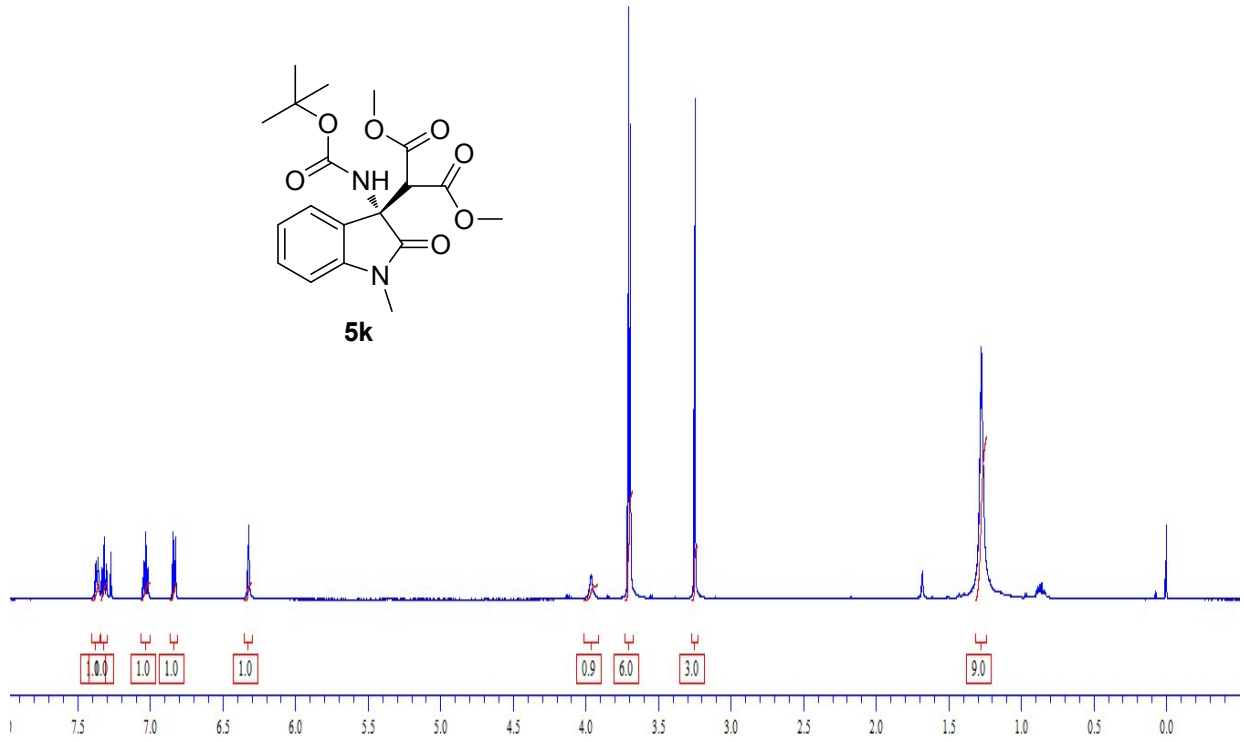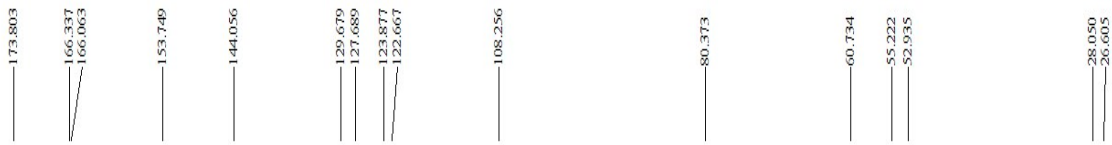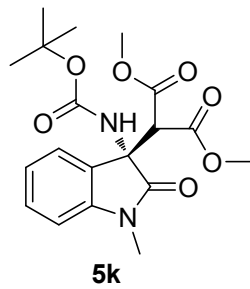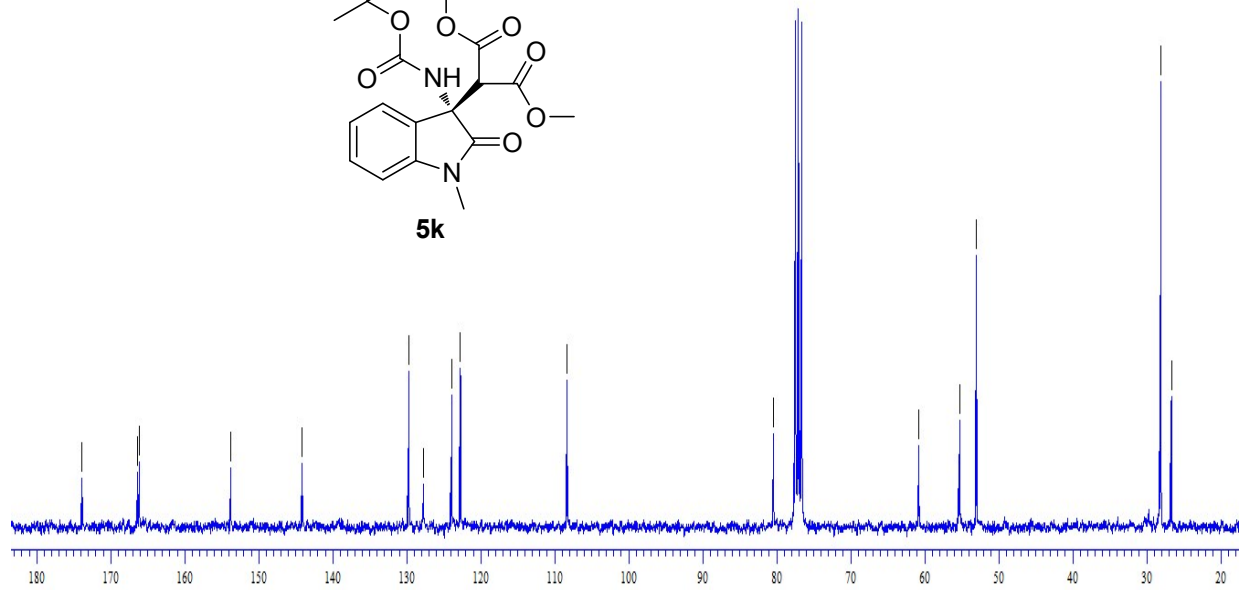

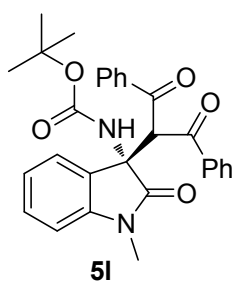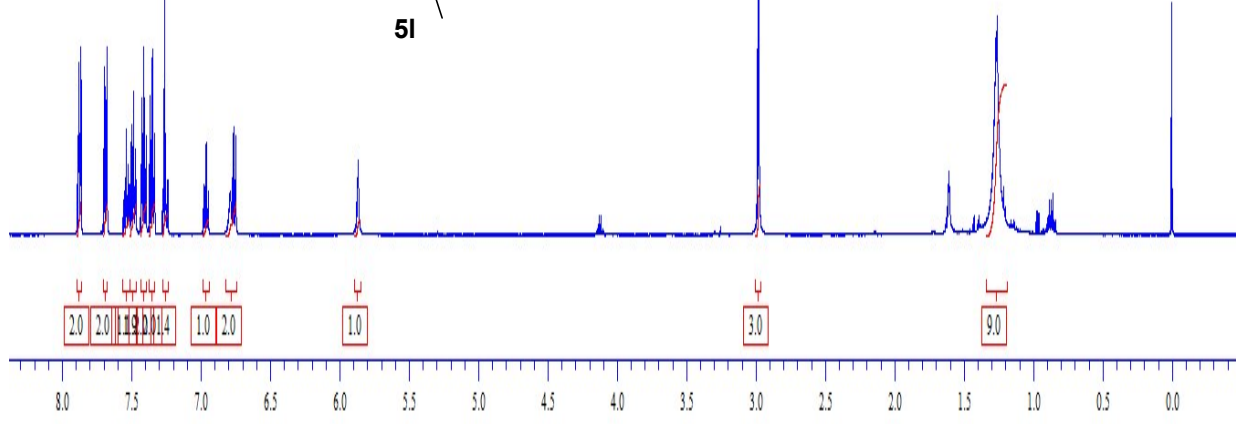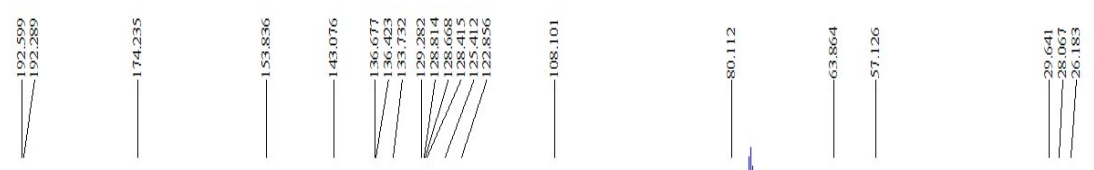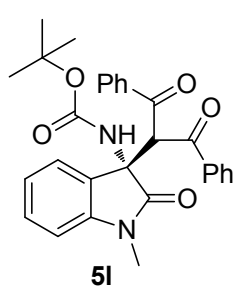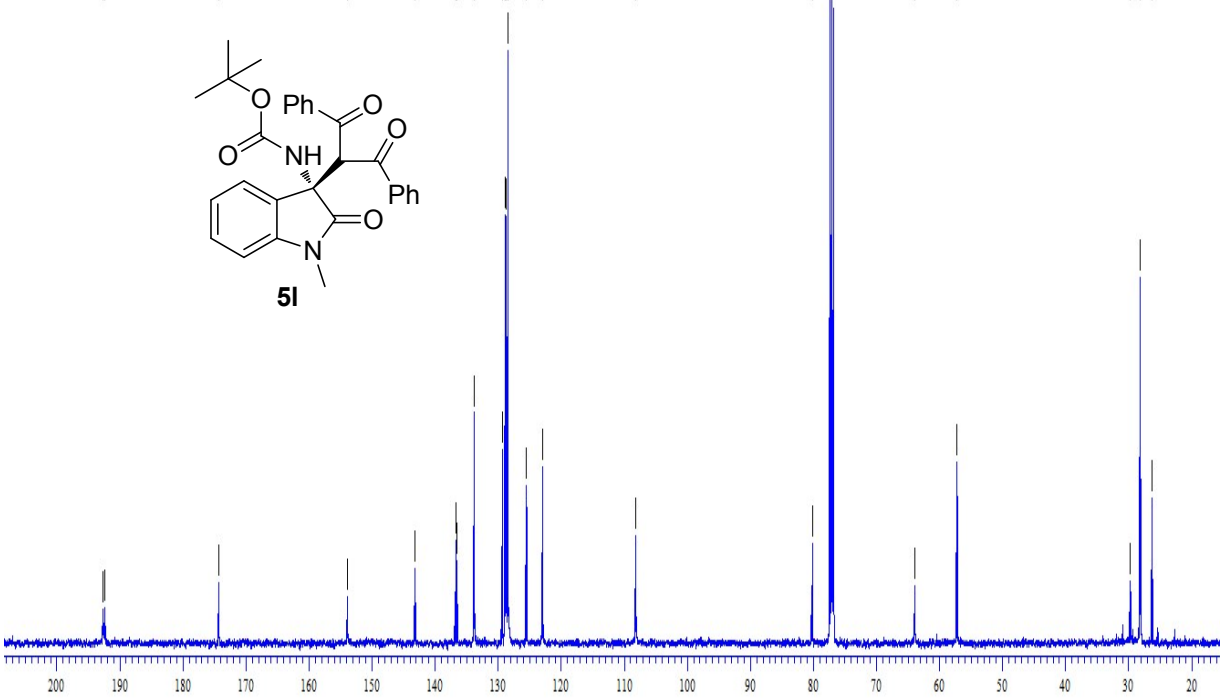

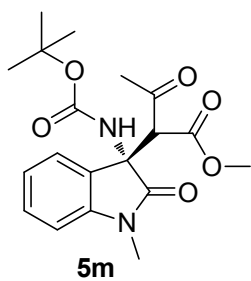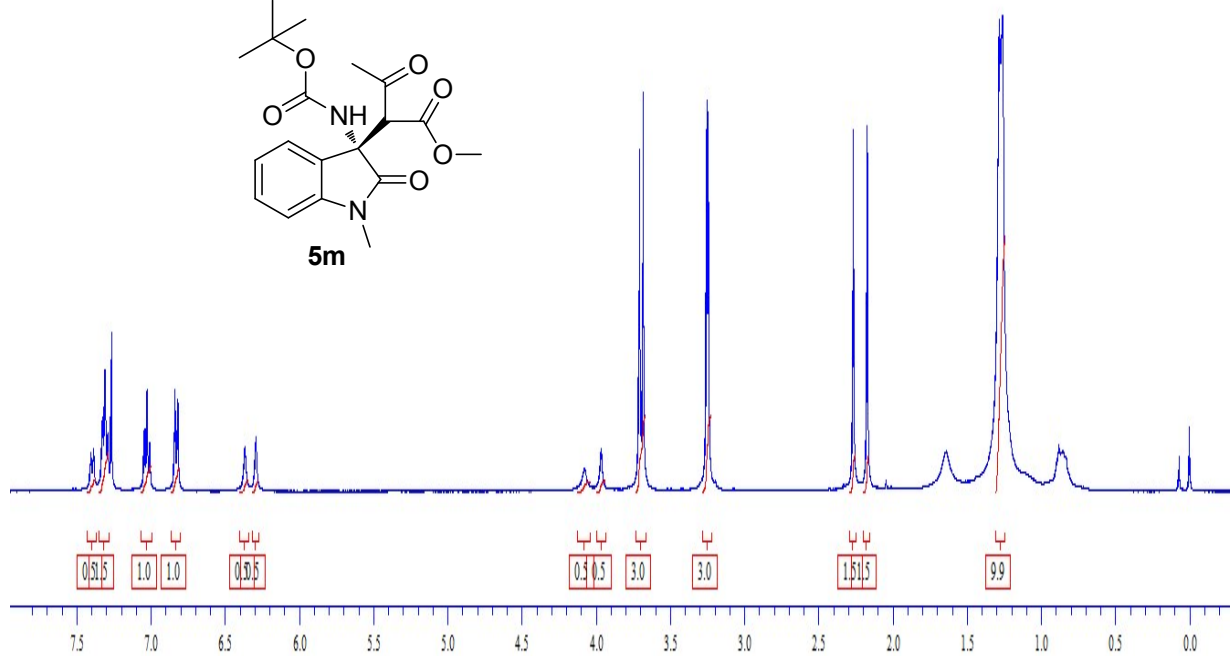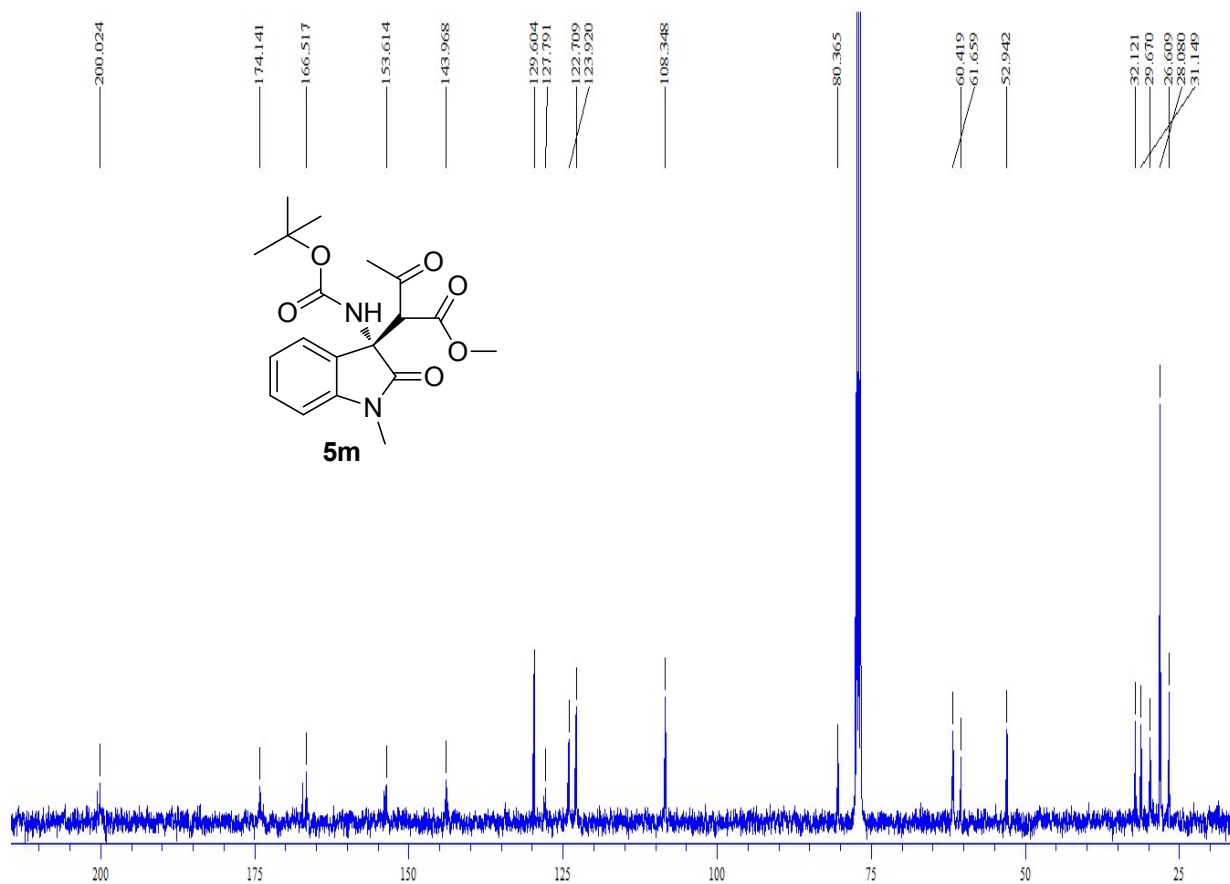

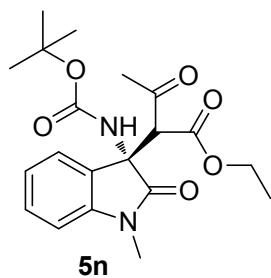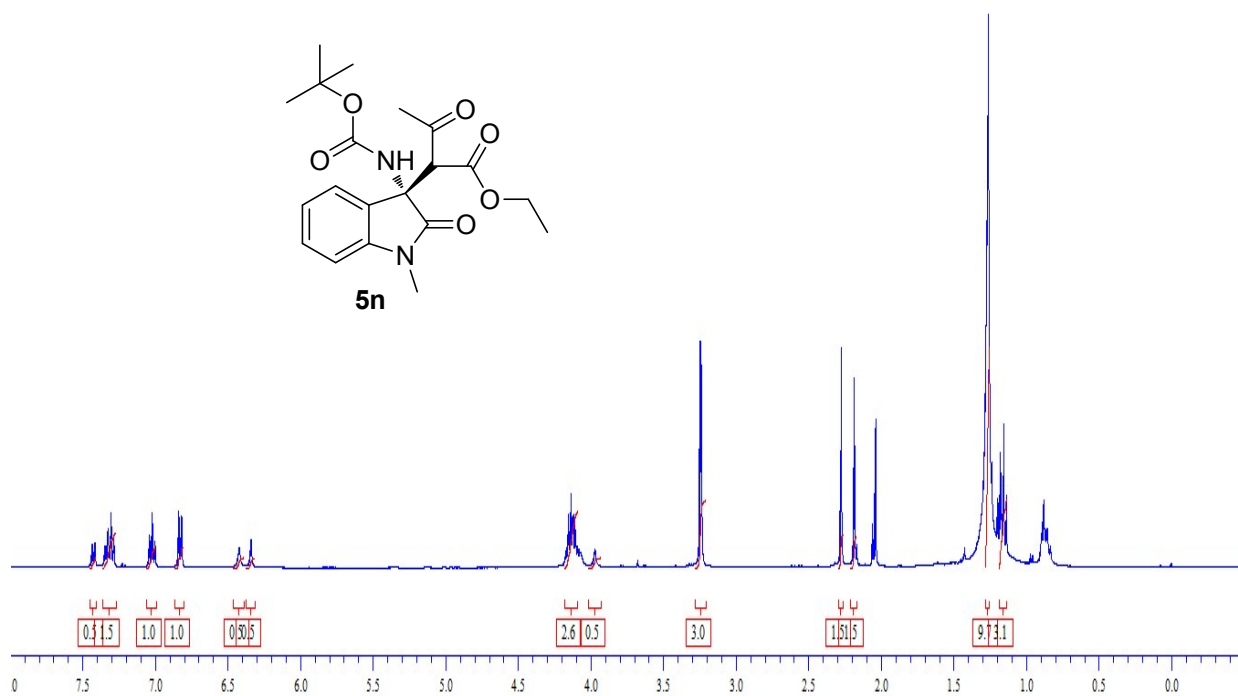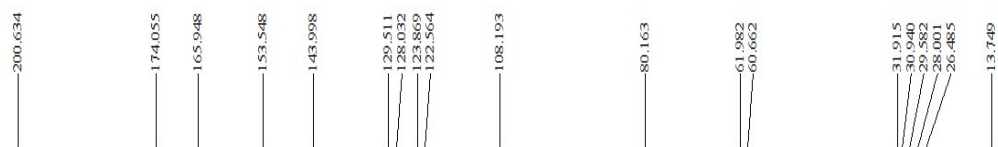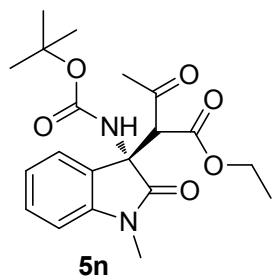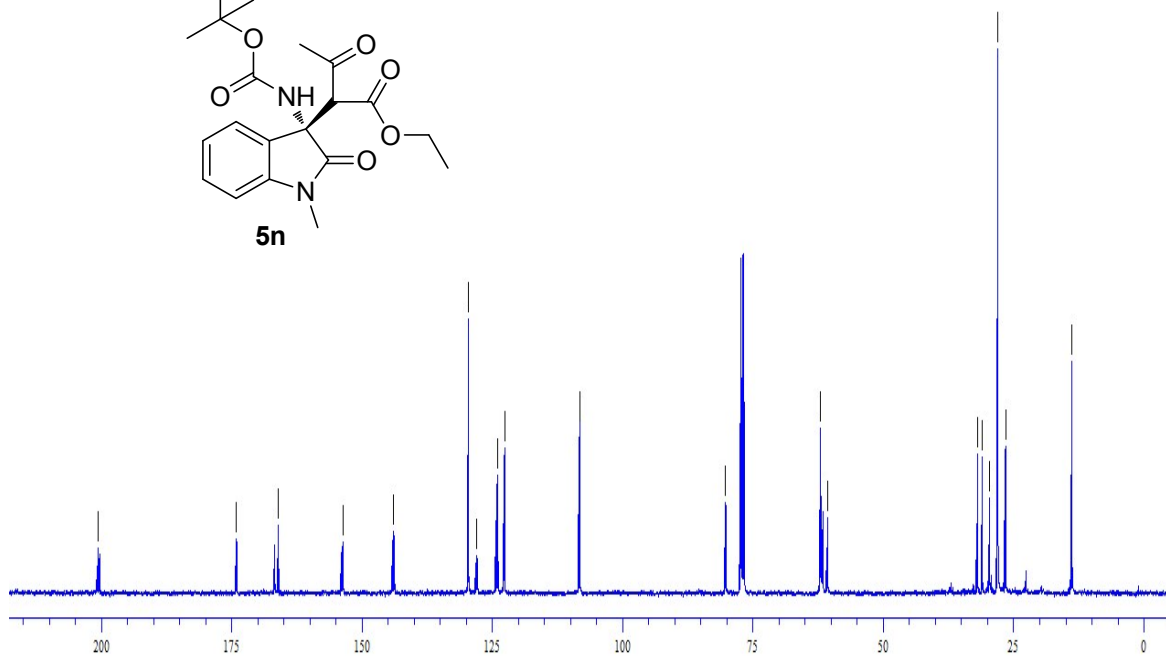

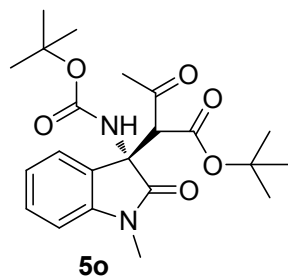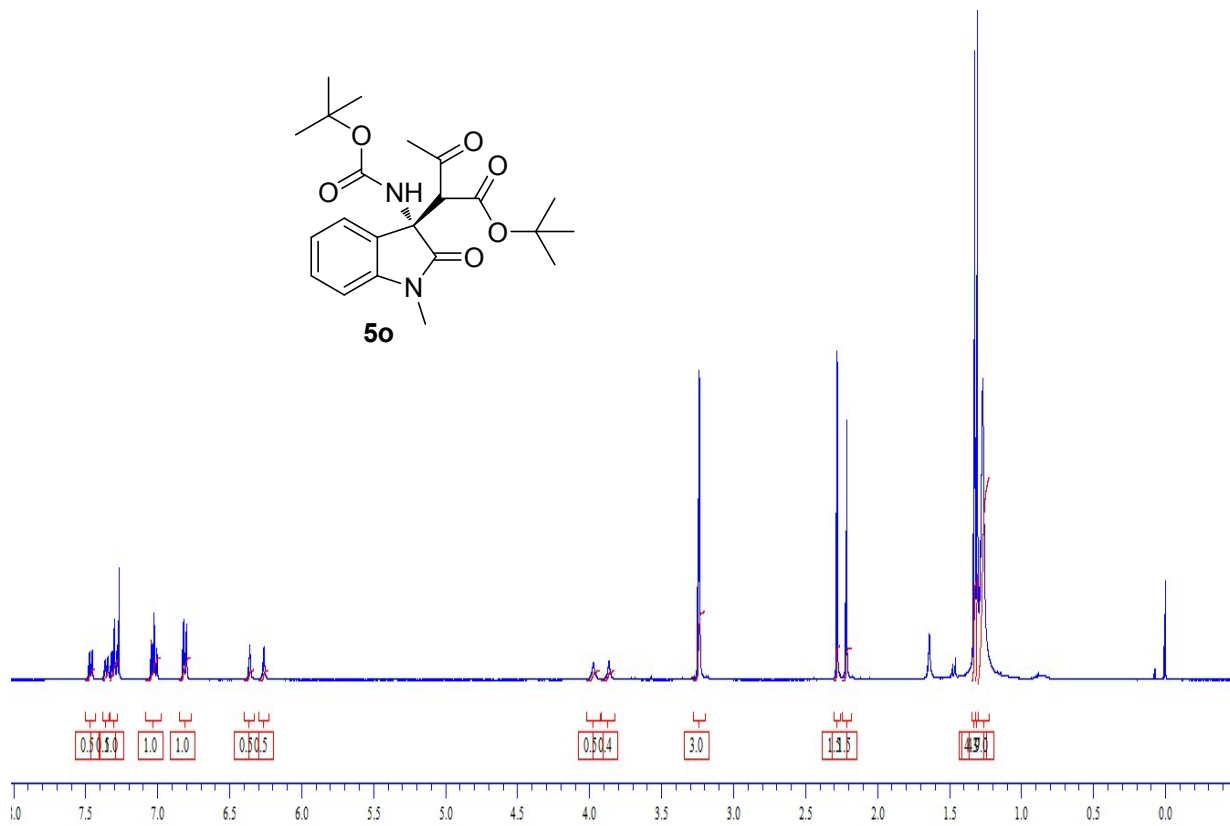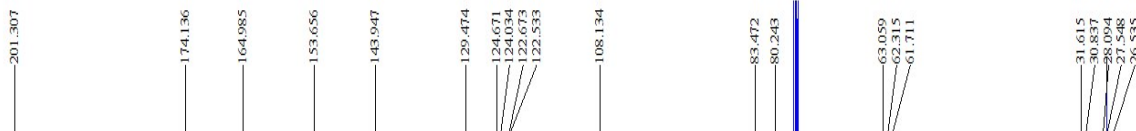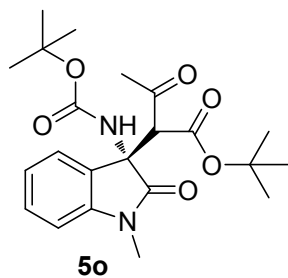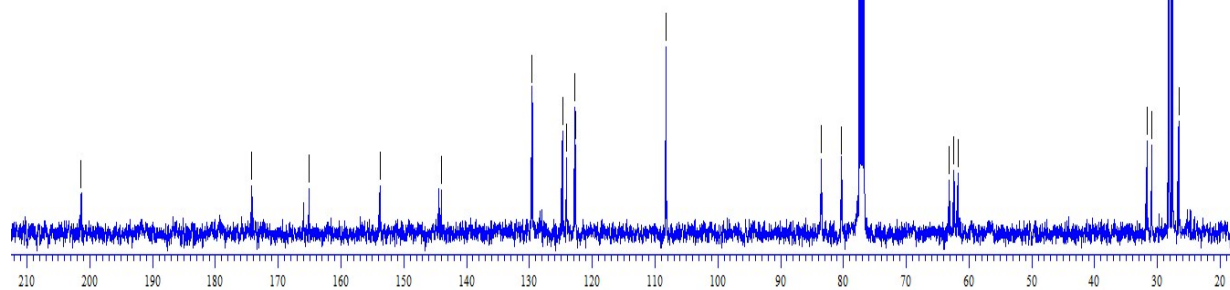

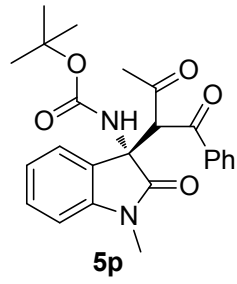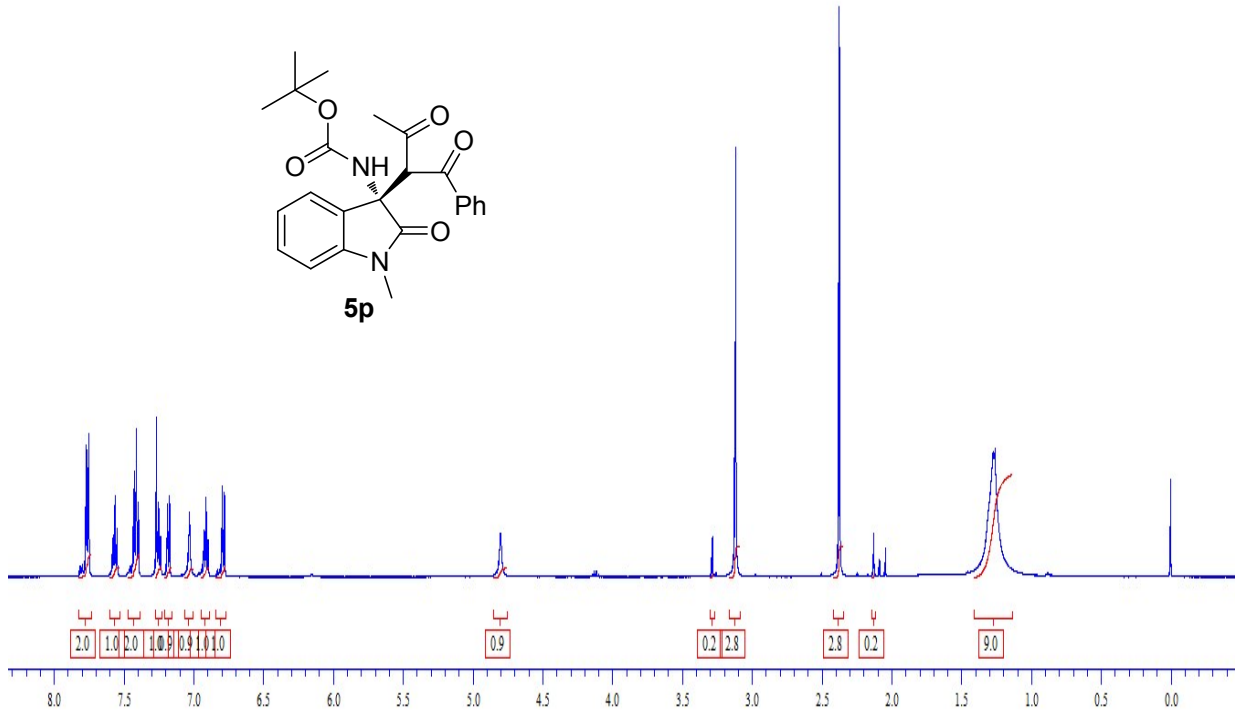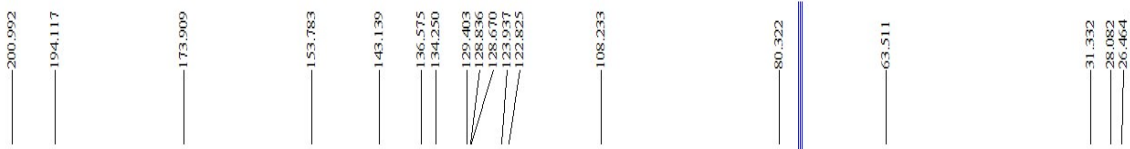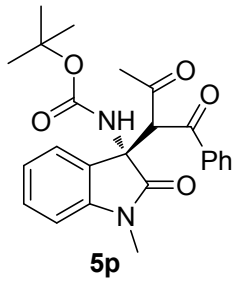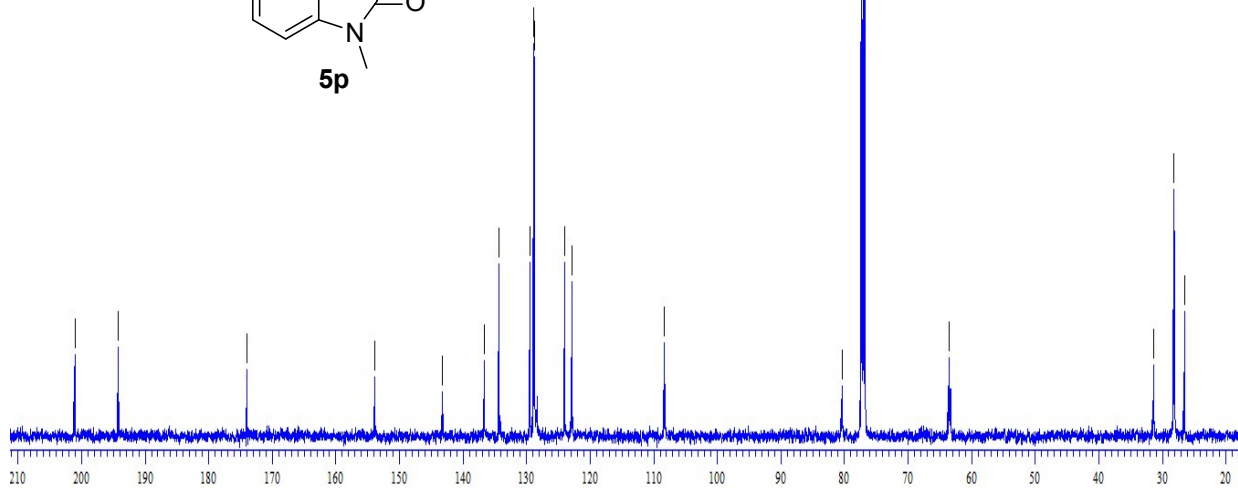

#### 4) HPLC spectra of product 4 and 5

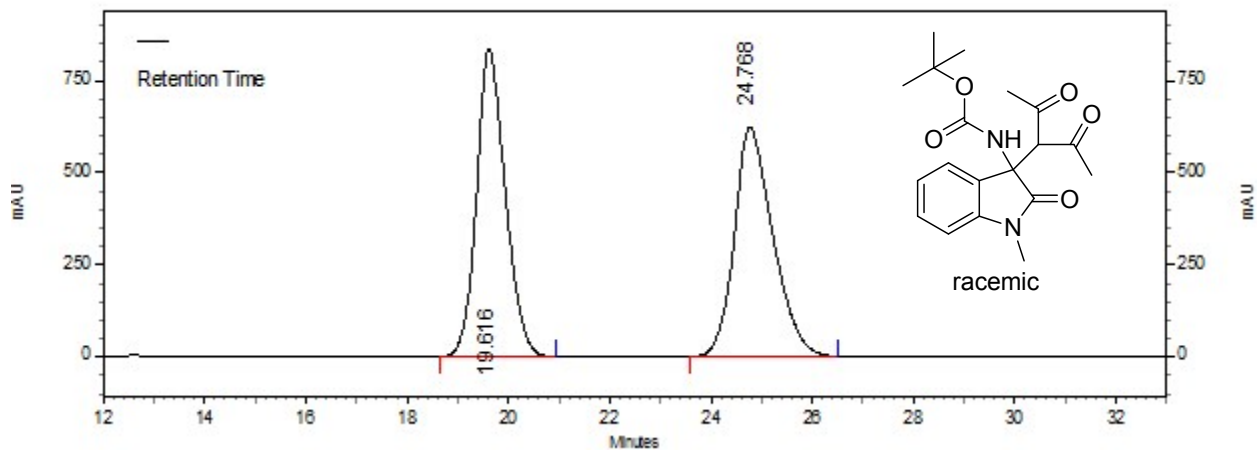

3: 254 nm, 8 nm

| Pk # | Retention Time | Area     | Area Percent | Height |
|------|----------------|----------|--------------|--------|
| 1    | 19.616         | 32979809 | 50.03        | 835411 |
| 2    | 24.768         | 32946595 | 49.97        | 621980 |

|        |  |          |        |         |
|--------|--|----------|--------|---------|
| Totals |  | 65926404 | 100.00 | 1457391 |
|--------|--|----------|--------|---------|

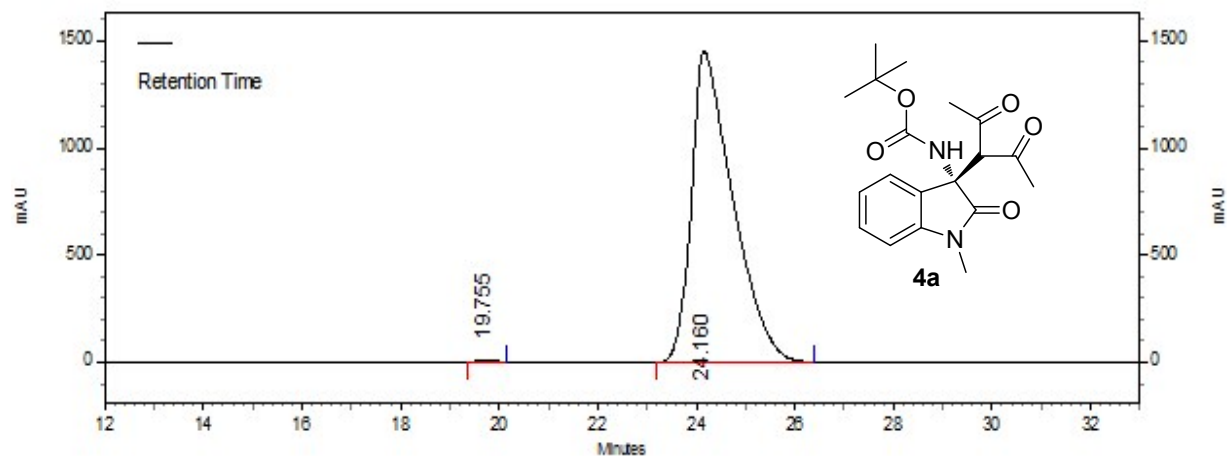

3: 254 nm, 8 nm

| Pk # | Retention Time | Area     | Area Percent | Height  |
|------|----------------|----------|--------------|---------|
| 1    | 19.755         | 202446   | 0.24         | 7518    |
| 2    | 24.160         | 84743334 | 99.76        | 1452775 |

|        |  |          |        |         |
|--------|--|----------|--------|---------|
| Totals |  | 84945780 | 100.00 | 1460293 |
|--------|--|----------|--------|---------|

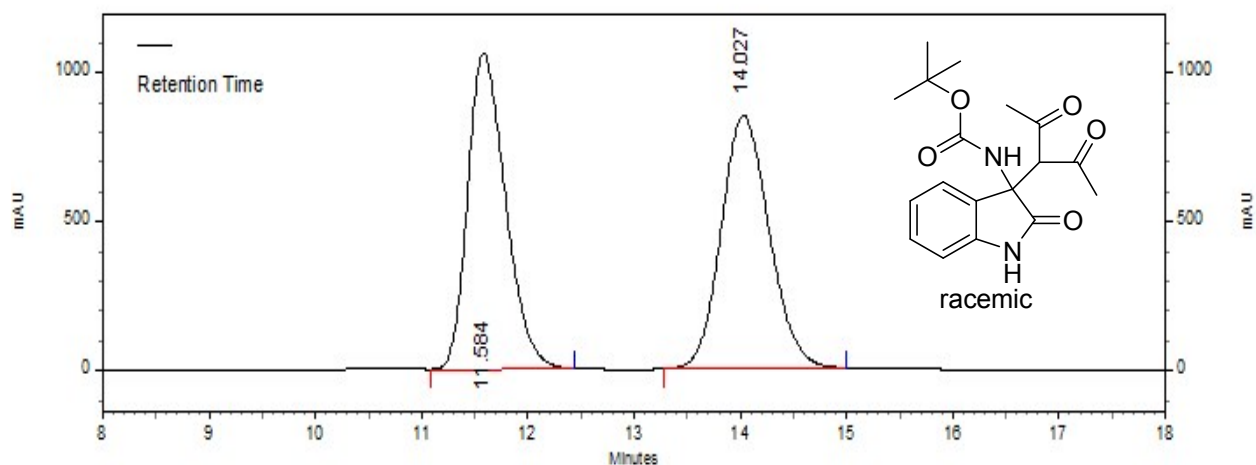

3: 254 nm, 8 nm

| Pk #   | Retention Time | Area     | Area Percent | Height  |
|--------|----------------|----------|--------------|---------|
| 1      | 11.584         | 26179125 | 49.54        | 1058311 |
| 2      | 14.027         | 26668310 | 50.46        | 847394  |
| Totals |                | 52847435 | 100.00       | 1905705 |

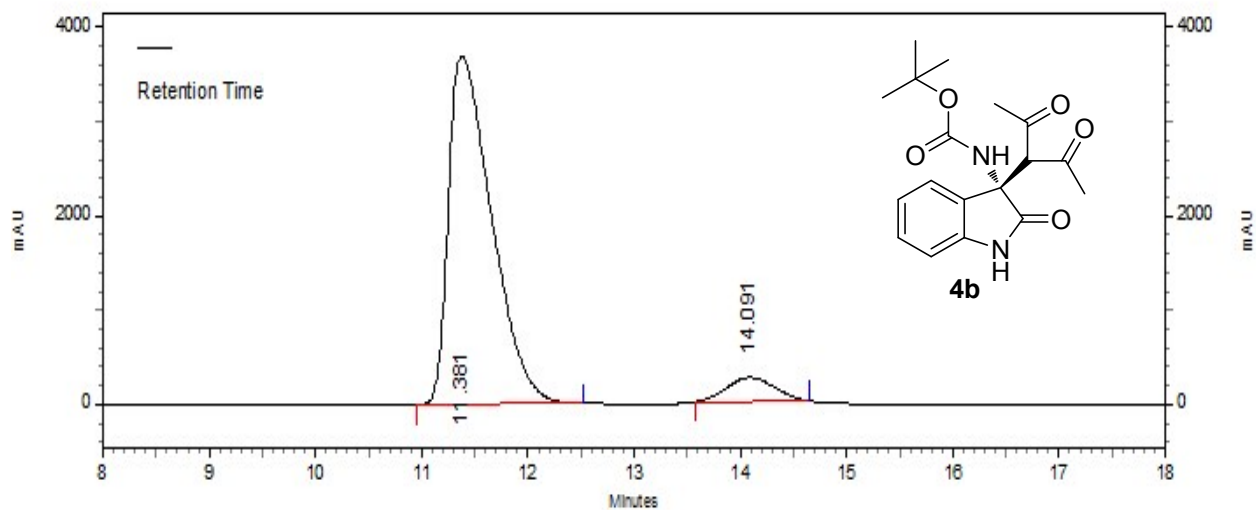

3: 254 nm, 8 nm

| Pk #   | Retention Time | Area      | Area Percent | Height  |
|--------|----------------|-----------|--------------|---------|
| 1      | 11.381         | 104133881 | 92.89        | 3687906 |
| 2      | 14.091         | 7969189   | 7.11         | 253536  |
| Totals |                | 112103070 | 100.00       | 3941442 |



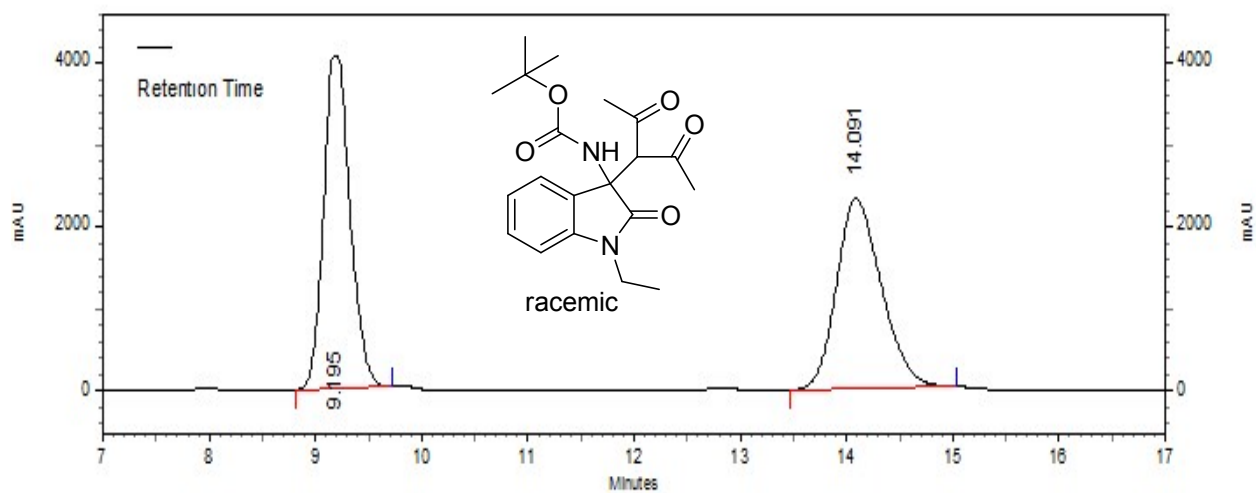

3: 254 nm, 8 nm

| Pk # | Retention Time | Area     | Area Percent | Height  |
|------|----------------|----------|--------------|---------|
| 1    | 9.195          | 70559858 | 50.87        | 4059689 |
| 2    | 14.091         | 68133701 | 49.13        | 2323158 |

|        |  |           |        |         |
|--------|--|-----------|--------|---------|
| Totals |  | 138693559 | 100.00 | 6382847 |
|--------|--|-----------|--------|---------|

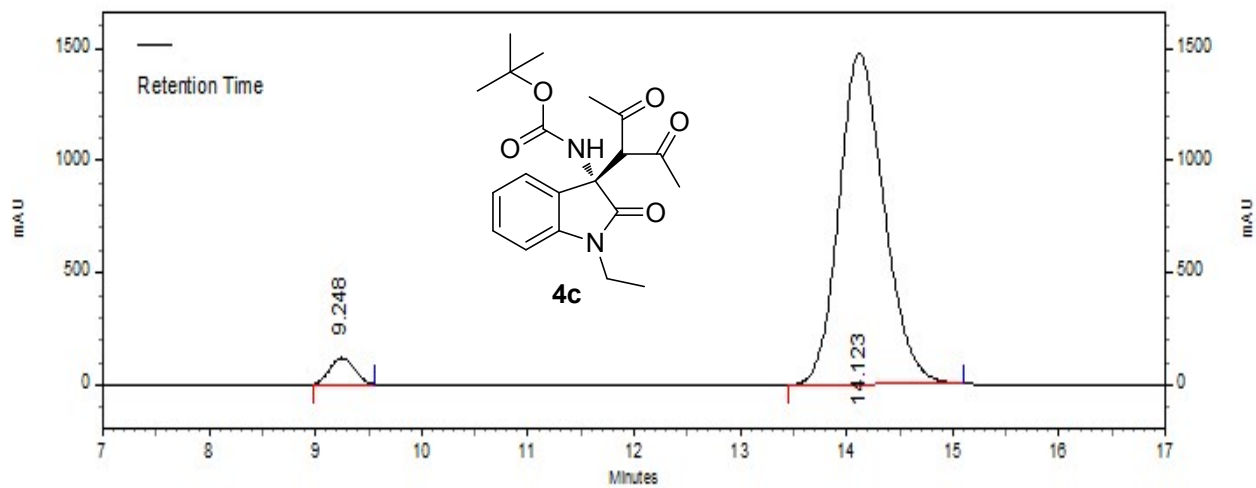

3: 254 nm, 8 nm

| Pk # | Retention Time | Area     | Area Percent | Height  |
|------|----------------|----------|--------------|---------|
| 1    | 9.248          | 1887166  | 4.15         | 116785  |
| 2    | 14.123         | 43626059 | 95.85        | 1476354 |

|        |  |          |        |         |
|--------|--|----------|--------|---------|
| Totals |  | 45513225 | 100.00 | 1593139 |
|--------|--|----------|--------|---------|

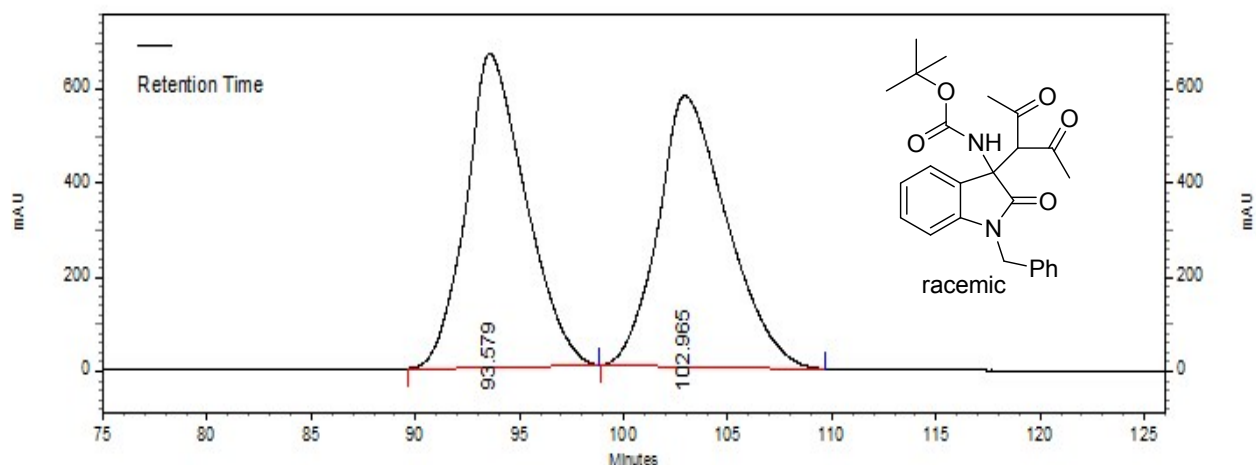

1: 210 nm, 8 nm

| Pk # | Retention Time | Area      | Area Percent | Height |
|------|----------------|-----------|--------------|--------|
| 1    | 93.579         | 132342715 | 49.90        | 666735 |
| 2    | 102.965        | 132888471 | 50.10        | 576540 |

|        |  |           |        |         |
|--------|--|-----------|--------|---------|
| Totals |  | 265231186 | 100.00 | 1243275 |
|--------|--|-----------|--------|---------|

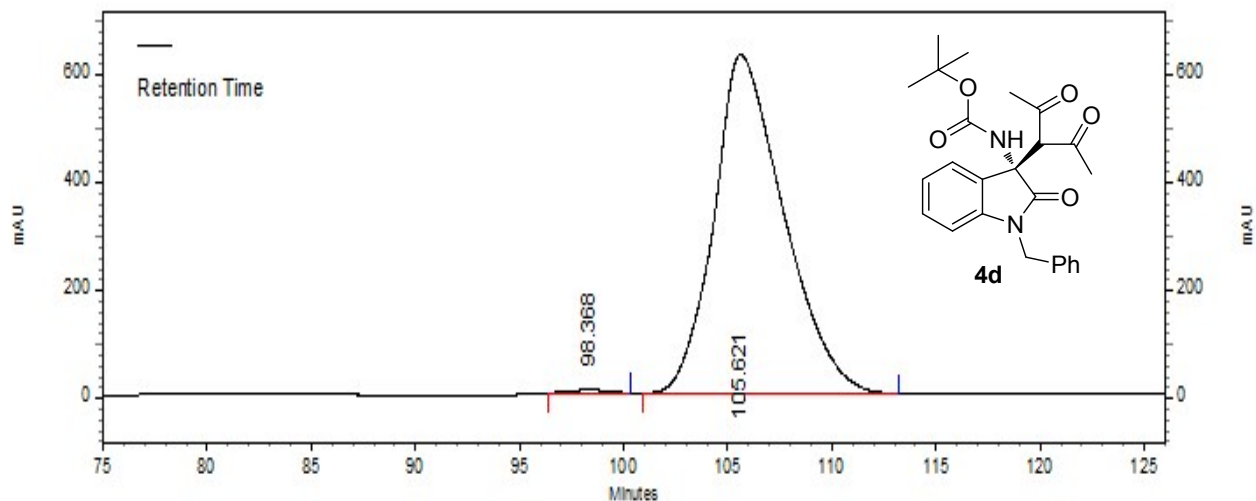

1: 210 nm, 8 nm

| Pk # | Retention Time | Area      | Area Percent | Height |
|------|----------------|-----------|--------------|--------|
| 1    | 98.368         | 798969    | 0.54         | 6056   |
| 2    | 105.621        | 147033369 | 99.46        | 629449 |

|        |  |           |        |        |
|--------|--|-----------|--------|--------|
| Totals |  | 147832338 | 100.00 | 635505 |
|--------|--|-----------|--------|--------|

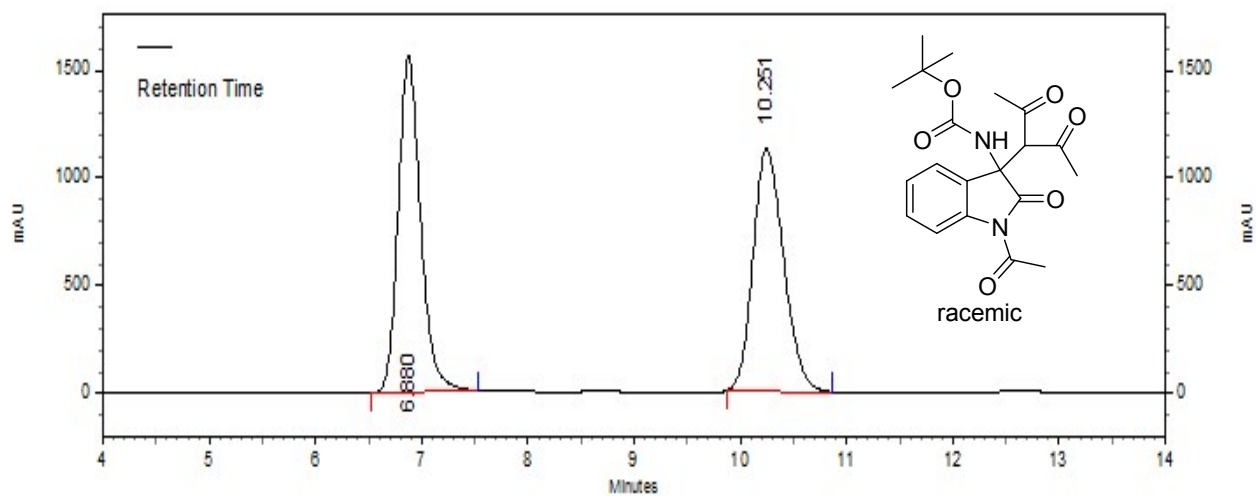

4: 225 nm, 8 nm

| Pk # | Retention Time | Area     | Area Percent | Height  |
|------|----------------|----------|--------------|---------|
| 1    | 6.880          | 22853715 | 50.37        | 1561106 |
| 2    | 10.251         | 22520855 | 49.63        | 1128095 |

|        |  |          |        |         |
|--------|--|----------|--------|---------|
| Totals |  | 45374570 | 100.00 | 2689201 |
|--------|--|----------|--------|---------|

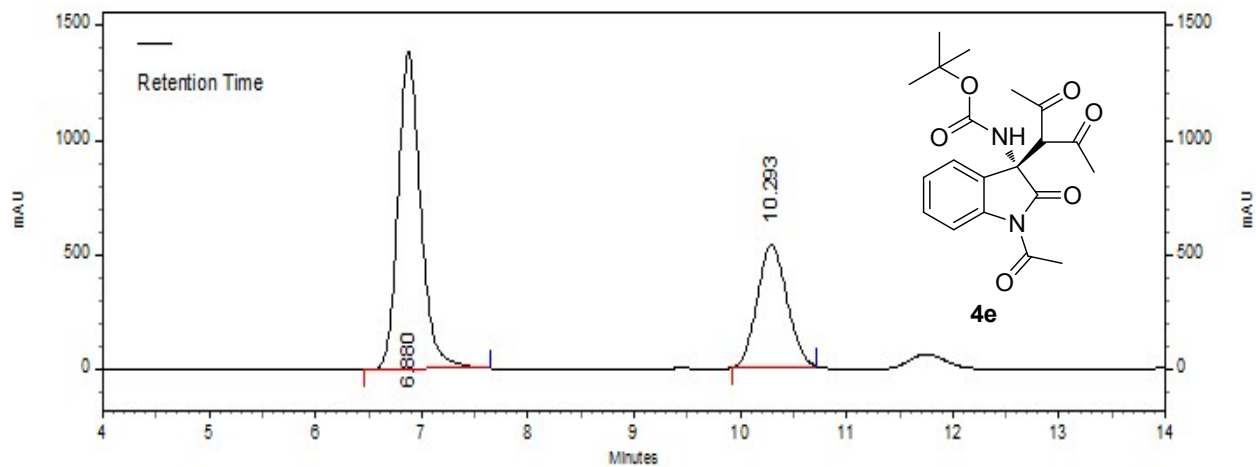

4: 225 nm, 8 nm

| Pk # | Retention Time | Area     | Area Percent | Height  |
|------|----------------|----------|--------------|---------|
| 1    | 6.880          | 20574875 | 66.45        | 1384126 |
| 2    | 10.293         | 10386913 | 33.55        | 532709  |

|        |  |          |        |         |
|--------|--|----------|--------|---------|
| Totals |  | 30961788 | 100.00 | 1916835 |
|--------|--|----------|--------|---------|

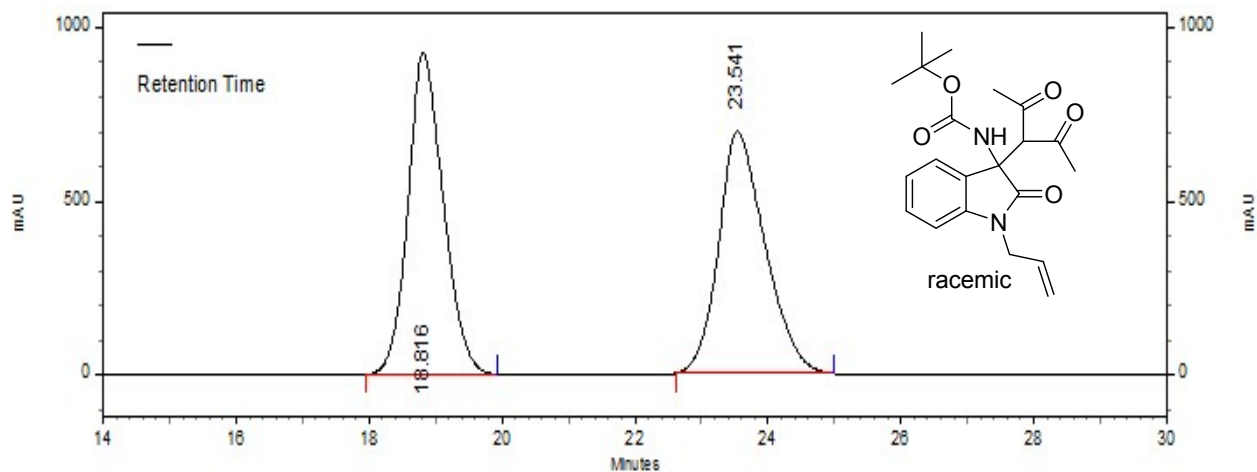

3: 254 nm, 8 nm

| Pk # | Retention Time | Area     | Area Percent | Height |
|------|----------------|----------|--------------|--------|
| 1    | 18.816         | 34145838 | 50.21        | 925578 |
| 2    | 23.541         | 33856953 | 49.79        | 695877 |

|        |  |          |        |         |
|--------|--|----------|--------|---------|
| Totals |  | 68002791 | 100.00 | 1621455 |
|--------|--|----------|--------|---------|

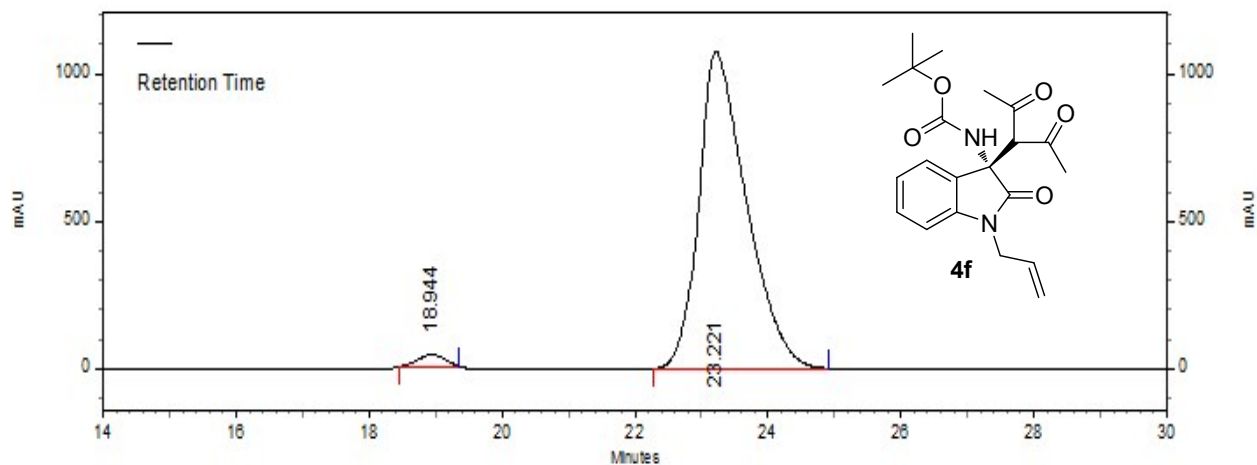

3: 254 nm, 8 nm

| Pk # | Retention Time | Area     | Area Percent | Height  |
|------|----------------|----------|--------------|---------|
| 1    | 18.944         | 1167691  | 2.13         | 40618   |
| 2    | 23.221         | 53717087 | 97.87        | 1074548 |

|        |  |          |        |         |
|--------|--|----------|--------|---------|
| Totals |  | 54884778 | 100.00 | 1115166 |
|--------|--|----------|--------|---------|

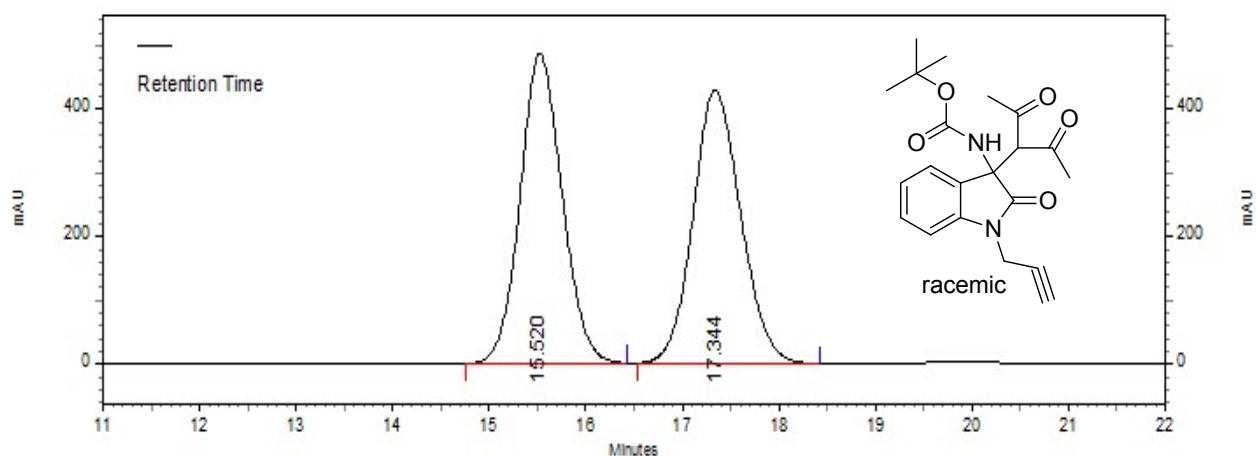

3: 254 nm, 8 nm

| Pk # | Retention Time | Area     | Area Percent | Height |
|------|----------------|----------|--------------|--------|
| 1    | 15.520         | 14757940 | 50.11        | 486169 |
| 2    | 17.344         | 14695668 | 49.89        | 427721 |

|        |  |          |        |        |
|--------|--|----------|--------|--------|
| Totals |  | 29453608 | 100.00 | 913890 |
|--------|--|----------|--------|--------|

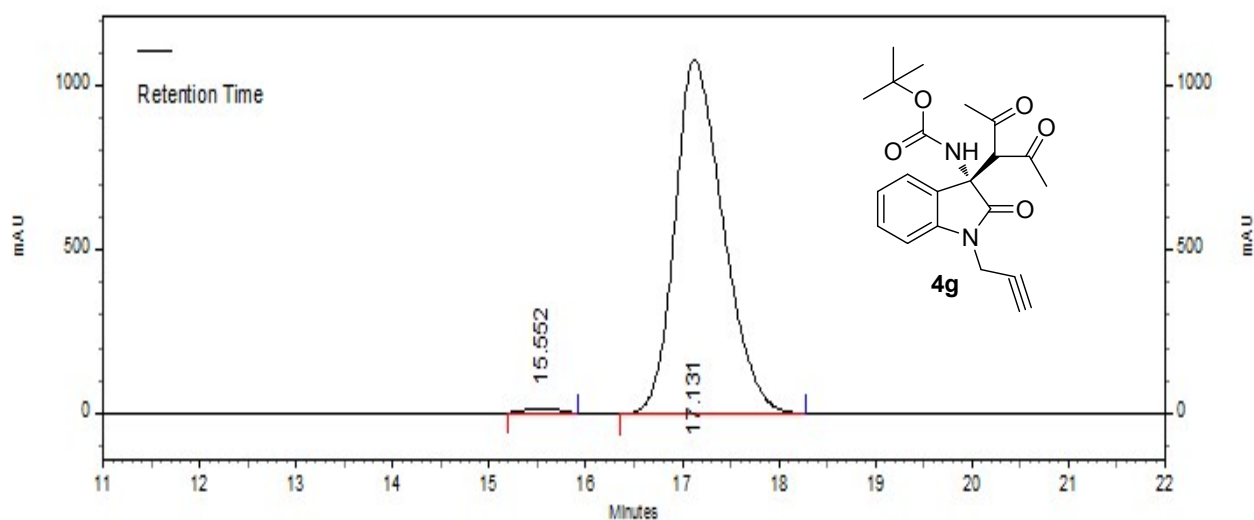

3: 254 nm, 8 nm

| Pk # | Retention Time | Area     | Area Percent | Height  |
|------|----------------|----------|--------------|---------|
| 1    | 15.552         | 376004   | 0.99         | 15792   |
| 2    | 17.131         | 37524484 | 99.01        | 1078000 |

|        |  |          |        |         |
|--------|--|----------|--------|---------|
| Totals |  | 37900488 | 100.00 | 1093792 |
|--------|--|----------|--------|---------|

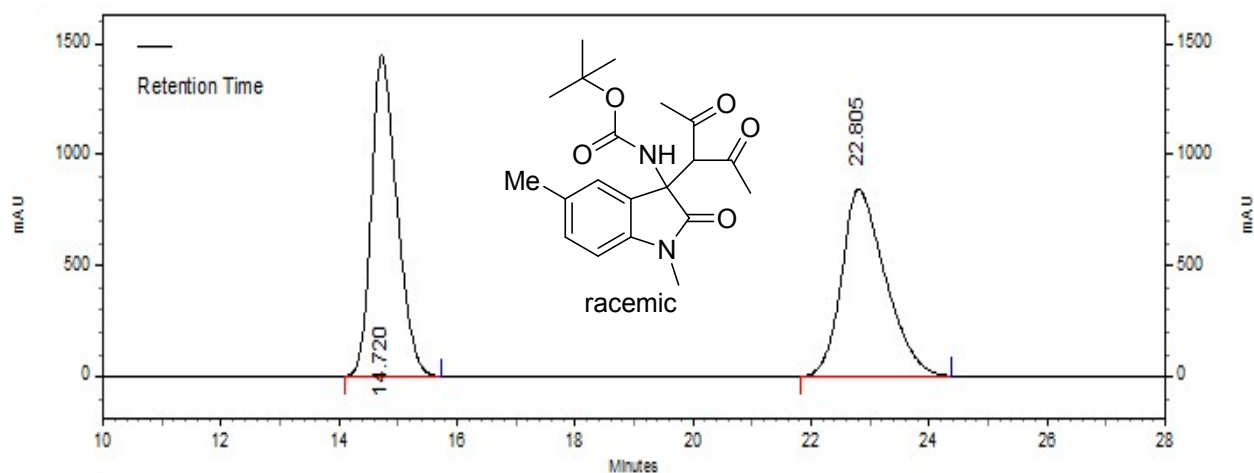

3: 254 nm, 8 nm

| Pk # | Retention Time | Area     | Area Percent | Height  |
|------|----------------|----------|--------------|---------|
| 1    | 14.720         | 43557630 | 50.06        | 1447991 |
| 2    | 22.805         | 43461005 | 49.94        | 843954  |

|        |  |          |        |         |
|--------|--|----------|--------|---------|
| Totals |  | 87018635 | 100.00 | 2291945 |
|--------|--|----------|--------|---------|

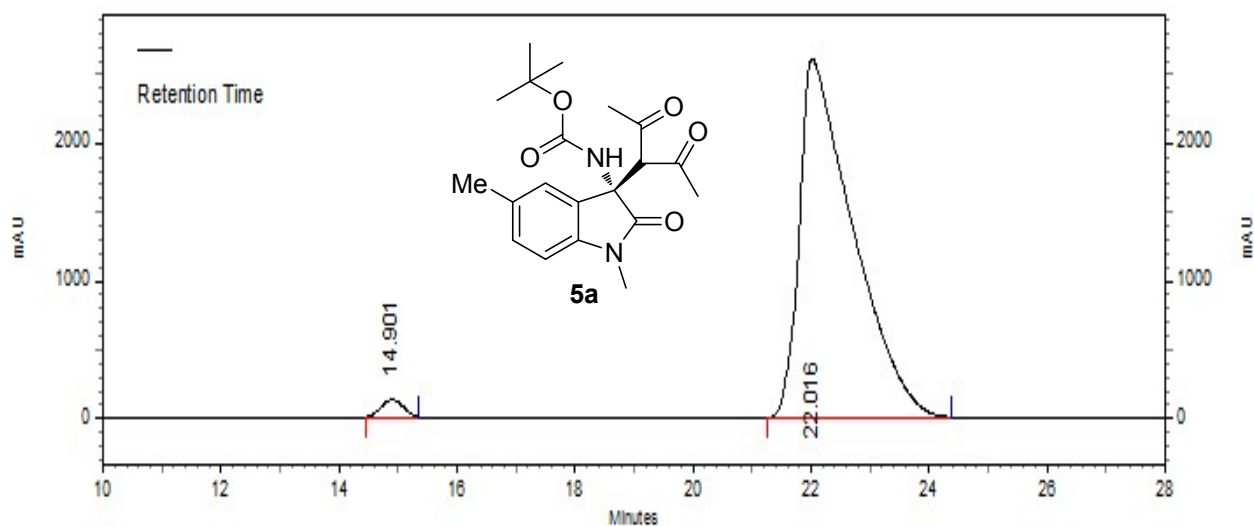

3: 254 nm, 8 nm

| Pk # | Retention Time | Area      | Area Percent | Height  |
|------|----------------|-----------|--------------|---------|
| 1    | 14.901         | 3251926   | 1.94         | 125660  |
| 2    | 22.016         | 164629718 | 98.06        | 2604545 |

|        |  |           |        |         |
|--------|--|-----------|--------|---------|
| Totals |  | 167881644 | 100.00 | 2730205 |
|--------|--|-----------|--------|---------|

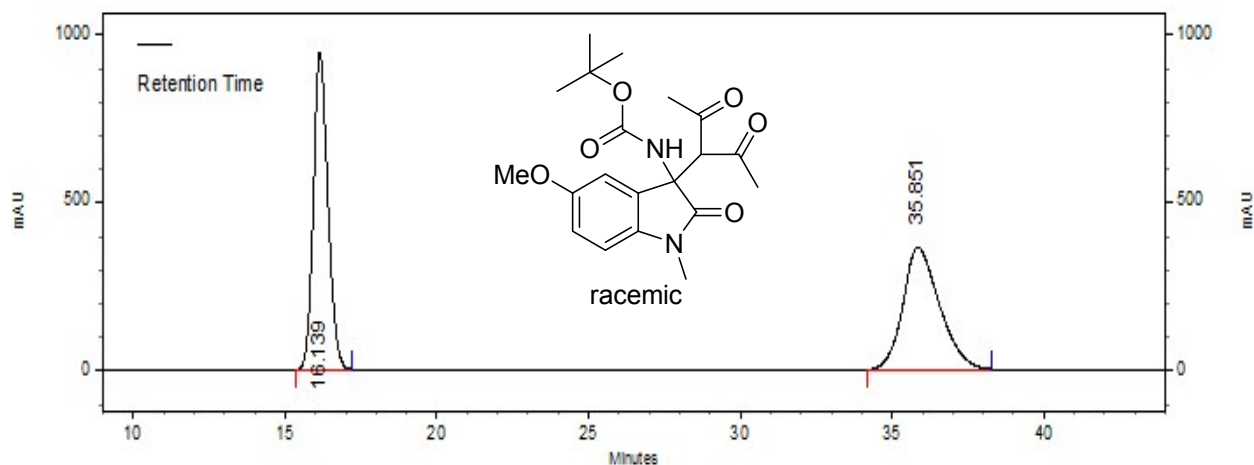

3: 254 nm, 8 nm

| Pk # | Retention Time | Area     | Area Percent | Height |
|------|----------------|----------|--------------|--------|
| 1    | 16.139         | 31446637 | 50.59        | 944672 |
| 2    | 35.851         | 30719192 | 49.41        | 365804 |

|        |  |          |        |         |
|--------|--|----------|--------|---------|
| Totals |  | 62165829 | 100.00 | 1310476 |
|--------|--|----------|--------|---------|

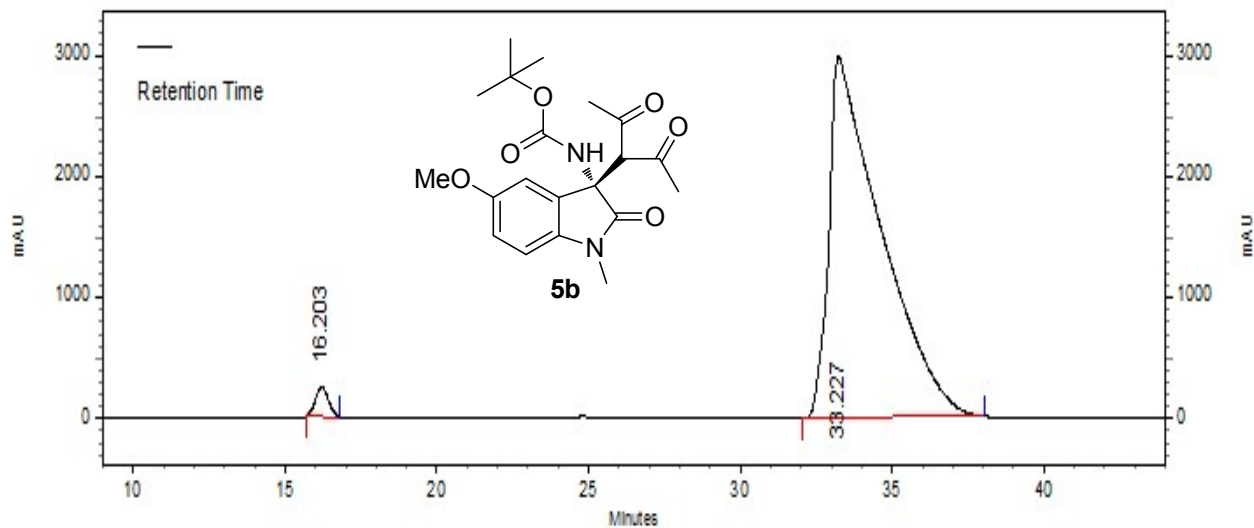

3: 254 nm, 8 nm

| Pk # | Retention Time | Area      | Area Percent | Height  |
|------|----------------|-----------|--------------|---------|
| 1    | 16.203         | 7289824   | 1.99         | 242188  |
| 2    | 33.227         | 359356069 | 98.01        | 2997645 |

|        |  |           |        |         |
|--------|--|-----------|--------|---------|
| Totals |  | 366645893 | 100.00 | 3239833 |
|--------|--|-----------|--------|---------|

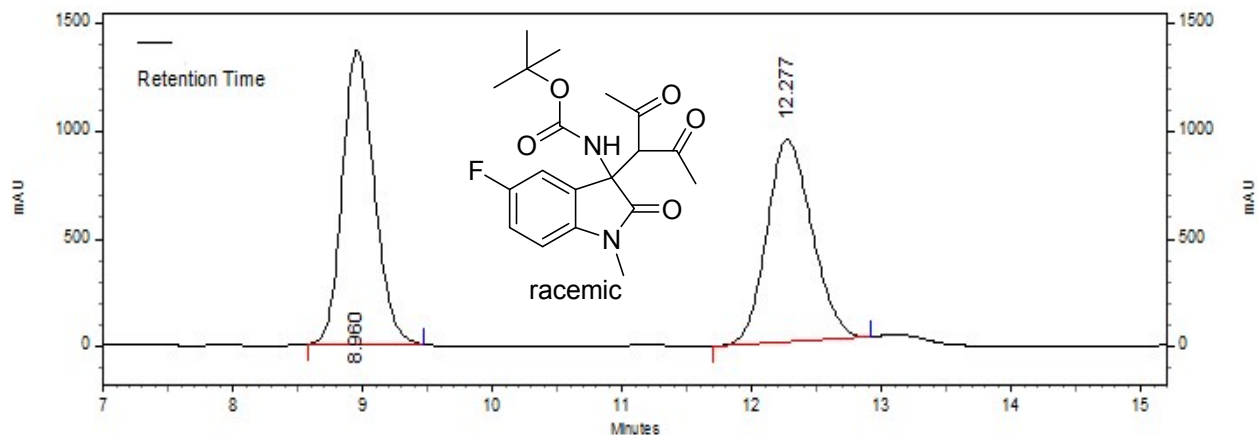

3: 254 nm, 8 nm

| Pk # | Retention Time | Area     | Area Percent | Height  |
|------|----------------|----------|--------------|---------|
| 1    | 8.960          | 23246556 | 50.72        | 1364831 |
| 2    | 12.277         | 22587951 | 49.28        | 937886  |

|        |  |          |        |         |
|--------|--|----------|--------|---------|
| Totals |  | 45834507 | 100.00 | 2302717 |
|--------|--|----------|--------|---------|

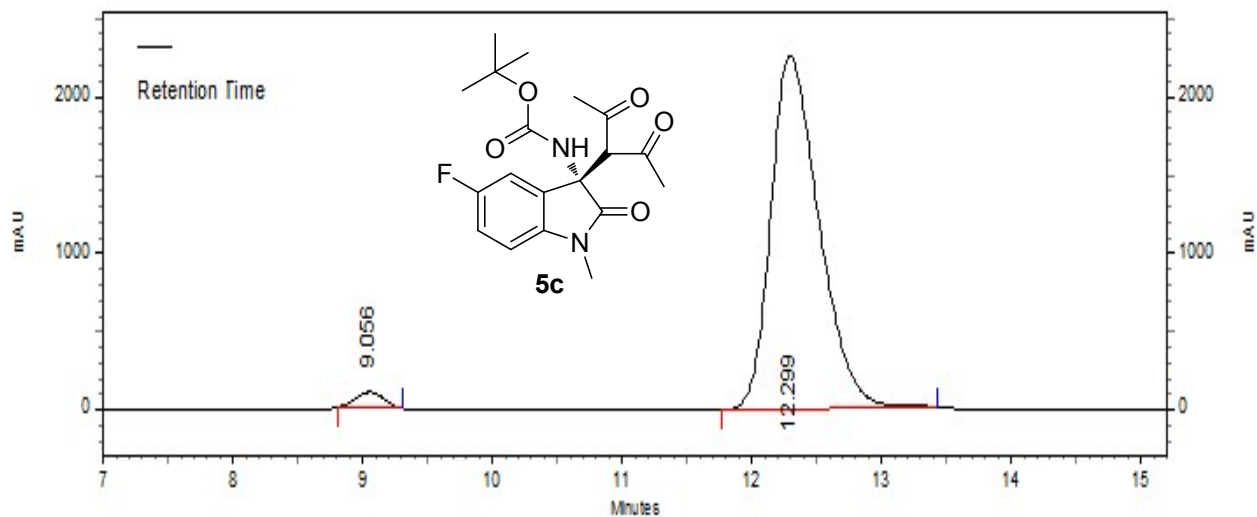

3: 254 nm, 8 nm

| Pk # | Retention Time | Area     | Area Percent | Height  |
|------|----------------|----------|--------------|---------|
| 1    | 9.056          | 1495242  | 2.50         | 99176   |
| 2    | 12.299         | 58219469 | 97.50        | 2253746 |

|        |  |          |        |         |
|--------|--|----------|--------|---------|
| Totals |  | 59714711 | 100.00 | 2352922 |
|--------|--|----------|--------|---------|



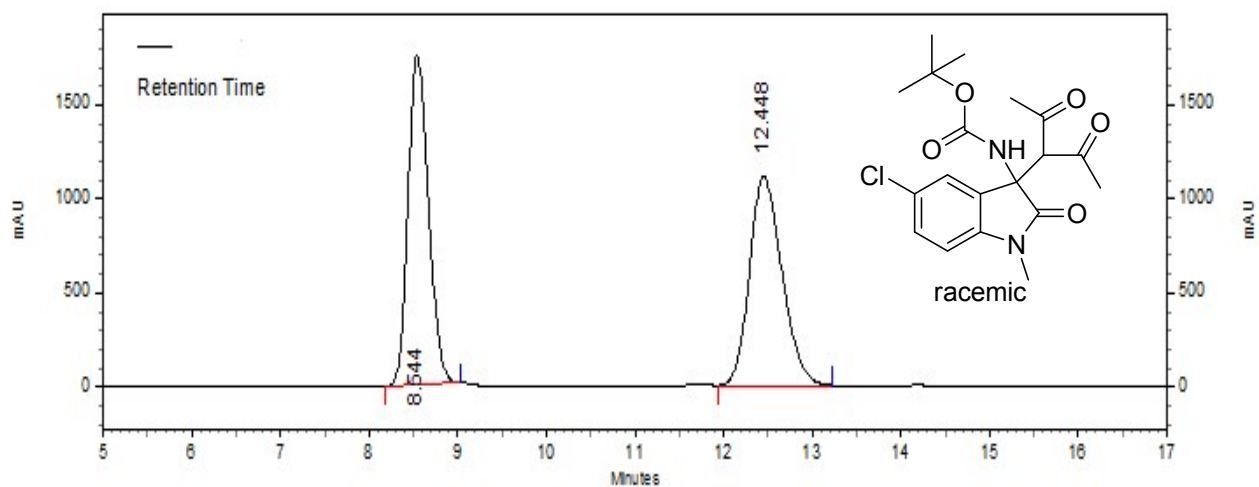

2: 230 nm, 8 nm

| Pk # | Retention Time | Area     | Area Percent | Height  |
|------|----------------|----------|--------------|---------|
| 1    | 8.544          | 28021404 | 49.66        | 1753908 |
| 2    | 12.448         | 28408220 | 50.34        | 1115255 |

|        |  |          |        |         |
|--------|--|----------|--------|---------|
| Totals |  | 56429624 | 100.00 | 2869163 |
|--------|--|----------|--------|---------|

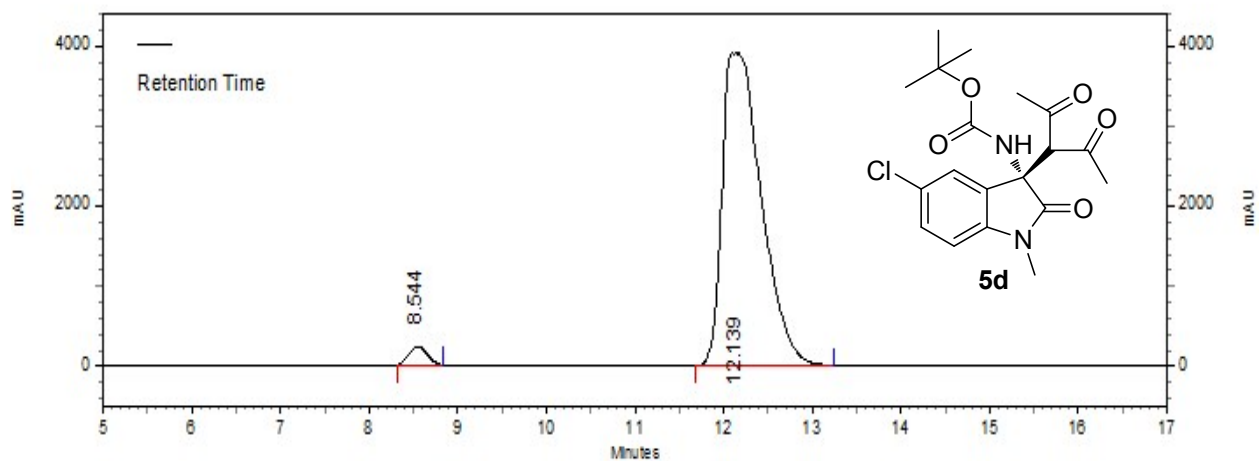

2: 230 nm, 8 nm

| Pk # | Retention Time | Area      | Area Percent | Height  |
|------|----------------|-----------|--------------|---------|
| 1    | 8.544          | 3332382   | 2.70         | 229771  |
| 2    | 12.139         | 120293919 | 97.30        | 3923303 |

|        |  |           |        |         |
|--------|--|-----------|--------|---------|
| Totals |  | 123626301 | 100.00 | 4153074 |
|--------|--|-----------|--------|---------|

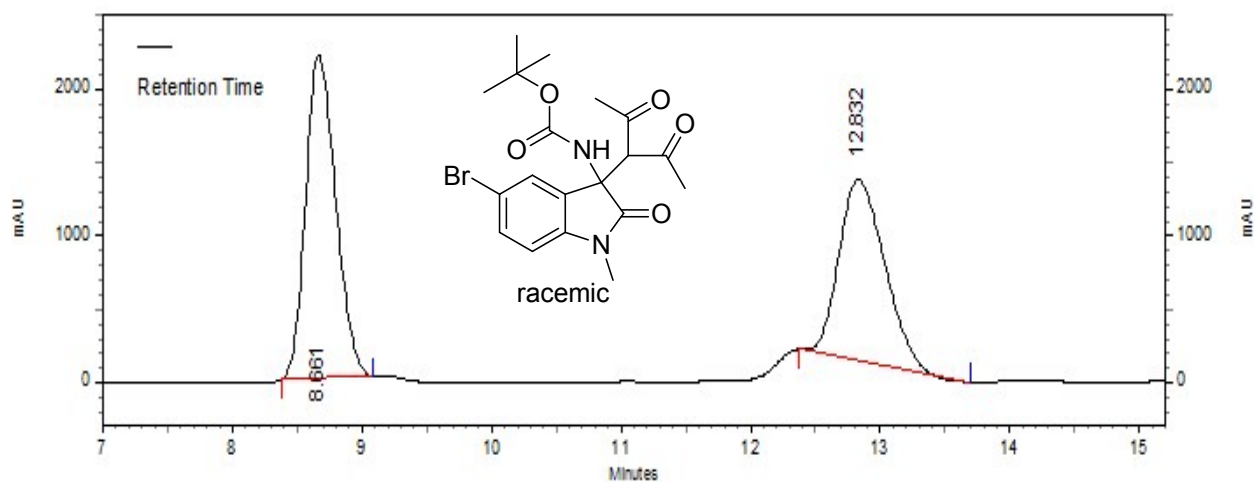

2: 230 nm, 8 nm

| Pk # | Retention Time | Area     | Area Percent | Height  |
|------|----------------|----------|--------------|---------|
| 1    | 8.661          | 35415666 | 54.04        | 2196729 |
| 2    | 12.832         | 30119066 | 45.96        | 1230810 |

|        |  |          |        |         |
|--------|--|----------|--------|---------|
| Totals |  | 65534732 | 100.00 | 3427539 |
|--------|--|----------|--------|---------|

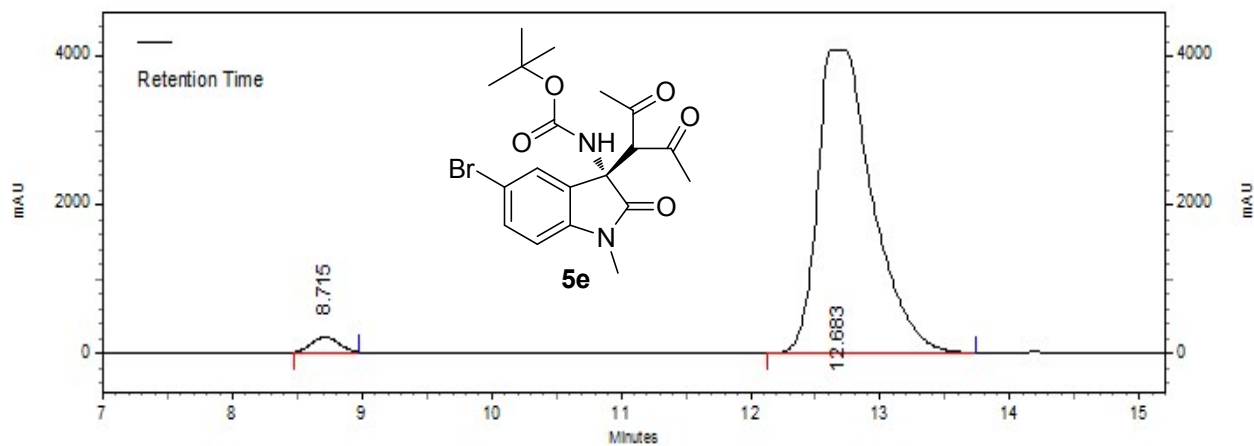

2: 230 nm, 8 nm

| Pk # | Retention Time | Area      | Area Percent | Height  |
|------|----------------|-----------|--------------|---------|
| 1    | 8.715          | 3052056   | 2.48         | 205699  |
| 2    | 12.683         | 120171421 | 97.52        | 4080972 |

|        |  |           |        |         |
|--------|--|-----------|--------|---------|
| Totals |  | 123223477 | 100.00 | 4286671 |
|--------|--|-----------|--------|---------|

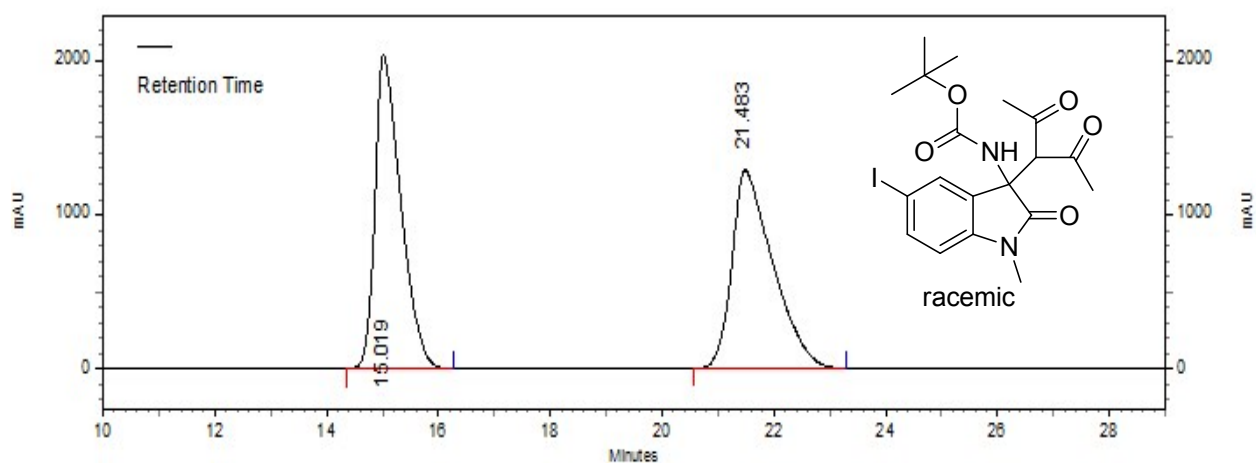

3: 254 nm, 8 nm

| Pk # | Retention Time | Area     | Area Percent | Height  |
|------|----------------|----------|--------------|---------|
| 1    | 15.019         | 65252576 | 49.88        | 2037089 |
| 2    | 21.483         | 65573119 | 50.12        | 1284800 |

|        |  |           |        |         |
|--------|--|-----------|--------|---------|
| Totals |  | 130825695 | 100.00 | 3321889 |
|--------|--|-----------|--------|---------|

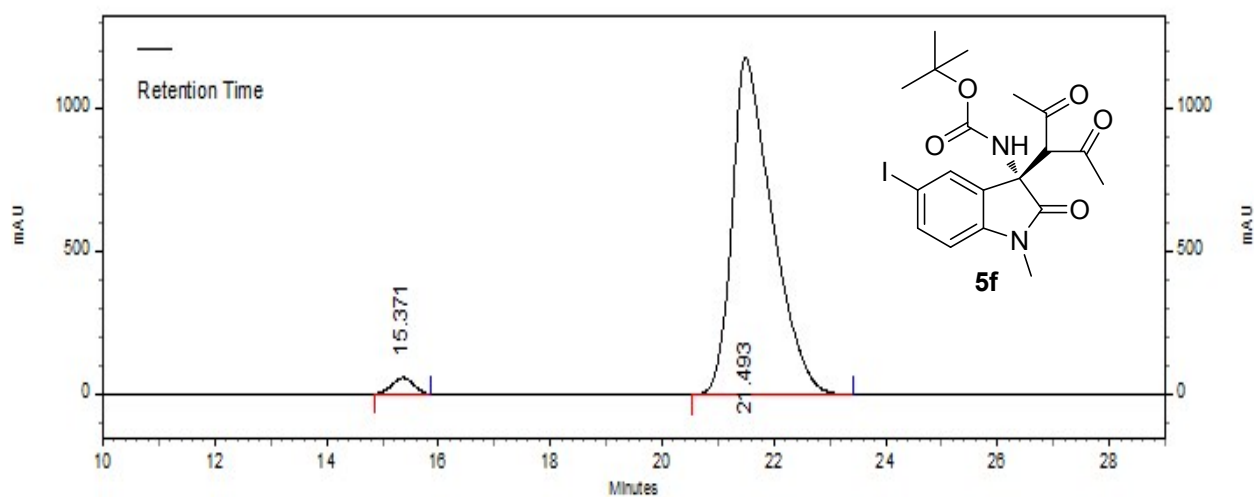

3: 254 nm, 8 nm

| Pk # | Retention Time | Area     | Area Percent | Height  |
|------|----------------|----------|--------------|---------|
| 1    | 15.371         | 1568232  | 2.59         | 57491   |
| 2    | 21.493         | 58900679 | 97.41        | 1178503 |

|        |  |          |        |         |
|--------|--|----------|--------|---------|
| Totals |  | 60468911 | 100.00 | 1235994 |
|--------|--|----------|--------|---------|

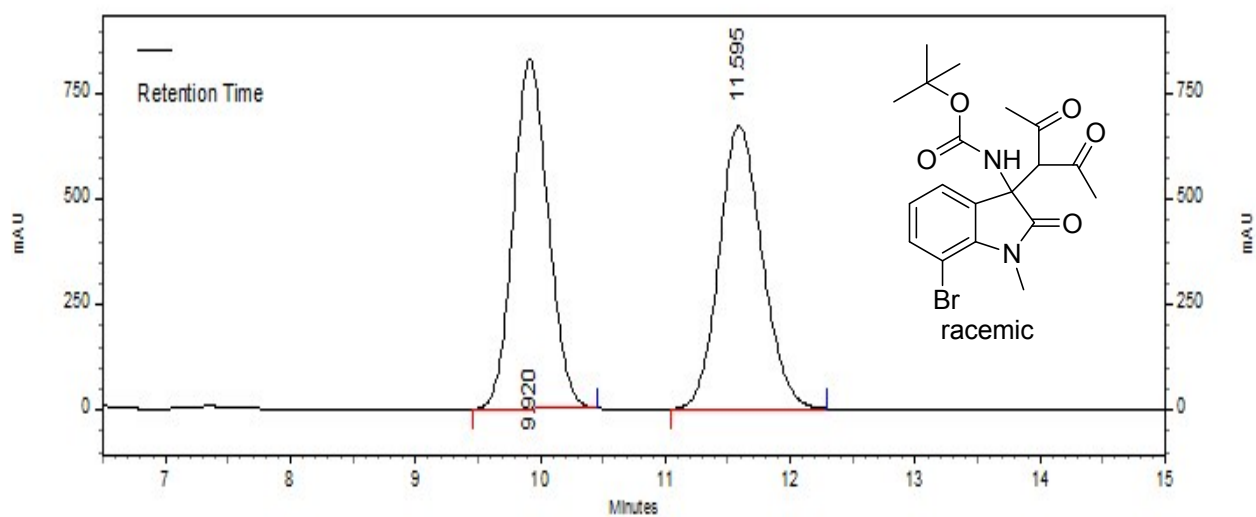

3: 254 nm, 8 nm

| Pk # | Retention Time | Area     | Area Percent | Height |
|------|----------------|----------|--------------|--------|
| 1    | 9.920          | 16118672 | 50.03        | 830502 |
| 2    | 11.595         | 16102533 | 49.97        | 672020 |

|        |  |          |        |         |
|--------|--|----------|--------|---------|
| Totals |  | 32221205 | 100.00 | 1502522 |
|--------|--|----------|--------|---------|

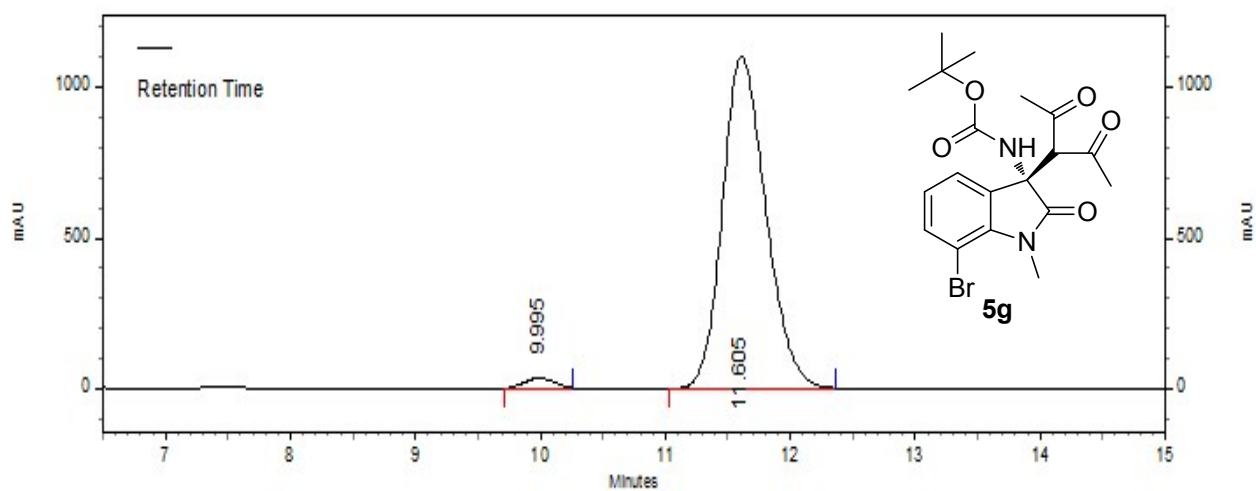

3: 254 nm, 8 nm

| Pk # | Retention Time | Area     | Area Percent | Height  |
|------|----------------|----------|--------------|---------|
| 1    | 9.995          | 553701   | 2.05         | 32743   |
| 2    | 11.605         | 26504330 | 97.95        | 1097171 |

|        |  |          |        |         |
|--------|--|----------|--------|---------|
| Totals |  | 27058031 | 100.00 | 1129914 |
|--------|--|----------|--------|---------|

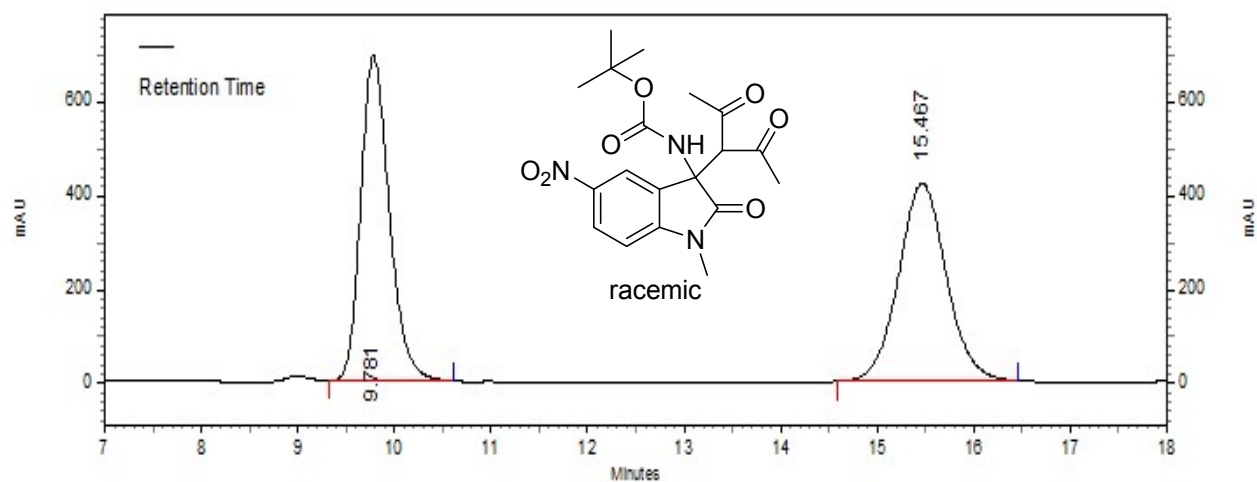

3: 254 nm, 8 nm

| Pk # | Retention Time | Area     | Area Percent | Height |
|------|----------------|----------|--------------|--------|
| 1    | 9.781          | 14299677 | 49.59        | 695807 |
| 2    | 15.467         | 14534447 | 50.41        | 422601 |

|        |  |          |        |         |
|--------|--|----------|--------|---------|
| Totals |  | 28834124 | 100.00 | 1118408 |
|--------|--|----------|--------|---------|

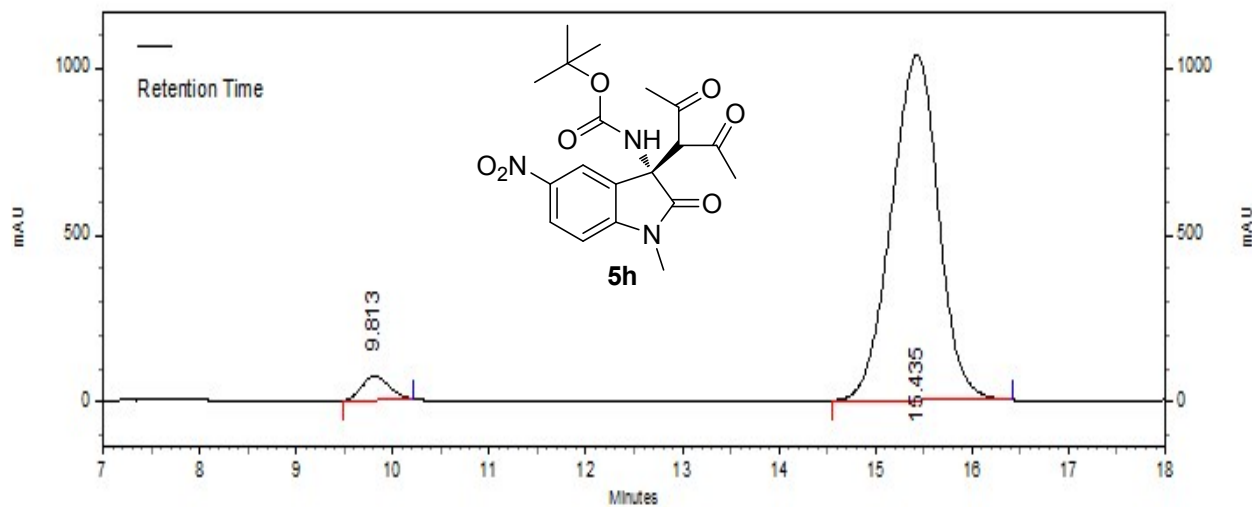

3: 254 nm, 8 nm

| Pk # | Retention Time | Area     | Area Percent | Height  |
|------|----------------|----------|--------------|---------|
| 1    | 9.813          | 1403601  | 3.85         | 72150   |
| 2    | 15.435         | 35020641 | 96.15        | 1034898 |

|        |  |          |        |         |
|--------|--|----------|--------|---------|
| Totals |  | 36424242 | 100.00 | 1107048 |
|--------|--|----------|--------|---------|

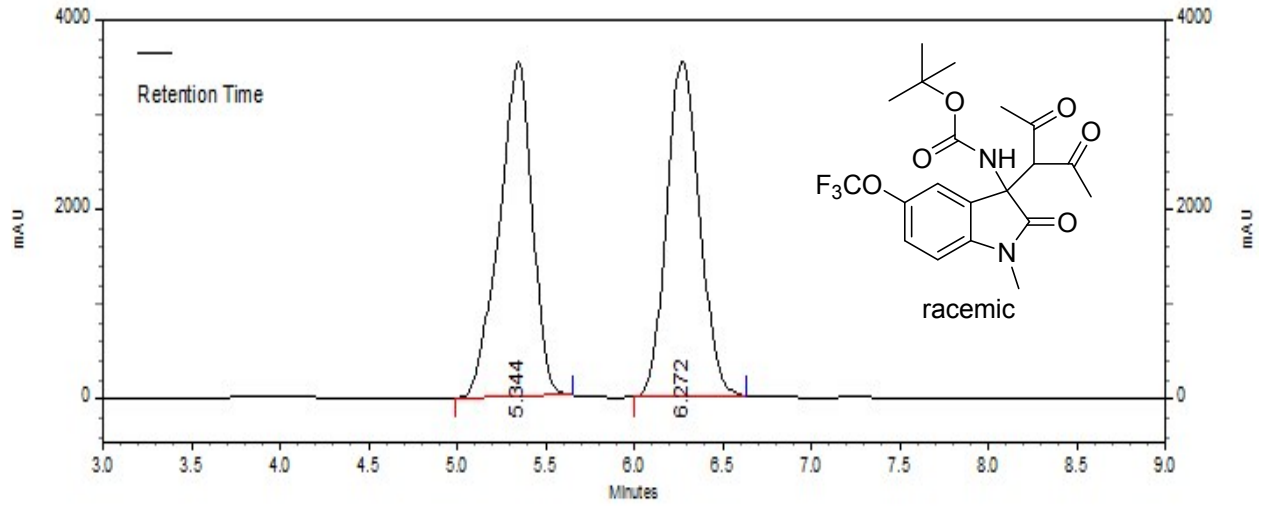

3: 254 nm, 8 nm

| Pk # | Retention Time | Area     | Area Percent | Height  |
|------|----------------|----------|--------------|---------|
| 1    | 5.344          | 45839186 | 50.12        | 3532645 |
| 2    | 6.272          | 45620121 | 49.88        | 3530175 |

|        |  |          |        |         |
|--------|--|----------|--------|---------|
| Totals |  | 91459307 | 100.00 | 7062820 |
|--------|--|----------|--------|---------|

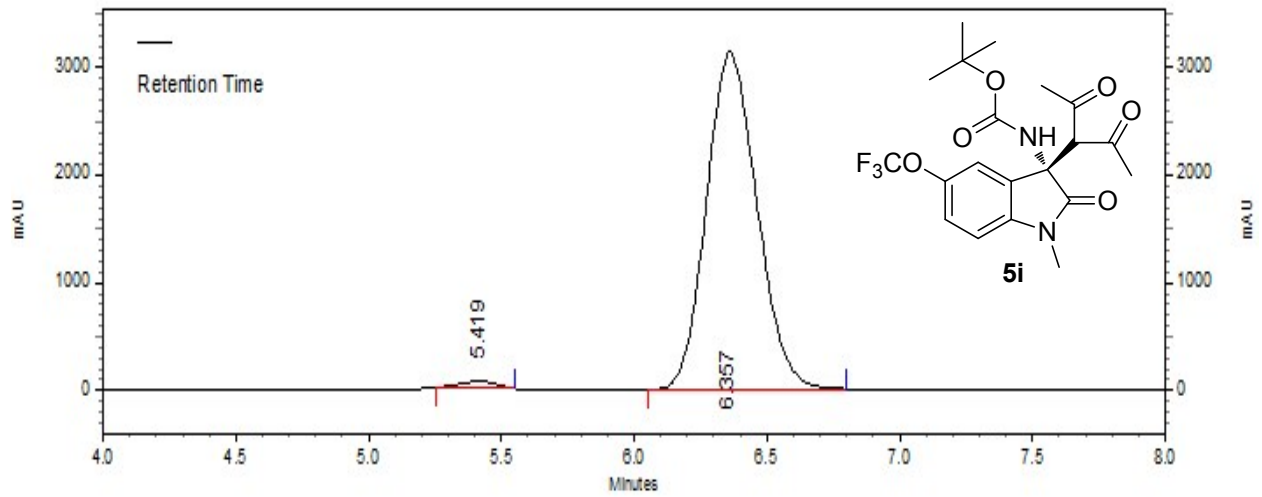

3: 254 nm, 8 nm

| Pk # | Retention Time | Area     | Area Percent | Height  |
|------|----------------|----------|--------------|---------|
| 1    | 5.419          | 531869   | 1.26         | 58723   |
| 2    | 6.357          | 41545765 | 98.74        | 3147689 |

|        |  |          |        |         |
|--------|--|----------|--------|---------|
| Totals |  | 42077634 | 100.00 | 3206412 |
|--------|--|----------|--------|---------|

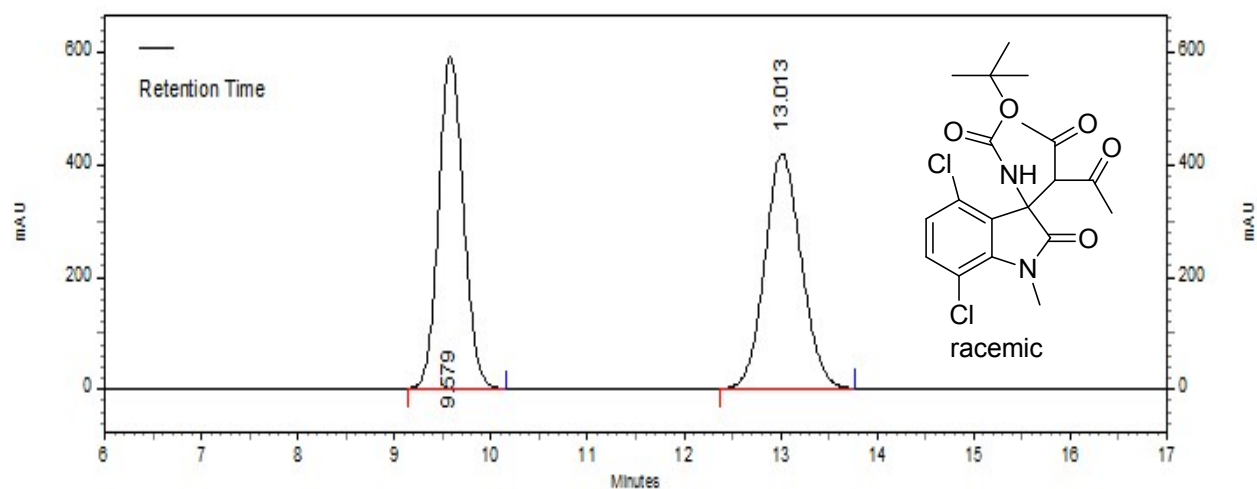

3: 254 nm, 8 nm

| Pk #   | Retention Time | Area     | Area Percent | Height  |
|--------|----------------|----------|--------------|---------|
| 1      | 9.579          | 10490136 | 48.87        | 590511  |
| 2      | 13.013         | 10974343 | 51.13        | 417974  |
| Totals |                | 21464479 | 100.00       | 1008485 |

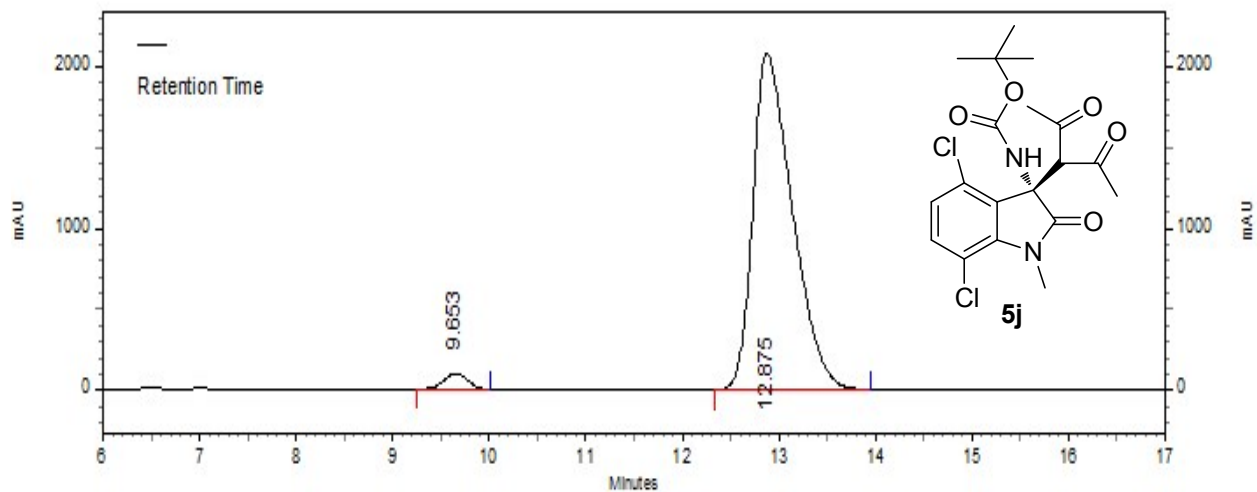

3: 254 nm, 8 nm

| Pk #   | Retention Time | Area     | Area Percent | Height  |
|--------|----------------|----------|--------------|---------|
| 1      | 9.653          | 1807176  | 2.97         | 101445  |
| 2      | 12.875         | 59096648 | 97.03        | 2080374 |
| Totals |                | 60903824 | 100.00       | 2181819 |

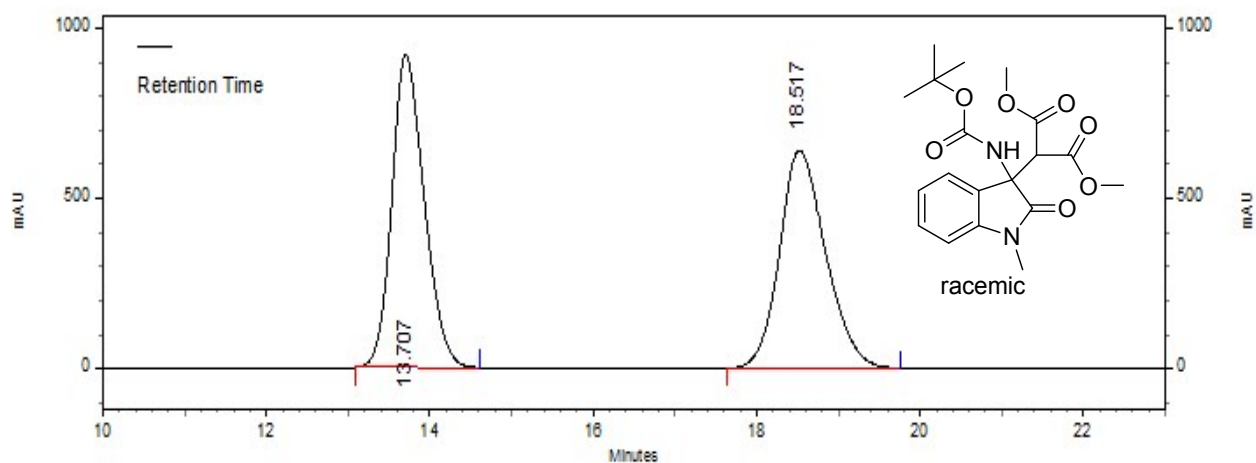

3: 254 nm, 8 nm

| Pk # | Retention Time | Area     | Area Percent | Height |
|------|----------------|----------|--------------|--------|
| 1    | 13.707         | 25210458 | 49.87        | 918573 |
| 2    | 18.517         | 25341270 | 50.13        | 639767 |

|        |  |          |        |         |
|--------|--|----------|--------|---------|
| Totals |  | 50551728 | 100.00 | 1558340 |
|--------|--|----------|--------|---------|

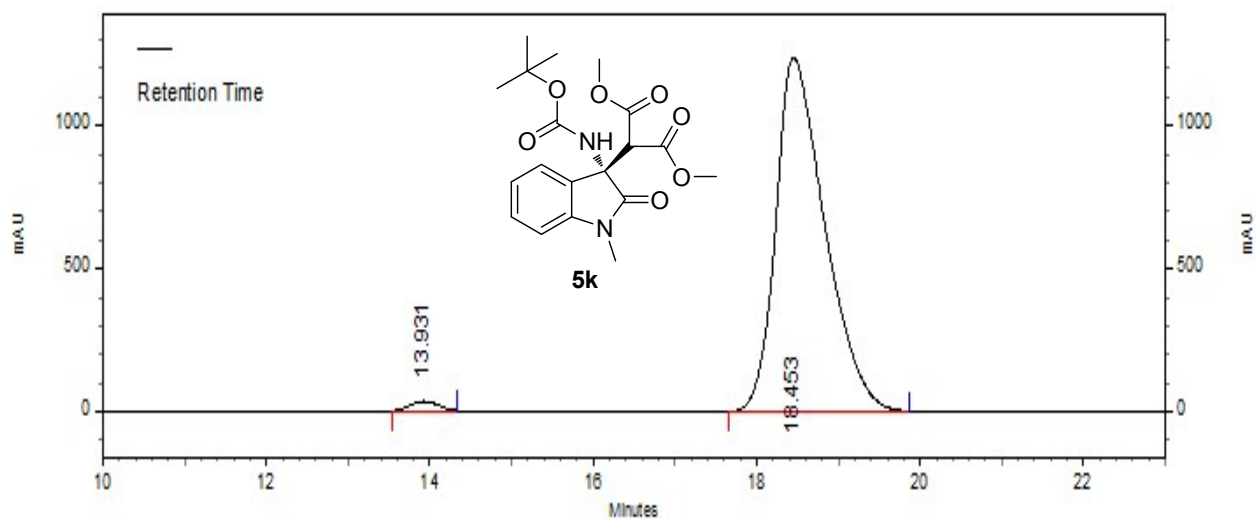

3: 254 nm, 8 nm

| Pk # | Retention Time | Area     | Area Percent | Height  |
|------|----------------|----------|--------------|---------|
| 1    | 13.931         | 803910   | 1.53         | 33640   |
| 2    | 18.453         | 51910730 | 98.47        | 1236224 |

|        |  |          |        |         |
|--------|--|----------|--------|---------|
| Totals |  | 52714640 | 100.00 | 1269864 |
|--------|--|----------|--------|---------|



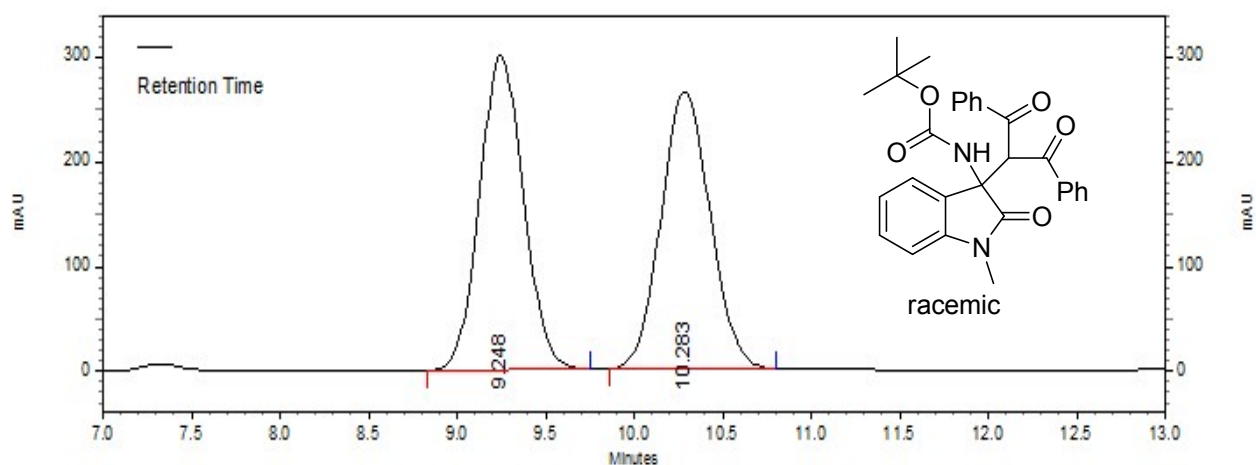

3: 254 nm, 8  
nm

| Pk # | Retention Time | Area    | Area Percent | Height |
|------|----------------|---------|--------------|--------|
| 1    | 9.248          | 5205964 | 50.38        | 300916 |
| 2    | 10.283         | 5127438 | 49.62        | 264495 |

|        |  |          |        |        |
|--------|--|----------|--------|--------|
| Totals |  | 10333402 | 100.00 | 565411 |
|--------|--|----------|--------|--------|

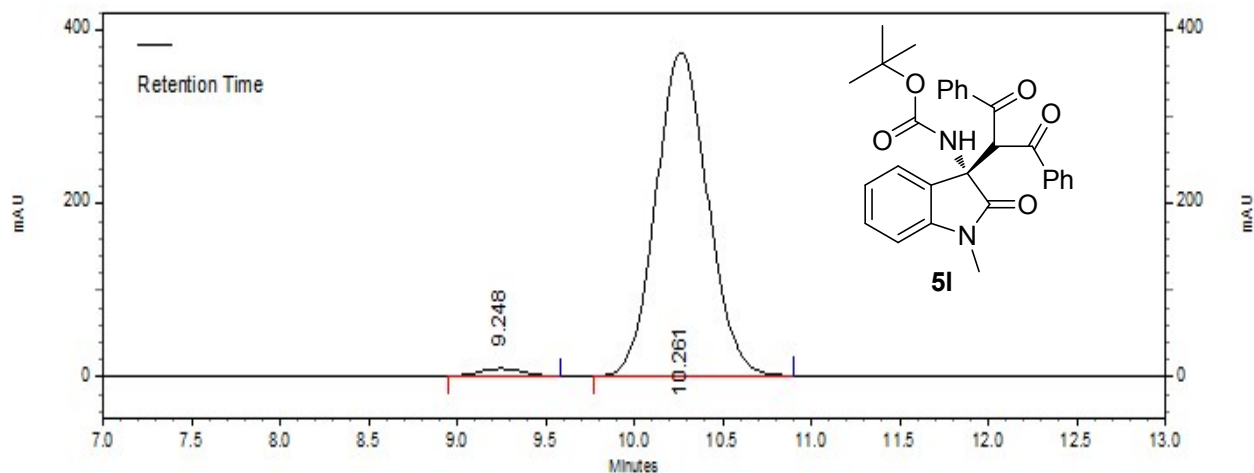

3: 254 nm, 8  
nm

| Pk # | Retention Time | Area    | Area Percent | Height |
|------|----------------|---------|--------------|--------|
| 1    | 9.248          | 149981  | 1.94         | 8758   |
| 2    | 10.261         | 7590272 | 98.06        | 373191 |

|        |  |         |        |        |
|--------|--|---------|--------|--------|
| Totals |  | 7740253 | 100.00 | 381949 |
|--------|--|---------|--------|--------|

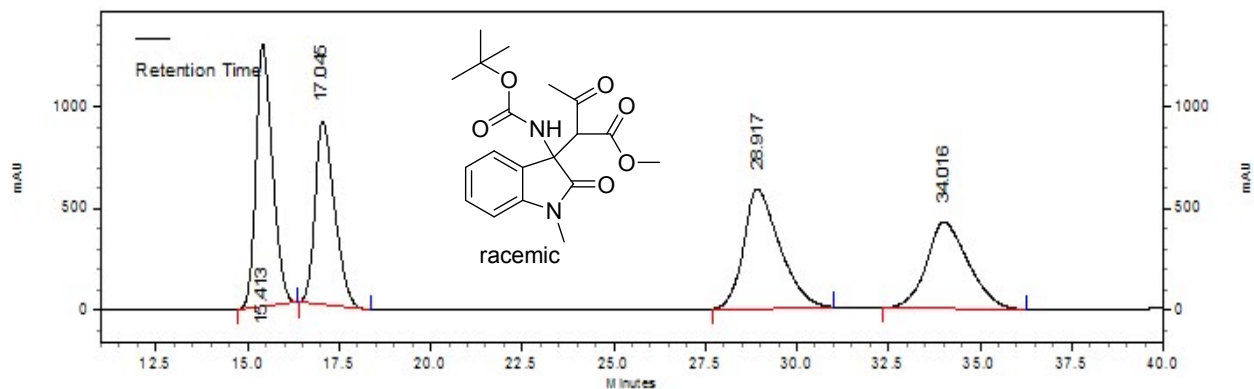

3: 254 nm, 8 nm

| Pk # | Retention Time | Area     | Area Percent | Height  |
|------|----------------|----------|--------------|---------|
| 1    | 15.413         | 40246586 | 27.35        | 1288799 |
| 2    | 17.045         | 33271425 | 22.61        | 901611  |
| 3    | 28.917         | 39999609 | 27.18        | 585388  |
| 4    | 34.016         | 33661066 | 22.87        | 424125  |

|        |  |           |        |         |
|--------|--|-----------|--------|---------|
| Totals |  | 147178686 | 100.00 | 3199923 |
|--------|--|-----------|--------|---------|

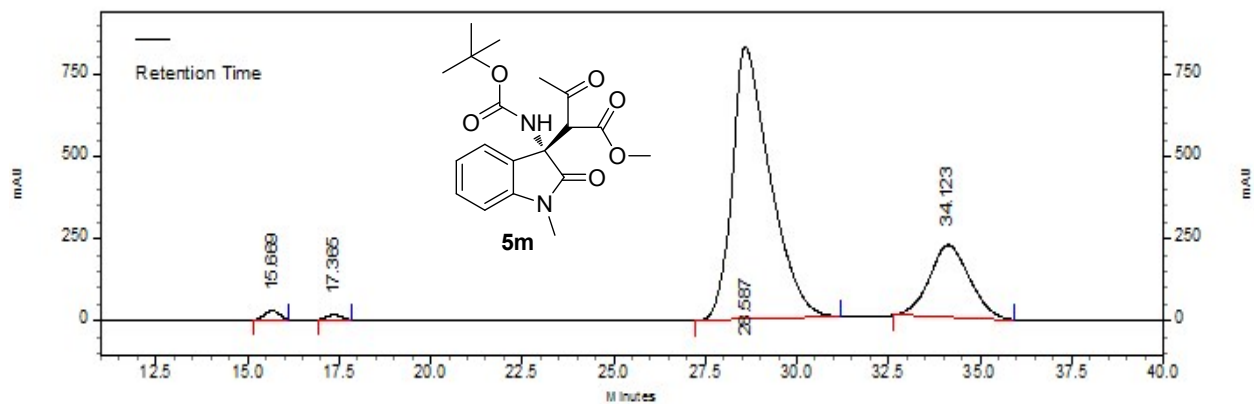

3: 254 nm, 8 nm

| Pk # | Retention Time | Area     | Area Percent | Height |
|------|----------------|----------|--------------|--------|
| 1    | 15.669         | 785960   | 1.02         | 28078  |
| 2    | 17.365         | 432759   | 0.56         | 14728  |
| 3    | 28.587         | 59405700 | 76.83        | 829082 |
| 4    | 34.123         | 16693814 | 21.59        | 219006 |

|        |  |          |        |         |
|--------|--|----------|--------|---------|
| Totals |  | 77318233 | 100.00 | 1090894 |
|--------|--|----------|--------|---------|

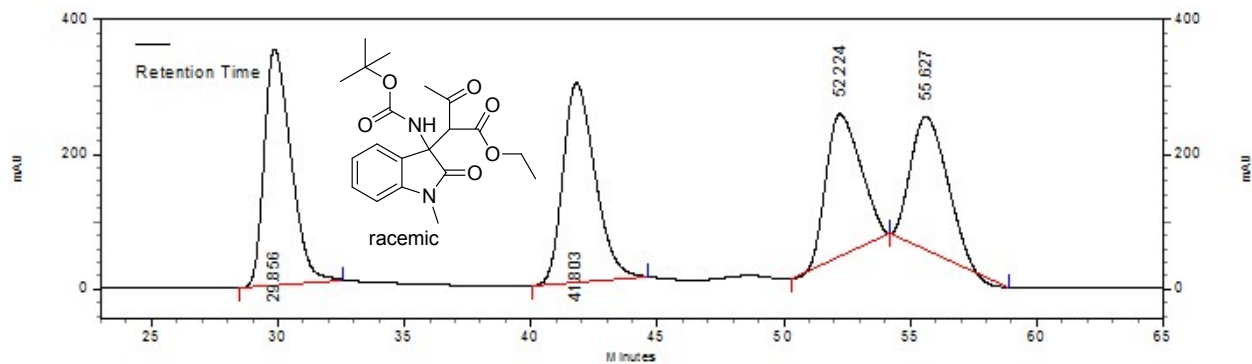

3: 254 nm, 8 nm

| Pk # | Retention Time | Area     | Area Percent | Height |
|------|----------------|----------|--------------|--------|
| 1    | 29.856         | 25657395 | 28.07        | 350072 |
| 2    | 41.803         | 26037267 | 28.48        | 295363 |
| 3    | 52.224         | 20044595 | 21.93        | 211133 |
| 4    | 55.627         | 19681801 | 21.53        | 197626 |

| Totals |  |          |        |         |
|--------|--|----------|--------|---------|
|        |  | 91421058 | 100.00 | 1054194 |

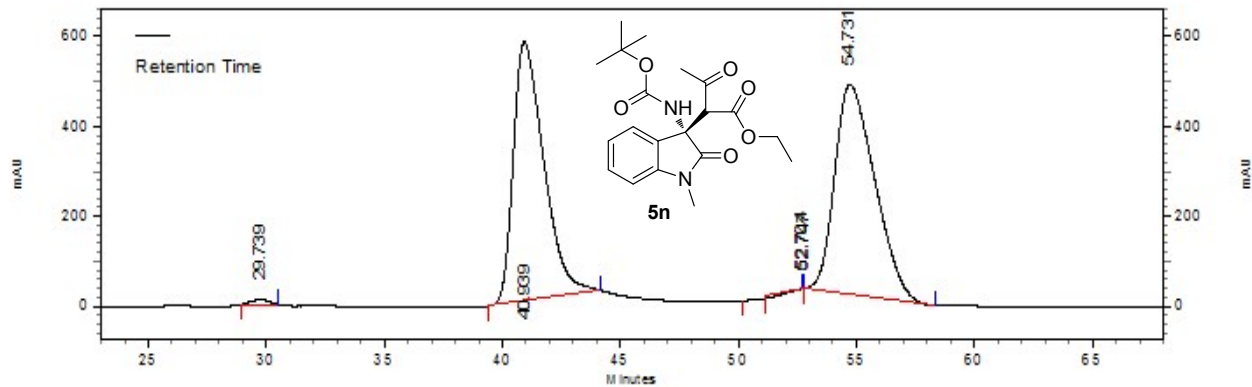

3: 254 nm, 8 nm

| Pk # | Retention Time | Area     | Area Percent | Height |
|------|----------------|----------|--------------|--------|
| 1    | 29.739         | 616603   | 0.57         | 11162  |
| 2    | 40.939         | 51725824 | 47.78        | 576477 |
| 3    | 52.747         | 442206   | 0.41         | 17     |
| 4    | 54.731         | 55211778 | 51.00        | 466881 |

| Totals |  |           |        |         |
|--------|--|-----------|--------|---------|
|        |  | 108248384 | 100.00 | 1054599 |

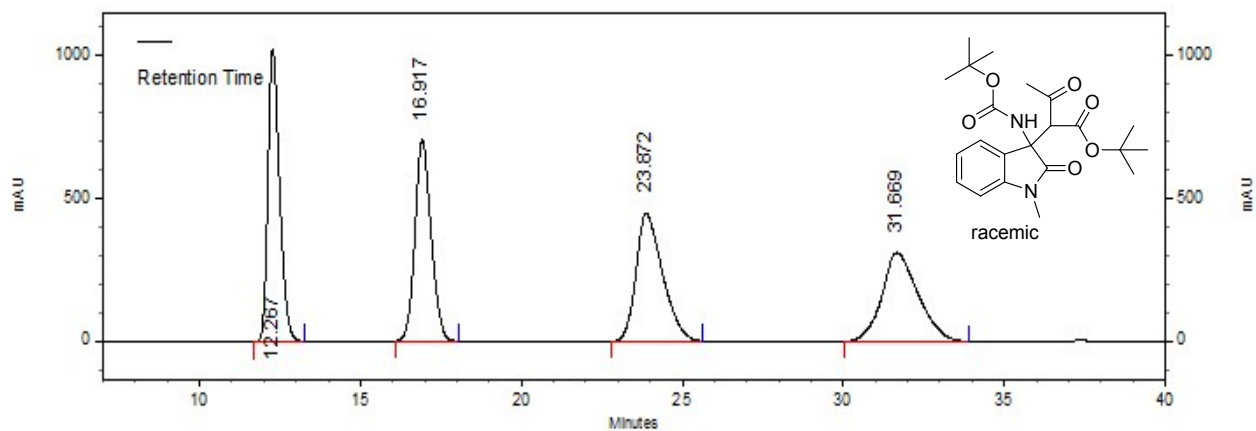

3: 254 nm, 8 nm

| Pk # | Retention Time | Area     | Area Percent | Height  |
|------|----------------|----------|--------------|---------|
| 1    | 12.267         | 25853632 | 25.73        | 1022331 |
| 2    | 16.917         | 24566640 | 24.45        | 703002  |
| 3    | 23.872         | 25677157 | 25.55        | 447132  |
| 4    | 31.669         | 24385402 | 24.27        | 310364  |

|        |  |           |        |         |
|--------|--|-----------|--------|---------|
| Totals |  | 100482831 | 100.00 | 2482829 |
|--------|--|-----------|--------|---------|

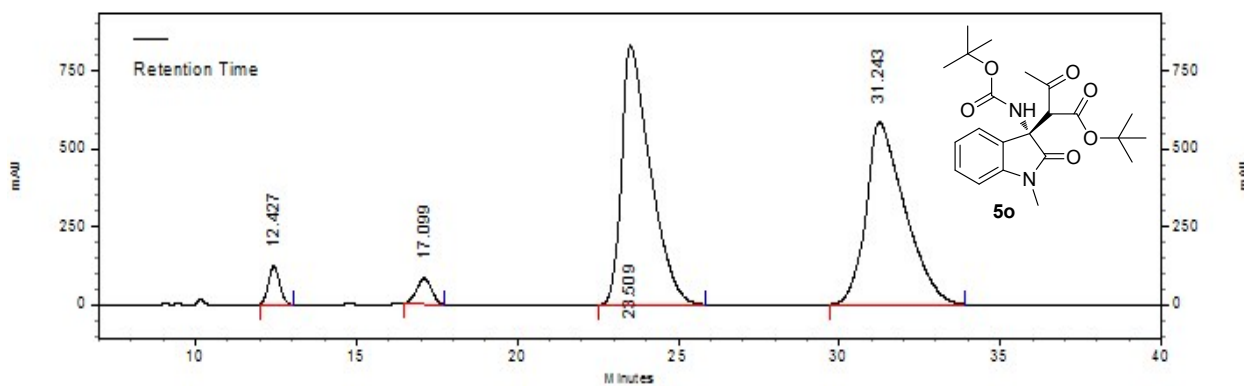

3: 254 nm, 8 nm

| Pk # | Retention Time | Area     | Area Percent | Height |
|------|----------------|----------|--------------|--------|
| 1    | 12.427         | 3005386  | 2.83         | 123580 |
| 2    | 17.099         | 2687326  | 2.53         | 82760  |
| 3    | 23.509         | 51413117 | 48.47        | 830215 |
| 4    | 31.243         | 48974680 | 46.17        | 582900 |

|        |  |           |        |         |
|--------|--|-----------|--------|---------|
| Totals |  | 106080509 | 100.00 | 1619455 |
|--------|--|-----------|--------|---------|

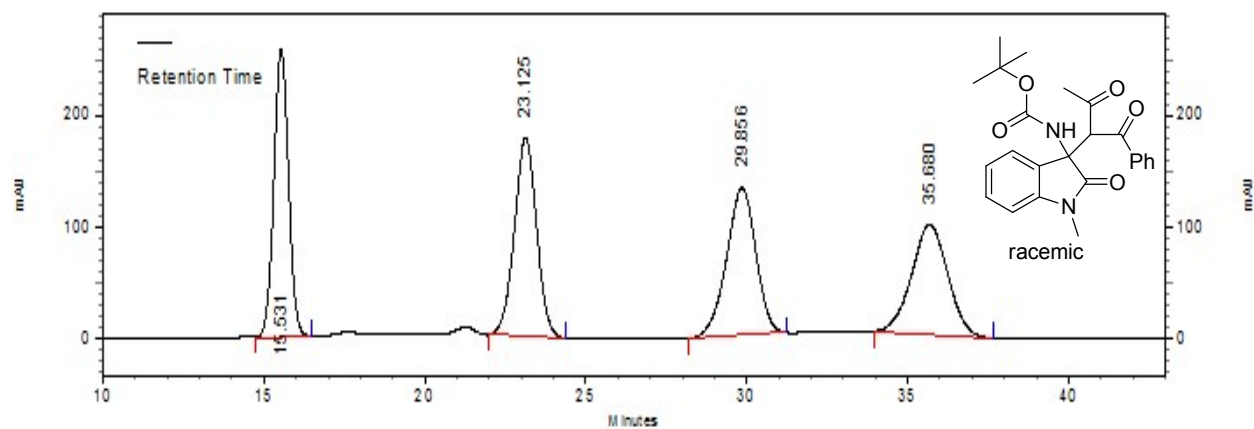

3: 254 nm, 8 nm

| Pk # | Retention Time | Area    | Area Percent | Height |
|------|----------------|---------|--------------|--------|
| 1    | 15.531         | 8139306 | 24.79        | 257482 |
| 2    | 23.125         | 8574362 | 26.12        | 178329 |
| 3    | 29.856         | 8402038 | 25.59        | 132360 |
| 4    | 35.680         | 7716533 | 23.50        | 98585  |

|        |  |          |        |        |
|--------|--|----------|--------|--------|
| Totals |  | 32832239 | 100.00 | 666756 |
|--------|--|----------|--------|--------|

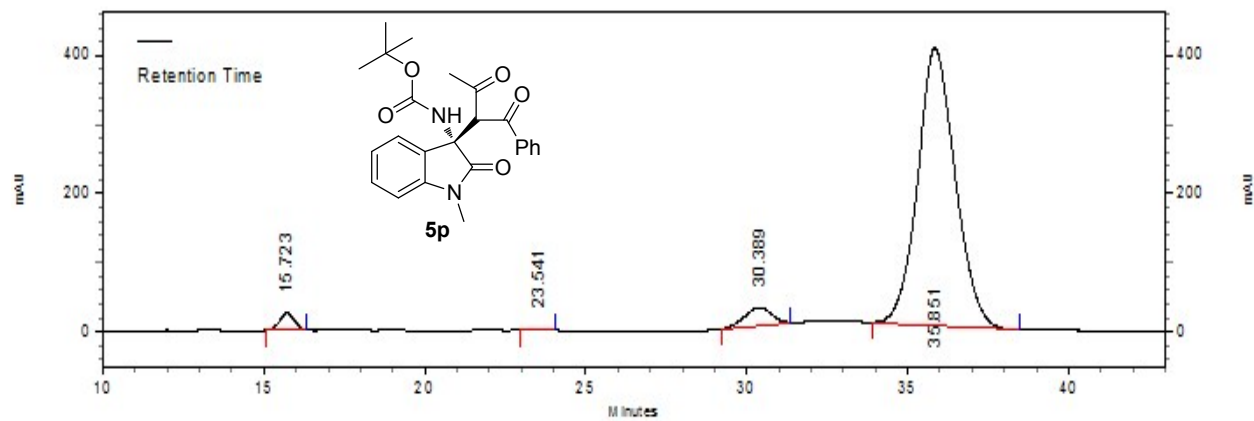

3: 254 nm, 8 nm

| Pk # | Retention Time | Area     | Area Percent | Height |
|------|----------------|----------|--------------|--------|
| 1    | 15.723         | 762394   | 2.18         | 24591  |
| 2    | 23.541         | 80017    | 0.23         | 2225   |
| 3    | 30.389         | 1514722  | 4.32         | 25880  |
| 4    | 35.851         | 32674347 | 93.27        | 402534 |

|        |  |          |        |        |
|--------|--|----------|--------|--------|
| Totals |  | 35031480 | 100.00 | 455230 |
|--------|--|----------|--------|--------|

## 5) X-ray structure report for product 5g

### *Experimental*

#### Data Collection

A colorless chunk crystal of  $C_{19}H_{23}BrN_2O_5$  having approximate dimensions of 0.470 x 0.390 x 0.320 mm was mounted on a glass fiber. All measurements were made on a Rigaku SCX mini diffractometer using graphite monochromated Mo- $K\alpha$  radiation.

The crystal-to-detector distance was 52.00 mm.

Cell constants and an orientation matrix for data collection corresponded to a primitive monoclinic cell with dimensions:

$$\begin{aligned}a &= 8.9423(8) \text{ \AA} \\b &= 10.714(1) \text{ \AA} \quad \beta = 94.596(3)^\circ \\c &= 10.4490(9) \text{ \AA} \\V &= 997.8(2) \text{ \AA}^3\end{aligned}$$

For  $Z = 2$  and F.W. = 439.31, the calculated density is 1.462 g/cm<sup>3</sup>. Based on the reflection conditions of:

$$0k0: k = 2n$$

packing considerations, a statistical analysis of intensity distribution, and the successful solution and refinement of the structure, the space group was determined to be:

$$P2_1 (\#4)$$

The data were collected at a temperature of  $20 \pm 1^\circ\text{C}$  to a maximum  $2\theta$  value of  $55.0^\circ$ . A total of 540 oscillation images were collected. A sweep of data was done using  $\omega$  oscillations from  $-120.0$  to  $60.0^\circ$  in  $1.0^\circ$  steps. The exposure rate was 8.0 [sec./ $^\circ$ ]. The detector swing angle was  $-30.80^\circ$ . A second sweep was performed using  $\omega$  oscillations from  $-120.0$  to  $60.0^\circ$  in  $1.0^\circ$  steps. The exposure rate was 8.0 [sec./ $^\circ$ ]. The detector swing angle was  $-30.80^\circ$ . Another sweep was performed using  $\omega$  oscillations from  $-120.0$  to  $60.0^\circ$  in  $1.0^\circ$  steps. The exposure rate was 8.0 [sec./ $^\circ$ ]. The detector swing angle was  $-30.80^\circ$ . The crystal-to-detector distance was 52.00 mm. Readout was performed in the 0.146 mm pixel mode.

## Data Reduction

Of the 10269 reflections that were collected, 4547 were unique ( $R_{\text{int}} = 0.0684$ ); equivalent reflections were merged. Data were collected and processed using CrystalClear (Rigaku).

The linear absorption coefficient,  $\mu$ , for Mo-K $\alpha$  radiation is 20.973 cm<sup>-1</sup>. An empirical absorption correction was applied which resulted in transmission factors ranging from 0.251 to 0.511. The data were corrected for Lorentz and polarization effects.

## Structure Solution and Refinement

The structure was solved by direct methods<sup>2</sup> and expanded using Fourier techniques. The non-hydrogen atoms were refined anisotropically. Hydrogen atoms were refined using the riding model. The final cycle of full-matrix least-squares refinement<sup>3</sup> on  $F^2$  was based on 4547 observed reflections and 248 variable parameters and converged (largest parameter shift was 0.02 times its esd) with unweighted and weighted agreement factors of:

$$R1 = \sum ||F_o| - |F_c|| / \sum |F_o| = 0.0559$$

$$wR2 = [ \sum ( w (F_o^2 - F_c^2)^2 ) / \sum w(F_o^2)^2 ]^{1/2} = 0.1614$$

The standard deviation of an observation of unit weight<sup>4</sup> was 0.95. Unit weights were used. The maximum and minimum peaks on the final difference Fourier map corresponded to 0.55 and -0.54 e<sup>-</sup>/Å<sup>3</sup>, respectively. The absolute structure was deduced based on Flack parameter, 0.036(10), using 2140 Friedel pairs.<sup>5</sup>

Neutral atom scattering factors were taken from Cromer and Waber<sup>6</sup>. Anomalous dispersion effects were included in  $F_{\text{calc}}$ <sup>7</sup>; the values for  $\Delta f'$  and  $\Delta f''$  were those of Creagh and McAuley<sup>8</sup>. The values for the mass attenuation coefficients are those of Creagh and Hubbell<sup>9</sup>. All calculations were performed using the CrystalStructure<sup>10</sup> crystallographic software package except for refinement, which was performed using SHELXL-97<sup>11</sup>.

## References

(1) CrystalClear: Rigaku Corporation, 1999. CrystalClear Software User's Guide, Molecular Structure Corporation, (c) 2000. J.W. Pflugrath (1999) Acta Cryst. D55, 1718-1725.

(2) SIR92: Altomare, A., Cascarano, G., Giacovazzo, C., Guagliardi, A., Burla, M., Polidori, G., and Camalli, M. (1994) J. Appl. Cryst., 27, 435.

(3) Least Squares function minimized: (SHELXL97)

$$\sum w(F_o^2 - F_c^2)^2 \quad \text{where } w = \text{Least Squares weights.}$$

(4) Standard deviation of an observation of unit weight:

$$[\sum w(F_o^2 - F_c^2)^2 / (N_o - N_v)]^{1/2}$$

where:  $N_o$  = number of observations  
 $N_v$  = number of variables

(5) Flack, H. D. (1983), Acta Cryst. A39, 876-881.

(6) Cromer, D. T. & Waber, J. T.; "International Tables for X-ray Crystallography", Vol. IV, The Kynoch Press, Birmingham, England, Table 2.2 A (1974).

(7) Ibers, J. A. & Hamilton, W. C.; Acta Crystallogr., 17, 781 (1964).

(8) Creagh, D. C. & McAuley, W.J. ; "International Tables for Crystallography", Vol C, (A.J.C. Wilson, ed.), Kluwer Academic Publishers, Boston, Table 4.2.6.8, pages 219-222 (1992).

(9) Creagh, D. C. & Hubbell, J.H.; "International Tables for Crystallography", Vol C, (A.J.C. Wilson, ed.), Kluwer Academic Publishers, Boston, Table 4.2.4.3, pages 200-206 (1992).

(10) CrystalStructure 4.0: Crystal Structure Analysis Package, Rigaku Corporation (2000-2010). Tokyo 196-8666, Japan.

(11) SHELX97: Sheldrick, G.M. (2008). Acta Cryst. A64, 112-122.



## EXPERIMENTAL DETAILS

### A. Crystal Data

|                         |                                                                                                                                                         |
|-------------------------|---------------------------------------------------------------------------------------------------------------------------------------------------------|
| Empirical Formula       | $C_{19}H_{23}BrN_2O_5$                                                                                                                                  |
| Formula Weight          | 439.31                                                                                                                                                  |
| Crystal Color, Habit    | colorless, chunk                                                                                                                                        |
| Crystal Dimensions      | 0.470 X 0.390 X 0.320 mm                                                                                                                                |
| Crystal System          | monoclinic                                                                                                                                              |
| Lattice Type            | Primitive                                                                                                                                               |
| Lattice Parameters      | $a = 8.9423(8) \text{ \AA}$<br>$b = 10.714(1) \text{ \AA}$<br>$c = 10.4490(9) \text{ \AA}$<br>$\beta = 94.596(3)^\circ$<br>$V = 997.8(2) \text{ \AA}^3$ |
| Space Group             | $P2_1$ (#4)                                                                                                                                             |
| Z value                 | 2                                                                                                                                                       |
| $D_{\text{calc}}$       | $1.462 \text{ g/cm}^3$                                                                                                                                  |
| $F_{000}$               | 452.00                                                                                                                                                  |
| $\mu(\text{MoK}\alpha)$ | $20.973 \text{ cm}^{-1}$                                                                                                                                |

## B. Intensity Measurements

|                             |                                                                                   |
|-----------------------------|-----------------------------------------------------------------------------------|
| Diffractometer              | SCX mini                                                                          |
| Radiation                   | MoK $\alpha$ ( $\lambda = 0.71075 \text{ \AA}$ )<br>graphite monochromated        |
| Voltage, Current            | 50kV, 30mA                                                                        |
| Temperature                 | 20.0°C                                                                            |
| Detector Aperture           | 75 mm (diameter)                                                                  |
| Data Images                 | 540 exposures                                                                     |
| $\omega$ oscillation Range  | -120.0 - 60.0°                                                                    |
| Exposure Rate               | 8.0 sec./°                                                                        |
| Detector Swing Angle        | -30.80°                                                                           |
| $\omega$ oscillation Range  | -120.0 - 60.0°                                                                    |
| Exposure Rate               | 8.0 sec./°                                                                        |
| Detector Swing Angle        | -30.80°                                                                           |
| $\omega$ oscillation Range  | -120.0 - 60.0°                                                                    |
| Exposure Rate               | 8.0 sec./°                                                                        |
| Detector Swing Angle        | -30.80°                                                                           |
| Detector Position           | 52.00 mm                                                                          |
| Pixel Size                  | 0.146 mm                                                                          |
| $2\theta_{\max}$            | 55.0°                                                                             |
| No. of Reflections Measured | Total: 10269<br>Unique: 4547 ( $R_{\text{int}} = 0.0684$ )<br>Friedel pairs: 2140 |

Corrections

Lorentz-polarization

Absorption

(trans. factors: 0.251 - 0.511)

### C. Structure Solution and Refinement

|                                        |                                                                                                                        |
|----------------------------------------|------------------------------------------------------------------------------------------------------------------------|
| Structure Solution                     | Direct Methods (SIR92)                                                                                                 |
| Refinement                             | Full-matrix least-squares on F <sup>2</sup>                                                                            |
| Function Minimized                     | $\Sigma w (F_o^2 - F_c^2)^2$                                                                                           |
| Least Squares Weights                  | $w = 1 / [ \sigma^2(F_o^2) + (0.1000 \cdot P)^2 + 0.0000 \cdot P ]$<br>where $P = (\text{Max}(F_o^2, 0) + 2F_c^2) / 3$ |
| 2 $\theta_{\text{max}}$ cutoff         | 55.0 $^\circ$                                                                                                          |
| Anomalous Dispersion                   | All non-hydrogen atoms                                                                                                 |
| No. Observations (All reflections)     | 4547                                                                                                                   |
| No. Variables                          | 248                                                                                                                    |
| Reflection/Parameter Ratio             | 18.33                                                                                                                  |
| Residuals: R1 ( $I > 2.00\sigma(I)$ )  | 0.0559                                                                                                                 |
| Residuals: R (All reflections)         | 0.0683                                                                                                                 |
| Residuals: wR2 (All reflections)       | 0.1614                                                                                                                 |
| Goodness of Fit Indicator              | 0.952                                                                                                                  |
| Flack Parameter (Friedel pairs = 2140) | 0.036(10)                                                                                                              |
| Max Shift/Error in Final Cycle         | 0.016                                                                                                                  |
| Maximum peak in Final Diff. Map        | 0.55 e <sup>-</sup> /Å <sup>3</sup>                                                                                    |
| Minimum peak in Final Diff. Map        | -0.54 e <sup>-</sup> /Å <sup>3</sup>                                                                                   |

Table 1. Atomic coordinates and  $B_{\text{iso}}/B_{\text{eq}}$

| atom | x          | y           | z          | $B_{\text{eq}}$ |
|------|------------|-------------|------------|-----------------|
| Br1  | 0.26330(6) | -1.20023(3) | 0.68976(5) | 5.59(2)         |
| O1   | 0.3960(3)  | -0.7981(4)  | 1.0328(4)  | 4.83(7)         |
| O2   | 0.2760(6)  | -0.4809(4)  | 0.7496(5)  | 6.7(1)          |
| O3   | 0.3646(4)  | -0.6795(3)  | 0.7415(3)  | 3.95(6)         |
| O4   | -0.1196(4) | -0.6230(4)  | 0.9239(5)  | 5.40(8)         |
| O5   | 0.1167(6)  | -0.6139(5)  | 1.1374(5)  | 6.4(1)          |
| N1   | 0.3168(4)  | -0.9436(3)  | 0.8810(4)  | 3.17(6)         |
| N2   | 0.1881(5)  | -0.6335(4)  | 0.8694(5)  | 3.98(8)         |
| C1   | 0.3096(5)  | -0.8331(4)  | 0.9454(4)  | 3.41(7)         |
| C2   | 0.1661(5)  | -0.7652(4)  | 0.8921(4)  | 3.01(7)         |
| C3   | 0.1184(4)  | -0.8420(4)  | 0.7758(4)  | 3.08(6)         |
| C4   | 0.0084(5)  | -0.8201(5)  | 0.6801(4)  | 3.99(8)         |
| C5   | -0.0173(6) | -0.9065(6)  | 0.5829(5)  | 5.1(1)          |
| C6   | 0.0637(7)  | -1.0163(6)  | 0.5869(5)  | 4.9(1)          |
| C7   | 0.1738(5)  | -1.0398(4)  | 0.6843(4)  | 3.91(8)         |
| C8   | 0.2049(4)  | -0.9498(4)  | 0.7789(4)  | 2.87(6)         |
| C9   | 0.2780(5)  | -0.5884(4)  | 0.7833(5)  | 3.91(8)         |
| C10  | 0.4563(5)  | -0.6613(5)  | 0.6311(5)  | 4.01(8)         |
| C11  | 0.5778(7)  | -0.5689(7)  | 0.6634(6)  | 5.9(2)          |
| C12  | 0.3560(8)  | -0.6221(9)  | 0.5143(6)  | 7.2(2)          |
| C13  | 0.5196(8)  | -0.7905(6)  | 0.6137(7)  | 6.0(2)          |
| C14  | 0.0510(4)  | -0.7842(4)  | 0.9961(4)  | 3.18(7)         |
| C15  | -0.1027(5) | -0.7312(5)  | 0.9543(4)  | 3.70(8)         |
| C16  | -0.2317(5) | -0.8193(5)  | 0.9553(5)  | 4.33(9)         |
| C17  | 0.1037(5)  | -0.7245(5)  | 1.1265(5)  | 4.14(9)         |
| C18  | 0.1309(8)  | -0.8138(7)  | 1.2366(6)  | 6.1(2)          |
| C19  | 0.4410(5)  | -1.0292(5)  | 0.9128(6)  | 4.61(9)         |

$$B_{\text{eq}} = 8/3 \pi^2 (U_{11}(aa^*)^2 + U_{22}(bb^*)^2 + U_{33}(cc^*)^2 + 2U_{12}(aa^*bb^*)\cos \gamma + 2U_{13}(aa^*cc^*)\cos \beta + 2U_{23}(bb^*cc^*)\cos \alpha)$$

Table 2. Atomic coordinates and  $B_{\text{iso}}$  involving hydrogen atoms

| atom | x        | y        | z        | $B_{\text{iso}}$ |
|------|----------|----------|----------|------------------|
| H2   | 0.1409   | -0.5810  | 0.9137   | 4.77             |
| H4   | -0.0486  | -0.7475  | 0.6804   | 4.79             |
| H5A  | -0.0887  | -0.8909  | 0.5152   | 6.12             |
| H11A | 0.5342   | -0.4899  | 0.6828   | 7.12             |
| H11B | 0.6375   | -0.5595  | 0.5917   | 7.12             |
| H11C | 0.6400   | -0.5976  | 0.7367   | 7.12             |
| H12A | 0.4147   | -0.6148  | 0.4417   | 8.58             |
| H12B | 0.3106   | -0.5431  | 0.5306   | 8.58             |
| H12C | 0.2791   | -0.6837  | 0.4967   | 8.58             |
| H13A | 0.5777   | -0.7910  | 0.5404   | 7.23             |
| H13B | 0.4389   | -0.8493  | 0.6009   | 7.23             |
| H13C | 0.5825   | -0.8131  | 0.6889   | 7.23             |
| H14  | 0.0398   | -0.8741  | 1.0096   | 3.82             |
| H16A | -0.2853  | -0.8206  | 0.8720   | 5.20             |
| H16B | -0.2977  | -0.7924  | 1.0180   | 5.20             |
| H16C | -0.1952  | -0.9015  | 0.9767   | 5.20             |
| H18A | 0.0624   | -0.7961  | 1.3004   | 7.37             |
| H18B | 0.2321   | -0.8047  | 1.2736   | 7.37             |
| H18C | 0.1156   | -0.8978  | 1.2062   | 7.37             |
| H19A | 0.5050   | -1.0316  | 0.8433   | 5.53             |
| H19B | 0.4024   | -1.1112  | 0.9267   | 5.53             |
| H19C | 0.4975   | -1.0010  | 0.9894   | 5.53             |
| H6   | 0.057(8) | -1.09(1) | 0.521(8) | 9(2)             |

Table 3. Anisotropic displacement parameters

| atom | U <sub>11</sub> | U <sub>22</sub> | U <sub>33</sub> | U <sub>12</sub> | U <sub>13</sub> | U <sub>23</sub> |
|------|-----------------|-----------------|-----------------|-----------------|-----------------|-----------------|
| Br1  | 0.0950(4)       | 0.0357(3)       | 0.0848(4)       | 0.0040(3)       | 0.0262(3)       | -0.0168(3)      |
| O1   | 0.042(2)        | 0.066(3)        | 0.074(2)        | -0.007(2)       | -0.006(2)       | -0.022(2)       |
| O2   | 0.118(4)        | 0.027(2)        | 0.117(4)        | 0.003(2)        | 0.056(3)        | 0.012(2)        |
| O3   | 0.058(2)        | 0.030(2)        | 0.065(2)        | -0.001(2)       | 0.026(2)        | 0.001(2)        |
| O4   | 0.057(2)        | 0.046(2)        | 0.104(3)        | 0.015(2)        | 0.018(2)        | 0.019(2)        |
| O5   | 0.104(3)        | 0.057(3)        | 0.086(3)        | -0.011(3)       | 0.035(3)        | -0.032(3)       |
| N1   | 0.034(2)        | 0.030(2)        | 0.058(2)        | 0.003(2)        | 0.012(2)        | -0.002(2)       |
| N2   | 0.056(2)        | 0.028(2)        | 0.070(3)        | -0.001(2)       | 0.027(2)        | -0.003(2)       |
| C1   | 0.040(2)        | 0.032(2)        | 0.059(3)        | -0.006(2)       | 0.013(2)        | -0.005(2)       |
| C2   | 0.039(2)        | 0.026(2)        | 0.052(3)        | -0.001(2)       | 0.015(2)        | -0.001(2)       |
| C3   | 0.041(2)        | 0.030(2)        | 0.047(2)        | -0.002(2)       | 0.010(2)        | 0.002(2)        |
| C4   | 0.054(3)        | 0.044(3)        | 0.055(3)        | 0.002(2)        | 0.005(2)        | 0.007(2)        |
| C5   | 0.071(3)        | 0.072(4)        | 0.050(3)        | -0.009(3)       | -0.004(3)       | -0.000(3)       |
| C6   | 0.083(4)        | 0.058(3)        | 0.046(3)        | -0.012(3)       | 0.006(3)        | -0.010(2)       |
| C7   | 0.062(3)        | 0.037(3)        | 0.052(3)        | -0.003(2)       | 0.021(2)        | -0.006(2)       |
| C8   | 0.040(2)        | 0.026(2)        | 0.045(2)        | -0.005(2)       | 0.013(2)        | -0.002(2)       |
| C9   | 0.060(3)        | 0.028(2)        | 0.062(3)        | -0.003(2)       | 0.016(2)        | -0.002(2)       |
| C10  | 0.054(3)        | 0.047(3)        | 0.053(3)        | -0.005(2)       | 0.013(2)        | 0.006(2)        |
| C11  | 0.065(3)        | 0.079(5)        | 0.081(4)        | -0.020(3)       | 0.004(3)        | 0.016(4)        |
| C12  | 0.077(4)        | 0.134(7)        | 0.059(3)        | 0.003(5)        | -0.003(3)       | 0.004(4)        |
| C13  | 0.090(4)        | 0.063(4)        | 0.082(4)        | 0.009(4)        | 0.043(3)        | -0.000(3)       |
| C14  | 0.042(2)        | 0.030(2)        | 0.050(2)        | 0.002(2)        | 0.016(2)        | -0.001(2)       |
| C15  | 0.042(2)        | 0.043(3)        | 0.057(3)        | 0.005(2)        | 0.012(2)        | -0.002(2)       |
| C16  | 0.044(2)        | 0.048(3)        | 0.073(3)        | -0.001(2)       | 0.006(2)        | 0.005(3)        |
| C17  | 0.052(3)        | 0.050(4)        | 0.057(3)        | -0.002(2)       | 0.015(2)        | -0.014(2)       |
| C18  | 0.089(4)        | 0.088(5)        | 0.054(3)        | 0.006(4)        | -0.006(3)       | -0.008(3)       |
| C19  | 0.048(3)        | 0.044(3)        | 0.084(4)        | 0.010(2)        | 0.005(2)        | 0.002(3)        |

The general temperature factor expression:  $\exp(-2\pi^2(a^2U_{11}h^2 + b^2U_{22}k^2 + c^2U_{33}l^2 + 2a*b*U_{12}hk + 2a*c*U_{13}hl + 2b*c*U_{23}kl))$

Table 4. Bond lengths (Å)

| atom | atom | distance | atom | atom | distance |
|------|------|----------|------|------|----------|
| Br1  | C7   | 1.895(5) | O1   | C1   | 1.208(5) |
| O2   | C9   | 1.205(6) | O3   | C9   | 1.341(6) |
| O3   | C10  | 1.481(6) | O4   | C15  | 1.209(6) |
| O5   | C17  | 1.195(7) | N1   | C1   | 1.365(6) |
| N1   | C8   | 1.404(5) | N1   | C19  | 1.459(6) |
| N2   | C2   | 1.446(6) | N2   | C9   | 1.344(7) |
| C1   | C2   | 1.541(6) | C2   | C3   | 1.501(6) |
| C2   | C14  | 1.568(6) | C3   | C4   | 1.365(6) |
| C3   | C8   | 1.389(6) | C4   | C5   | 1.380(7) |
| C5   | C6   | 1.380(9) | C6   | C7   | 1.381(7) |
| C7   | C8   | 1.393(6) | C10  | C11  | 1.489(8) |
| C10  | C12  | 1.515(8) | C10  | C13  | 1.512(8) |
| C14  | C15  | 1.519(6) | C14  | C17  | 1.544(6) |
| C15  | C16  | 1.491(7) | C17  | C18  | 1.501(8) |



Table 5. Bond lengths involving hydrogens (Å)

| atom | atom | distance | atom | atom | distance |
|------|------|----------|------|------|----------|
| N2   | H2   | 0.860    | C4   | H4   | 0.930    |
| C5   | H5A  | 0.930    | C6   | H6   | 1.07(10) |
| C11  | H11A | 0.960    | C11  | H11B | 0.960    |
| C11  | H11C | 0.960    | C12  | H12A | 0.960    |
| C12  | H12B | 0.960    | C12  | H12C | 0.960    |
| C13  | H13A | 0.960    | C13  | H13B | 0.960    |
| C13  | H13C | 0.960    | C14  | H14  | 0.980    |
| C16  | H16A | 0.960    | C16  | H16B | 0.960    |
| C16  | H16C | 0.960    | C18  | H18A | 0.960    |
| C18  | H18B | 0.960    | C18  | H18C | 0.960    |
| C19  | H19A | 0.960    | C19  | H19B | 0.960    |
| C19  | H19C | 0.960    |      |      |          |

Table 6. Bond angles (°)

| atom | atom | atom | angle    | atom | atom | atom | angle    |
|------|------|------|----------|------|------|------|----------|
| C9   | O3   | C10  | 121.9(4) | C1   | N1   | C8   | 110.9(3) |
| C1   | N1   | C19  | 119.8(4) | C8   | N1   | C19  | 128.8(4) |
| C2   | N2   | C9   | 123.8(4) | O1   | C1   | N1   | 126.1(4) |
| O1   | C1   | C2   | 126.2(4) | N1   | C1   | C2   | 107.6(3) |
| N2   | C2   | C1   | 113.5(4) | N2   | C2   | C3   | 115.9(4) |
| N2   | C2   | C14  | 110.2(4) | C1   | C2   | C3   | 102.0(3) |
| C1   | C2   | C14  | 105.2(4) | C3   | C2   | C14  | 109.3(3) |
| C2   | C3   | C4   | 129.8(4) | C2   | C3   | C8   | 108.4(4) |
| C4   | C3   | C8   | 121.8(4) | C3   | C4   | C5   | 119.4(5) |
| C4   | C5   | C6   | 119.6(5) | C5   | C6   | C7   | 121.2(5) |
| Br1  | C7   | C6   | 117.5(4) | Br1  | C7   | C8   | 123.1(3) |
| C6   | C7   | C8   | 119.1(5) | N1   | C8   | C3   | 109.9(4) |
| N1   | C8   | C7   | 131.4(4) | C3   | C8   | C7   | 118.7(4) |
| O2   | C9   | O3   | 126.6(5) | O2   | C9   | N2   | 122.9(5) |
| O3   | C9   | N2   | 110.4(4) | O3   | C10  | C11  | 110.5(4) |
| O3   | C10  | C12  | 109.5(4) | O3   | C10  | C13  | 102.1(4) |
| C11  | C10  | C12  | 111.9(5) | C11  | C10  | C13  | 111.3(5) |
| C12  | C10  | C13  | 111.1(5) | C2   | C14  | C15  | 112.4(4) |
| C2   | C14  | C17  | 112.8(3) | C15  | C14  | C17  | 107.7(4) |
| O4   | C15  | C14  | 121.6(4) | O4   | C15  | C16  | 121.9(4) |
| C14  | C15  | C16  | 116.4(4) | O5   | C17  | C14  | 121.0(5) |
| O5   | C17  | C18  | 123.4(5) | C14  | C17  | C18  | 115.6(5) |

Table 7. Bond angles involving hydrogens ( $^{\circ}$ )

| atom | atom | atom | angle  | atom | atom | atom | angle  |
|------|------|------|--------|------|------|------|--------|
| C2   | N2   | H2   | 118.1  | C9   | N2   | H2   | 118.1  |
| C3   | C4   | H4   | 120.3  | C5   | C4   | H4   | 120.3  |
| C4   | C5   | H5A  | 120.2  | C6   | C5   | H5A  | 120.2  |
| C5   | C6   | H6   | 129(5) | C7   | C6   | H6   | 109(5) |
| C10  | C11  | H11A | 109.5  | C10  | C11  | H11B | 109.5  |
| C10  | C11  | H11C | 109.5  | H11A | C11  | H11B | 109.5  |
| H11A | C11  | H11C | 109.5  | H11B | C11  | H11C | 109.5  |
| C10  | C12  | H12A | 109.5  | C10  | C12  | H12B | 109.5  |
| C10  | C12  | H12C | 109.5  | H12A | C12  | H12B | 109.5  |
| H12A | C12  | H12C | 109.5  | H12B | C12  | H12C | 109.5  |
| C10  | C13  | H13A | 109.5  | C10  | C13  | H13B | 109.5  |
| C10  | C13  | H13C | 109.5  | H13A | C13  | H13B | 109.5  |
| H13A | C13  | H13C | 109.5  | H13B | C13  | H13C | 109.5  |
| C2   | C14  | H14  | 107.9  | C15  | C14  | H14  | 107.9  |
| C17  | C14  | H14  | 107.9  | C15  | C16  | H16A | 109.5  |
| C15  | C16  | H16B | 109.5  | C15  | C16  | H16C | 109.5  |
| H16A | C16  | H16B | 109.5  | H16A | C16  | H16C | 109.5  |
| H16B | C16  | H16C | 109.5  | C17  | C18  | H18A | 109.5  |
| C17  | C18  | H18B | 109.5  | C17  | C18  | H18C | 109.5  |
| H18A | C18  | H18B | 109.5  | H18A | C18  | H18C | 109.5  |
| H18B | C18  | H18C | 109.5  | N1   | C19  | H19A | 109.5  |
| N1   | C19  | H19B | 109.5  | N1   | C19  | H19C | 109.5  |
| H19A | C19  | H19B | 109.5  | H19A | C19  | H19C | 109.5  |
| H19B | C19  | H19C | 109.5  |      |      |      |        |

Table 8. Torsion Angles(°)

(Those having bond angles &gt; 160 or &lt; 20 degrees are excluded.)

| atom1 | atom2 | atom3 | atom4 | angle     | atom1 | atom2 | atom3 | atom4 | angle     |
|-------|-------|-------|-------|-----------|-------|-------|-------|-------|-----------|
| C9    | O3    | C10   | C11   | 66.8(5)   | C9    | O3    | C10   | C12   | -56.9(5)  |
| C9    | O3    | C10   | C13   | -174.8(3) | C10   | O3    | C9    | O2    | -9.2(7)   |
| C10   | O3    | C9    | N2    | 169.9(3)  | C1    | N1    | C8    | C3    | -1.2(5)   |
| C1    | N1    | C8    | C7    | 176.3(4)  | C8    | N1    | C1    | O1    | -175.7(4) |
| C8    | N1    | C1    | C2    | 7.9(4)    | C19   | N1    | C1    | O1    | -2.7(7)   |
| C19   | N1    | C1    | C2    | -179.1(4) | C19   | N1    | C8    | C3    | -173.4(4) |
| C19   | N1    | C8    | C7    | 4.1(7)    | C2    | N2    | C9    | O2    | 166.9(4)  |
| C2    | N2    | C9    | O3    | -12.2(6)  | C9    | N2    | C2    | C1    | 63.8(6)   |
| C9    | N2    | C2    | C3    | -53.8(6)  | C9    | N2    | C2    | C14   | -178.5(4) |
| O1    | C1    | C2    | N2    | 47.3(6)   | O1    | C1    | C2    | C3    | 172.6(4)  |
| O1    | C1    | C2    | C14   | -73.3(5)  | N1    | C1    | C2    | N2    | -136.3(4) |
| N1    | C1    | C2    | C3    | -10.9(4)  | N1    | C1    | C2    | C14   | 103.1(4)  |
| N2    | C2    | C3    | C4    | -47.5(6)  | N2    | C2    | C3    | C8    | 134.1(4)  |
| N2    | C2    | C14   | C15   | 61.7(4)   | N2    | C2    | C14   | C17   | -60.3(4)  |
| C1    | C2    | C3    | C4    | -171.3(4) | C1    | C2    | C3    | C8    | 10.2(4)   |
| C1    | C2    | C14   | C15   | -175.5(3) | C1    | C2    | C14   | C17   | 62.5(4)   |
| C3    | C2    | C14   | C15   | -66.7(4)  | C3    | C2    | C14   | C17   | 171.3(3)  |
| C14   | C2    | C3    | C4    | 77.7(5)   | C14   | C2    | C3    | C8    | -100.8(4) |
| C2    | C3    | C4    | C5    | -178.7(4) | C2    | C3    | C8    | N1    | -6.3(5)   |
| C2    | C3    | C8    | C7    | 175.9(3)  | C4    | C3    | C8    | N1    | 175.1(4)  |
| C4    | C3    | C8    | C7    | -2.7(6)   | C8    | C3    | C4    | C5    | -0.5(6)   |
| C3    | C4    | C5    | C6    | 2.9(7)    | C4    | C5    | C6    | C7    | -2.2(8)   |
| C5    | C6    | C7    | Br1   | 173.7(5)  | C5    | C6    | C7    | C8    | -1.0(8)   |
| Br1   | C7    | C8    | N1    | 11.7(7)   | Br1   | C7    | C8    | C3    | -171.0(3) |
| C6    | C7    | C8    | N1    | -173.9(4) | C6    | C7    | C8    | C3    | 3.4(6)    |
| C2    | C14   | C15   | O4    | -56.7(5)  | C2    | C14   | C15   | C16   | 124.4(4)  |
| C2    | C14   | C17   | O5    | 65.6(5)   | C2    | C14   | C17   | C18   | -116.5(4) |
| C15   | C14   | C17   | O5    | -59.1(5)  | C15   | C14   | C17   | C18   | 118.8(4)  |
| C17   | C14   | C15   | O4    | 68.2(5)   | C17   | C14   | C15   | C16   | -110.7(4) |

Table 9. Possible hydrogen bonds

| Donor | H  | Acceptor | D...A    | D-H  | H...A | D-H...A |           |
|-------|----|----------|----------|------|-------|---------|-----------|
| N2    | H2 | O4       | 2.856(6) | 0.86 | 2.38  | 115.09  | intramol. |
| N2    | H2 | O5       | 2.928(7) | 0.86 | 2.39  | 121.08  | intramol. |

Table 10. Intramolecular contacts less than 3.60 Å

| atom | atom | distance | atom | atom | distance |
|------|------|----------|------|------|----------|
| Br1  | N1   | 3.410(4) | Br1  | C19  | 3.275(6) |
| O1   | O3   | 3.290(5) | O1   | O5   | 3.430(6) |
| O1   | N2   | 2.996(6) | O1   | C3   | 3.540(5) |
| O1   | C8   | 3.446(5) | O1   | C9   | 3.538(6) |
| O1   | C14  | 3.082(5) | O1   | C17  | 2.971(6) |
| O1   | C18  | 3.316(7) | O1   | C19  | 2.818(7) |
| O2   | C2   | 3.563(6) | O2   | C10  | 2.862(7) |
| O2   | C11  | 3.062(8) | O2   | C12  | 3.022(9) |
| O3   | N1   | 3.227(5) | O3   | C1   | 2.767(6) |
| O3   | C2   | 2.630(5) | O3   | C3   | 2.852(5) |
| O3   | C4   | 3.535(6) | O3   | C8   | 3.266(5) |
| O4   | O5   | 2.949(6) | O4   | N2   | 2.856(6) |
| O4   | C2   | 3.015(6) | O4   | C3   | 3.599(6) |
| O4   | C4   | 3.567(7) | O4   | C17  | 2.996(6) |
| O5   | N2   | 2.928(7) | O5   | C2   | 3.094(7) |
| O5   | C15  | 2.913(6) | N1   | N2   | 3.514(5) |
| N1   | C4   | 3.582(6) | N1   | C14  | 3.236(5) |
| N2   | C4   | 3.159(6) | N2   | C8   | 3.524(6) |
| N2   | C15  | 3.003(6) | N2   | C17  | 3.010(7) |
| C1   | C9   | 3.122(6) | C1   | C17  | 2.981(6) |
| C1   | C18  | 3.555(8) | C3   | C6   | 2.733(7) |
| C3   | C9   | 3.067(6) | C3   | C15  | 3.064(6) |
| C4   | C7   | 2.778(7) | C4   | C9   | 3.566(7) |
| C4   | C14  | 3.315(6) | C4   | C15  | 3.250(7) |
| C5   | C8   | 2.775(6) | C7   | C19  | 3.242(7) |
| C8   | C14  | 3.270(6) | C9   | C11  | 3.056(8) |
| C9   | C12  | 2.971(8) | C15  | C18  | 3.586(7) |
| C16  | C17  | 3.516(6) |      |      |          |

Table 11. Intramolecular contacts less than 3.60 Å involving hydrogens

| atom | atom | distance | atom | atom | distance |
|------|------|----------|------|------|----------|
| Br1  | H19A | 3.155    | Br1  | H19B | 2.845    |
| Br1  | H6   | 2.70(8)  | O1   | H2   | 3.422    |
| O1   | H14  | 3.278    | O1   | H18B | 3.013    |
| O1   | H18C | 3.382    | O1   | H19A | 3.381    |
| O1   | H19B | 3.535    | O1   | H19C | 2.413    |
| O2   | H2   | 2.425    | O2   | H11A | 2.467    |
| O2   | H11C | 3.500    | O2   | H12B | 2.427    |
| O2   | H12C | 3.424    | O3   | H2   | 2.988    |
| O3   | H11A | 2.637    | O3   | H11B | 3.266    |
| O3   | H11C | 2.618    | O3   | H12A | 3.274    |
| O3   | H12B | 2.655    | O3   | H12C | 2.611    |
| O3   | H13A | 3.181    | O3   | H13B | 2.463    |
| O3   | H13C | 2.514    | O4   | H2   | 2.383    |
| O4   | H4   | 2.985    | O4   | H14  | 3.140    |
| O4   | H16A | 2.616    | O4   | H16B | 2.655    |
| O4   | H16C | 3.119    | O5   | H2   | 2.390    |
| O5   | H14  | 3.143    | O5   | H18A | 2.661    |
| O5   | H18B | 2.652    | O5   | H18C | 3.125    |
| N1   | H13B | 3.360    | N1   | H13C | 3.520    |
| N1   | H14  | 3.005    | N2   | H4   | 3.034    |
| N2   | H14  | 3.295    | C1   | H2   | 3.098    |
| C1   | H14  | 2.593    | C1   | H18B | 3.566    |
| C1   | H18C | 3.417    | C1   | H19A | 3.001    |
| C1   | H19B | 3.103    | C1   | H19C | 2.480    |
| C2   | H4   | 2.816    | C3   | H2   | 3.144    |
| C3   | H5A  | 3.211    | C3   | H13B | 3.522    |
| C3   | H14  | 2.618    | C4   | H12C | 3.523    |
| C4   | H14  | 3.480    | C4   | H16A | 3.430    |
| C4   | H6   | 3.41(10) | C6   | H4   | 3.227    |
| C7   | H5A  | 3.242    | C7   | H13B | 3.297    |
| C7   | H19A | 3.279    | C7   | H19B | 3.217    |
| C8   | H4   | 3.244    | C8   | H13B | 3.102    |
| C8   | H14  | 3.036    | C8   | H19A | 2.852    |
| C8   | H19B | 2.839    | C8   | H19C | 3.326    |
| C8   | H6   | 3.28(9)  | C9   | H4   | 3.477    |
| C9   | H11A | 2.802    | C9   | H11C | 3.313    |
| C9   | H12B | 2.723    | C9   | H12C | 3.165    |

Table 11. Intramolecular contacts less than 3.60 Å involving hydrogens (continued)

| atom | atom | distance | atom | atom | distance |
|------|------|----------|------|------|----------|
| C11  | H12A | 2.682    | C11  | H12B | 2.679    |
| C11  | H12C | 3.307    | C11  | H13A | 2.705    |
| C11  | H13B | 3.297    | C11  | H13C | 2.630    |
| C12  | H11A | 2.683    | C12  | H11B | 2.667    |
| C12  | H11C | 3.312    | C12  | H13A | 2.682    |
| C12  | H13B | 2.681    | C12  | H13C | 3.321    |
| C13  | H11A | 3.301    | C13  | H11B | 2.706    |
| C13  | H11C | 2.619    | C13  | H12A | 2.718    |
| C13  | H12B | 3.318    | C13  | H12C | 2.648    |
| C13  | H19A | 3.535    | C14  | H2   | 2.497    |
| C14  | H4   | 3.370    | C14  | H16A | 3.202    |
| C14  | H16B | 3.146    | C14  | H16C | 2.529    |
| C14  | H18A | 3.176    | C14  | H18B | 3.213    |
| C14  | H18C | 2.536    | C15  | H2   | 2.768    |
| C15  | H4   | 2.946    | C16  | H4   | 3.504    |
| C16  | H14  | 2.518    | C17  | H2   | 2.745    |
| C17  | H16C | 3.538    | C18  | H14  | 2.529    |
| C19  | H13C | 3.593    | H2   | H4   | 3.366    |
| H2   | H14  | 3.438    | H4   | H5A  | 2.317    |
| H4   | H16A | 3.127    | H5A  | H6   | 2.527    |
| H11A | H12A | 2.974    | H11A | H12B | 2.519    |
| H11A | H12C | 3.548    | H11A | H13A | 3.588    |
| H11A | H13C | 3.490    | H11B | H12A | 2.505    |
| H11B | H12B | 2.947    | H11B | H12C | 3.538    |
| H11B | H13A | 2.584    | H11B | H13B | 3.582    |
| H11B | H13C | 2.955    | H11C | H12A | 3.549    |
| H11C | H12B | 3.555    | H11C | H13A | 2.938    |
| H11C | H13B | 3.480    | H11C | H13C | 2.409    |
| H12A | H13A | 2.552    | H12A | H13B | 3.012    |
| H12A | H13C | 3.580    | H12B | H13A | 3.568    |
| H12B | H13B | 3.533    | H12C | H13A | 2.910    |
| H12C | H13B | 2.476    | H12C | H13C | 3.528    |
| H13B | H19A | 3.215    | H13C | H19A | 2.957    |
| H14  | H16A | 3.190    | H14  | H16B | 3.150    |
| H14  | H16C | 2.122    | H14  | H18A | 3.143    |
| H14  | H18B | 3.219    | H14  | H18C | 2.126    |
| H16C | H18C | 3.522    |      |      |          |



Table 12. Intermolecular contacts less than 3.60 Å

| atom | atom             | distance | atom | atom             | distance |
|------|------------------|----------|------|------------------|----------|
| Br1  | O2 <sup>1</sup>  | 3.071(4) | O1   | C16 <sup>2</sup> | 3.496(5) |
| O1   | C19 <sup>3</sup> | 3.258(7) | O2   | Br1 <sup>4</sup> | 3.071(4) |
| O2   | C16 <sup>5</sup> | 3.585(8) | O4   | N1 <sup>5</sup>  | 3.397(6) |
| O5   | C6 <sup>5</sup>  | 3.569(7) | O5   | C7 <sup>5</sup>  | 3.410(7) |
| O5   | C8 <sup>5</sup>  | 3.540(6) | O5   | C16 <sup>5</sup> | 3.482(7) |
| N1   | O4 <sup>6</sup>  | 3.397(6) | C6   | O5 <sup>6</sup>  | 3.569(7) |
| C7   | O5 <sup>6</sup>  | 3.410(7) | C8   | O5 <sup>6</sup>  | 3.540(6) |
| C16  | O1 <sup>7</sup>  | 3.496(5) | C16  | O2 <sup>6</sup>  | 3.585(8) |
| C16  | O5 <sup>6</sup>  | 3.482(7) | C19  | O1 <sup>8</sup>  | 3.258(7) |

Symmetry Operators:

- |                     |                       |
|---------------------|-----------------------|
| (1) X,Y-1,Z         | (2) X+1,Y,Z           |
| (3) -X+1,Y+1/2,-Z+2 | (4) X,Y+1,Z           |
| (5) -X,Y+1/2,-Z+2   | (6) -X,Y+1/2-1,-Z+2   |
| (7) X-1,Y,Z         | (8) -X+1,Y+1/2-1,-Z+2 |

Table 13. Intermolecular contacts less than 3.60 Å involving hydrogens

| atom | atom               | distance | atom | atom               | distance |
|------|--------------------|----------|------|--------------------|----------|
| Br1  | H5A <sup>1</sup>   | 3.265    | Br1  | H11B <sup>2</sup>  | 3.482    |
| Br1  | H12A <sup>2</sup>  | 3.413    | Br1  | H13A <sup>2</sup>  | 3.049    |
| Br1  | H16B <sup>3</sup>  | 3.201    | Br1  | H18A <sup>3</sup>  | 3.098    |
| O1   | H16A <sup>4</sup>  | 3.430    | O1   | H16B <sup>4</sup>  | 2.756    |
| O1   | H19A <sup>5</sup>  | 3.230    | O1   | H19B <sup>5</sup>  | 2.705    |
| O1   | H19C <sup>5</sup>  | 3.336    | O2   | H5A <sup>6</sup>   | 3.263    |
| O2   | H16B <sup>7</sup>  | 3.152    | O2   | H16C <sup>7</sup>  | 3.123    |
| O2   | H19C <sup>5</sup>  | 3.271    | O3   | H19C <sup>5</sup>  | 3.540    |
| O4   | H11C <sup>8</sup>  | 2.802    | O4   | H14 <sup>7</sup>   | 2.833    |
| O4   | H18C <sup>7</sup>  | 2.771    | O4   | H19B <sup>7</sup>  | 3.079    |
| O5   | H14 <sup>7</sup>   | 3.252    | O5   | H16A <sup>7</sup>  | 3.490    |
| O5   | H16C <sup>7</sup>  | 2.688    | O5   | H19A <sup>5</sup>  | 3.486    |
| N2   | H16C <sup>7</sup>  | 2.958    | N2   | H19C <sup>5</sup>  | 3.381    |
| C1   | H16B <sup>4</sup>  | 3.559    | C4   | H6 <sup>6</sup>    | 3.24(10) |
| C5   | H12B <sup>1</sup>  | 3.151    | C5   | H18A <sup>9</sup>  | 3.310    |
| C5   | H6 <sup>6</sup>    | 3.54(11) | C6   | H11B <sup>2</sup>  | 3.411    |
| C6   | H12B <sup>1</sup>  | 3.483    | C6   | H12C <sup>1</sup>  | 3.598    |
| C6   | H18A <sup>3</sup>  | 3.443    | C7   | H11B <sup>2</sup>  | 3.462    |
| C7   | H18A <sup>3</sup>  | 3.476    | C9   | H16C <sup>7</sup>  | 3.338    |
| C9   | H19C <sup>5</sup>  | 3.128    | C11  | H18B <sup>5</sup>  | 3.340    |
| C11  | H18C <sup>5</sup>  | 3.484    | C12  | H5A <sup>6</sup>   | 3.439    |
| C12  | H18B <sup>9</sup>  | 3.307    | C13  | H12A <sup>2</sup>  | 3.578    |
| C13  | H12B <sup>2</sup>  | 3.503    | C13  | H16A <sup>4</sup>  | 3.110    |
| C15  | H11C <sup>8</sup>  | 3.417    | C15  | H19B <sup>7</sup>  | 3.303    |
| C16  | H2 <sup>3</sup>    | 3.197    | C16  | H11C <sup>8</sup>  | 3.429    |
| C16  | H13C <sup>8</sup>  | 3.126    | C16  | H19A <sup>8</sup>  | 3.412    |
| C16  | H19B <sup>7</sup>  | 3.020    | C16  | H19C <sup>8</sup>  | 3.149    |
| C18  | H11A <sup>10</sup> | 3.582    | C18  | H12C <sup>11</sup> | 3.242    |
| C19  | H16A <sup>4</sup>  | 3.366    | C19  | H16B <sup>4</sup>  | 3.562    |
| C19  | H16B <sup>3</sup>  | 3.204    | C19  | H16C <sup>4</sup>  | 3.543    |
| H2   | C16 <sup>7</sup>   | 3.197    | H2   | H14 <sup>7</sup>   | 2.895    |
| H2   | H16B <sup>7</sup>  | 3.446    | H2   | H16C <sup>7</sup>  | 2.271    |
| H2   | H18C <sup>7</sup>  | 3.198    | H2   | H19C <sup>5</sup>  | 3.419    |
| H4   | H11B <sup>8</sup>  | 3.518    | H4   | H11C <sup>8</sup>  | 3.308    |
| H4   | H13A <sup>8</sup>  | 3.569    | H4   | H13C <sup>8</sup>  | 3.381    |
| H4   | H6 <sup>6</sup>    | 2.676    | H5A  | Br1 <sup>6</sup>   | 3.265    |
| H5A  | O2 <sup>1</sup>    | 3.263    | H5A  | C12 <sup>1</sup>   | 3.439    |

Table 13. Intermolecular contacts less than 3.60 Å involving hydrogens (continued)

| atom | atom               | distance | atom | atom               | distance |
|------|--------------------|----------|------|--------------------|----------|
| H5A  | H12B <sup>1</sup>  | 2.583    | H5A  | H12C <sup>1</sup>  | 3.567    |
| H5A  | H13A <sup>8</sup>  | 3.199    | H5A  | H18A <sup>9</sup>  | 2.894    |
| H5A  | H6 <sup>6</sup>    | 3.228    | H11A | C18 <sup>5</sup>   | 3.582    |
| H11A | H13A <sup>12</sup> | 3.256    | H11A | H13B <sup>12</sup> | 3.351    |
| H11A | H18B <sup>5</sup>  | 2.891    | H11A | H18C <sup>5</sup>  | 3.398    |
| H11A | H19C <sup>5</sup>  | 3.461    | H11B | Br1 <sup>12</sup>  | 3.482    |
| H11B | C6 <sup>12</sup>   | 3.411    | H11B | C7 <sup>12</sup>   | 3.462    |
| H11B | H4 <sup>4</sup>    | 3.518    | H11B | H13B <sup>12</sup> | 3.060    |
| H11B | H18B <sup>5</sup>  | 3.245    | H11B | H18C <sup>5</sup>  | 3.405    |
| H11B | H6 <sup>12</sup>   | 3.082    | H11C | O4 <sup>4</sup>    | 2.802    |
| H11C | C15 <sup>4</sup>   | 3.417    | H11C | C16 <sup>4</sup>   | 3.429    |
| H11C | H4 <sup>4</sup>    | 3.308    | H11C | H16A <sup>4</sup>  | 2.829    |
| H11C | H18B <sup>5</sup>  | 3.345    | H11C | H18C <sup>5</sup>  | 3.083    |
| H11C | H19B <sup>5</sup>  | 3.570    | H11C | H19C <sup>5</sup>  | 3.367    |
| H12A | Br1 <sup>12</sup>  | 3.413    | H12A | C13 <sup>12</sup>  | 3.578    |
| H12A | H13A <sup>12</sup> | 3.474    | H12A | H13B <sup>12</sup> | 3.177    |
| H12A | H13C <sup>12</sup> | 3.509    | H12A | H18B <sup>9</sup>  | 3.072    |
| H12A | H19A <sup>12</sup> | 3.244    | H12B | C5 <sup>6</sup>    | 3.151    |
| H12B | C6 <sup>6</sup>    | 3.483    | H12B | C13 <sup>12</sup>  | 3.503    |
| H12B | H5A <sup>6</sup>   | 2.583    | H12B | H13A <sup>12</sup> | 2.993    |
| H12B | H13B <sup>12</sup> | 3.422    | H12B | H13C <sup>12</sup> | 3.550    |
| H12B | H6 <sup>6</sup>    | 3.333    | H12C | C6 <sup>6</sup>    | 3.598    |
| H12C | C18 <sup>9</sup>   | 3.242    | H12C | H5A <sup>6</sup>   | 3.567    |
| H12C | H18A <sup>9</sup>  | 2.962    | H12C | H18B <sup>9</sup>  | 2.671    |
| H12C | H6 <sup>6</sup>    | 3.151    | H13A | Br1 <sup>12</sup>  | 3.049    |
| H13A | H4 <sup>4</sup>    | 3.569    | H13A | H5A <sup>4</sup>   | 3.199    |
| H13A | H11A <sup>2</sup>  | 3.256    | H13A | H12A <sup>2</sup>  | 3.474    |
| H13A | H12B <sup>2</sup>  | 2.993    | H13A | H16A <sup>4</sup>  | 3.595    |
| H13B | H11A <sup>2</sup>  | 3.351    | H13B | H11B <sup>2</sup>  | 3.060    |
| H13B | H12A <sup>2</sup>  | 3.177    | H13B | H12B <sup>2</sup>  | 3.422    |
| H13C | C16 <sup>4</sup>   | 3.126    | H13C | H4 <sup>4</sup>    | 3.381    |
| H13C | H12A <sup>2</sup>  | 3.509    | H13C | H12B <sup>2</sup>  | 3.550    |
| H13C | H16A <sup>4</sup>  | 2.168    | H13C | H16B <sup>4</sup>  | 3.525    |
| H13C | H16C <sup>4</sup>  | 3.596    | H14  | O4 <sup>3</sup>    | 2.833    |
| H14  | O5 <sup>3</sup>    | 3.252    | H14  | H2 <sup>3</sup>    | 2.895    |
| H16A | O1 <sup>8</sup>    | 3.430    | H16A | O5 <sup>3</sup>    | 3.490    |
| H16A | C13 <sup>8</sup>   | 3.110    | H16A | C19 <sup>8</sup>   | 3.366    |

Table 13. Intermolecular contacts less than 3.60 Å involving hydrogens (continued)

| atom | atom               | distance | atom | atom               | distance |
|------|--------------------|----------|------|--------------------|----------|
| H16A | H11C <sup>8</sup>  | 2.829    | H16A | H13A <sup>8</sup>  | 3.595    |
| H16A | H13C <sup>8</sup>  | 2.168    | H16A | H19A <sup>8</sup>  | 2.937    |
| H16A | H19B <sup>7</sup>  | 3.302    | H16A | H19C <sup>8</sup>  | 3.065    |
| H16B | Br1 <sup>7</sup>   | 3.201    | H16B | O1 <sup>8</sup>    | 2.756    |
| H16B | O2 <sup>3</sup>    | 3.152    | H16B | C1 <sup>8</sup>    | 3.559    |
| H16B | C19 <sup>8</sup>   | 3.562    | H16B | C19 <sup>7</sup>   | 3.204    |
| H16B | H2 <sup>3</sup>    | 3.446    | H16B | H13C <sup>8</sup>  | 3.525    |
| H16B | H19A <sup>8</sup>  | 3.534    | H16B | H19B <sup>7</sup>  | 2.250    |
| H16B | H19C <sup>8</sup>  | 2.889    | H16B | H19C <sup>7</sup>  | 3.595    |
| H16C | O2 <sup>3</sup>    | 3.123    | H16C | O5 <sup>3</sup>    | 2.688    |
| H16C | N2 <sup>3</sup>    | 2.958    | H16C | C9 <sup>3</sup>    | 3.338    |
| H16C | C19 <sup>8</sup>   | 3.543    | H16C | H2 <sup>3</sup>    | 2.271    |
| H16C | H13C <sup>8</sup>  | 3.596    | H16C | H19A <sup>8</sup>  | 3.236    |
| H16C | H19C <sup>8</sup>  | 2.960    | H18A | Br1 <sup>7</sup>   | 3.098    |
| H18A | C5 <sup>11</sup>   | 3.310    | H18A | C6 <sup>7</sup>    | 3.443    |
| H18A | C7 <sup>7</sup>    | 3.476    | H18A | H5A <sup>11</sup>  | 2.894    |
| H18A | H12C <sup>11</sup> | 2.962    | H18A | H6 <sup>7</sup>    | 3.108    |
| H18B | C11 <sup>10</sup>  | 3.340    | H18B | C12 <sup>11</sup>  | 3.307    |
| H18B | H11A <sup>10</sup> | 2.891    | H18B | H11B <sup>10</sup> | 3.245    |
| H18B | H11C <sup>10</sup> | 3.345    | H18B | H12A <sup>11</sup> | 3.072    |
| H18B | H12C <sup>11</sup> | 2.671    | H18C | O4 <sup>3</sup>    | 2.771    |
| H18C | C11 <sup>10</sup>  | 3.484    | H18C | H2 <sup>3</sup>    | 3.198    |
| H18C | H11A <sup>10</sup> | 3.398    | H18C | H11B <sup>10</sup> | 3.405    |
| H18C | H11C <sup>10</sup> | 3.083    | H19A | O1 <sup>10</sup>   | 3.230    |
| H19A | O5 <sup>10</sup>   | 3.486    | H19A | C16 <sup>4</sup>   | 3.412    |
| H19A | H12A <sup>2</sup>  | 3.244    | H19A | H16A <sup>4</sup>  | 2.937    |
| H19A | H16B <sup>4</sup>  | 3.534    | H19A | H16C <sup>4</sup>  | 3.236    |
| H19B | O1 <sup>10</sup>   | 2.705    | H19B | O4 <sup>3</sup>    | 3.079    |
| H19B | C15 <sup>3</sup>   | 3.303    | H19B | C16 <sup>3</sup>   | 3.020    |
| H19B | H11C <sup>10</sup> | 3.570    | H19B | H16A <sup>3</sup>  | 3.302    |
| H19B | H16B <sup>3</sup>  | 2.250    | H19C | O1 <sup>10</sup>   | 3.336    |
| H19C | O2 <sup>10</sup>   | 3.271    | H19C | O3 <sup>10</sup>   | 3.540    |
| H19C | N2 <sup>10</sup>   | 3.381    | H19C | C9 <sup>10</sup>   | 3.128    |
| H19C | C16 <sup>4</sup>   | 3.149    | H19C | H2 <sup>10</sup>   | 3.419    |
| H19C | H11A <sup>10</sup> | 3.461    | H19C | H11C <sup>10</sup> | 3.367    |
| H19C | H16A <sup>4</sup>  | 3.065    | H19C | H16B <sup>4</sup>  | 2.889    |
| H19C | H16B <sup>3</sup>  | 3.595    | H19C | H16C <sup>4</sup>  | 2.960    |

Table 13. Intermolecular contacts less than 3.60 Å involving hydrogens (continued)

| atom | atom              | distance | atom | atom              | distance |
|------|-------------------|----------|------|-------------------|----------|
| H6   | C4 <sup>1</sup>   | 3.24(10) | H6   | C5 <sup>1</sup>   | 3.54(11) |
| H6   | H4 <sup>1</sup>   | 2.676    | H6   | H5A <sup>1</sup>  | 3.228    |
| H6   | H11B <sup>2</sup> | 3.082    | H6   | H12B <sup>1</sup> | 3.333    |
| H6   | H12C <sup>1</sup> | 3.151    | H6   | H18A <sup>3</sup> | 3.108    |

Symmetry Operators:

- |                     |                        |
|---------------------|------------------------|
| (1) -X,Y+1/2-1,-Z+1 | (2) -X+1,Y+1/2-1,-Z+1  |
| (3) -X,Y+1/2-1,-Z+2 | (4) X+1,Y,Z            |
| (5) -X+1,Y+1/2,-Z+2 | (6) -X,Y+1/2,-Z+1      |
| (7) -X,Y+1/2,-Z+2   | (8) X-1,Y,Z            |
| (9) X,Y,Z-1         | (10) -X+1,Y+1/2-1,-Z+2 |
| (11) X,Y,Z+1        | (12) -X+1,Y+1/2,-Z+1   |
